# Supplementary material for: Complete amide cis–trans switching synchronized with disulfide bond formation and cleavage in a proline-mimicking system
Source: Royal Society of Chemistry journal article supplement (doi:10.1039/d4cc01096e), 2024-01-01
Supplement: d4cc01096e1.pdf [file d4cc01096e1.pdf]

## Electronic Supplementary

### Complete Amide Cis-Trans Switching Synchronized with Disulfide Bond Formation and Cleavage in a Proline-Mimicking System

Yuhe Cheng,<sup>1</sup> Tadashi Hyodo,<sup>2</sup> Kentaro Yamaguchi,<sup>2</sup> Tomohiko Ohwada,<sup>1\*</sup> Yuko Otani<sup>1\*</sup>

<sup>1</sup> *Graduate School of Pharmaceutical Sciences, University of Tokyo, 7-3-1 Hongo,  
Bunkyo-ku, Tokyo, 113-0033, Japan*

<sup>2</sup> *Department of Pharmaceutical Sciences at Kagawa Campus, Tokushima Bunri  
University, 1314-1 Shido, Sanuki, Kagawa 769-2193, Japan.*

*E-mail: otani@mol.f.u-tokyo.ac.jp, ohwada@mol.f.u-tokyo.ac.jp*

#### Table of Contents

|                                                                                      |                  |
|--------------------------------------------------------------------------------------|------------------|
| <b>1. Supporting Graphics and Data</b> .....                                         | <b>page S2</b>   |
| <b>2. Experimental Section</b> .....                                                 | <b>page S23</b>  |
| General methods                                                                      |                  |
| X-ray Crystallographic analysis                                                      |                  |
| Synthesis                                                                            |                  |
| <b>3. <sup>1</sup>H and <sup>13</sup>C-NMR Charts of synthesized compounds</b> ..... | <b>page S50</b>  |
| <b>4. HPLC Charts</b> .....                                                          | <b>page S87</b>  |
| <b>5. Computational Study</b> .....                                                  | <b>page S93</b>  |
| <b>6. References</b> .....                                                           | <b>page S102</b> |

## 1. Supporting Graphics and Data

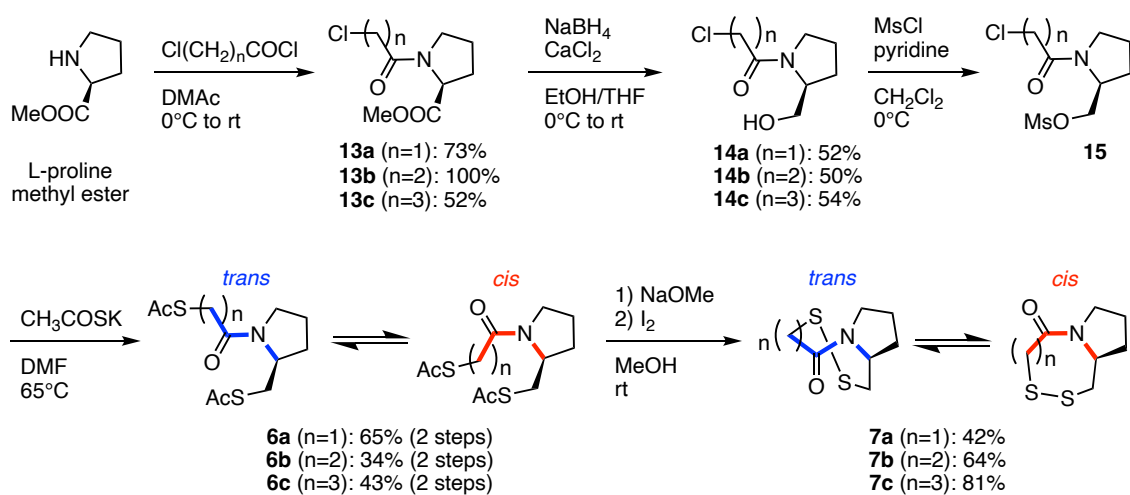

**Figure S1.** Synthesis of compounds fused with a monocyclic ring.

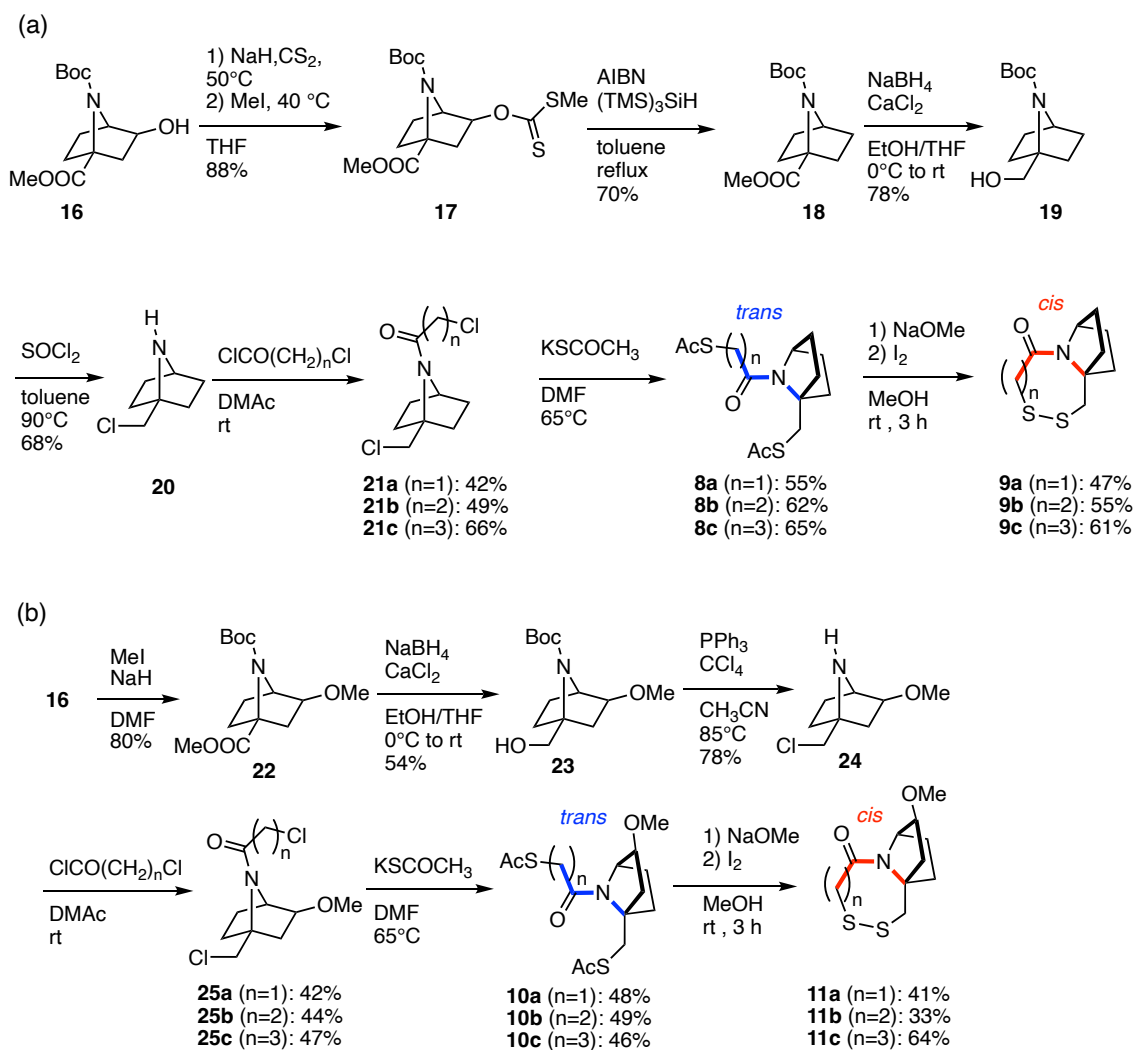

**Figure S2.** Synthesis of compounds fused with a bicyclic ring.

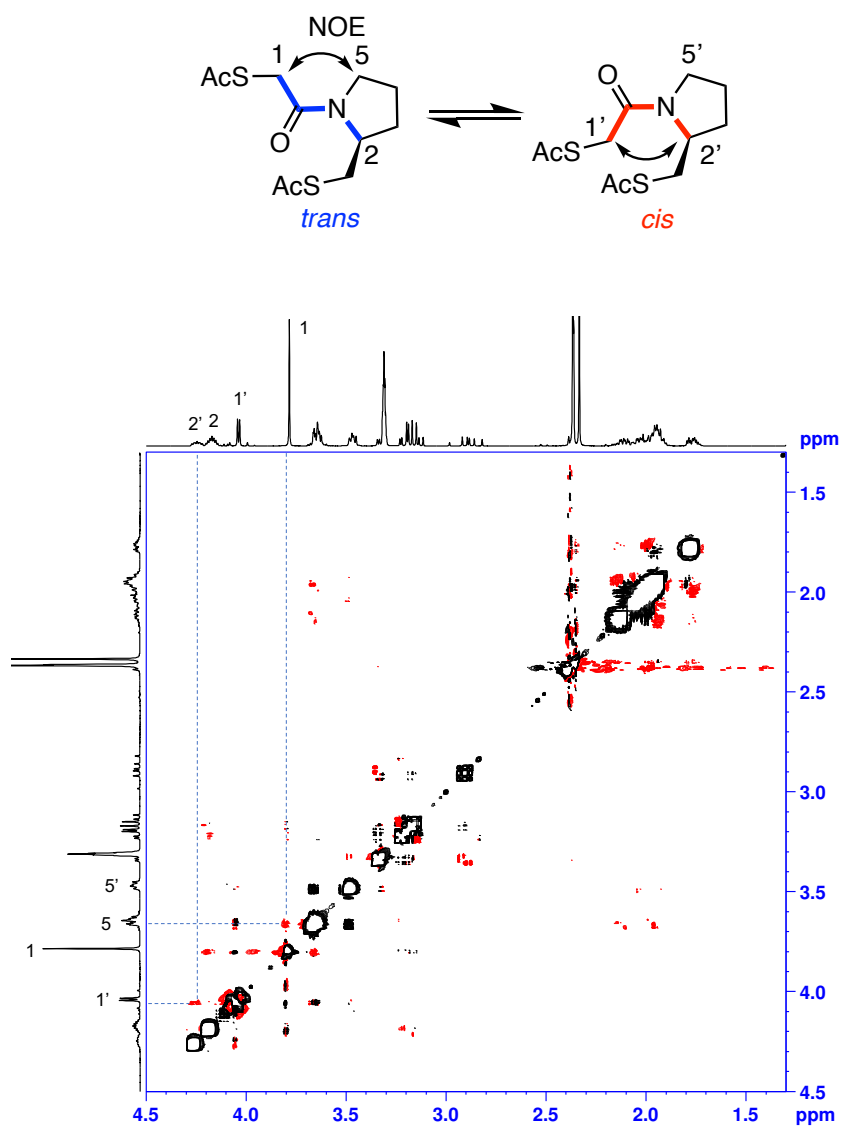

**Figure S3.** NOESY spectrum of **6a** in MeOD (mixing time = 800 msec).



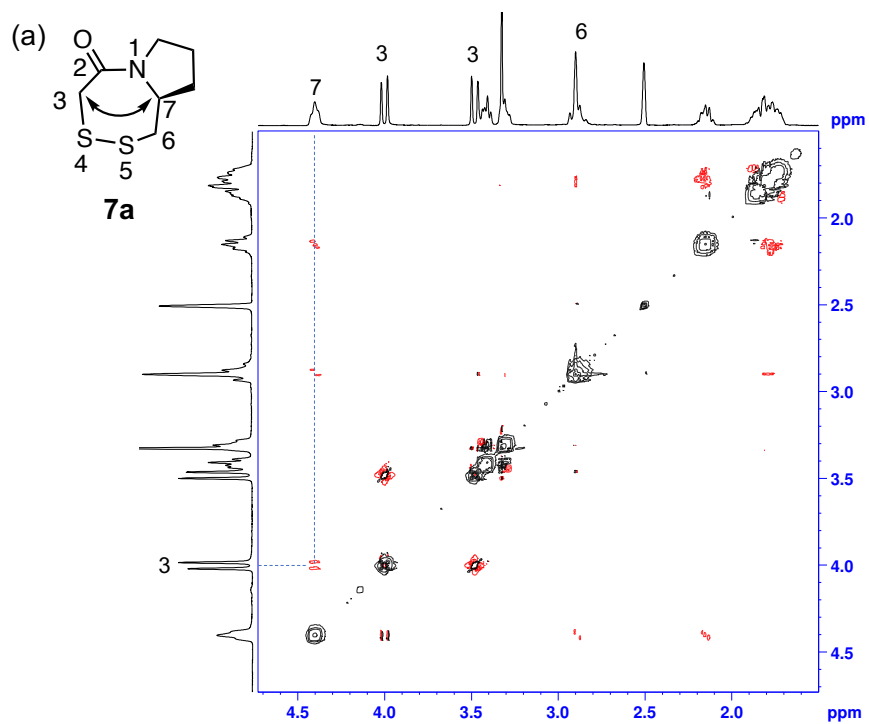

**Figure S4.** (a) NOESY spectrum of **7a** in  $\text{DMSO-}d_6$  (mixing time = 800 msec).

NOESY

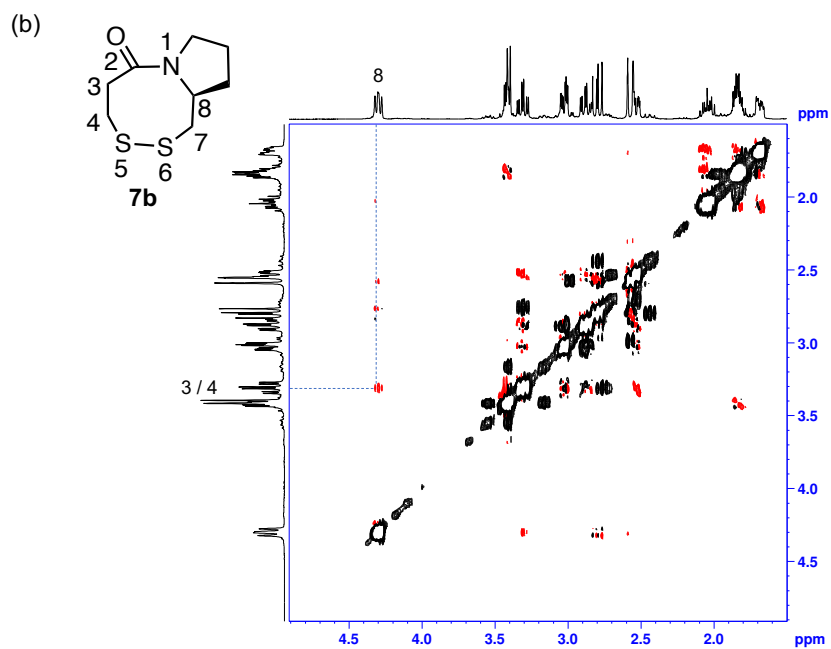

TOCSY

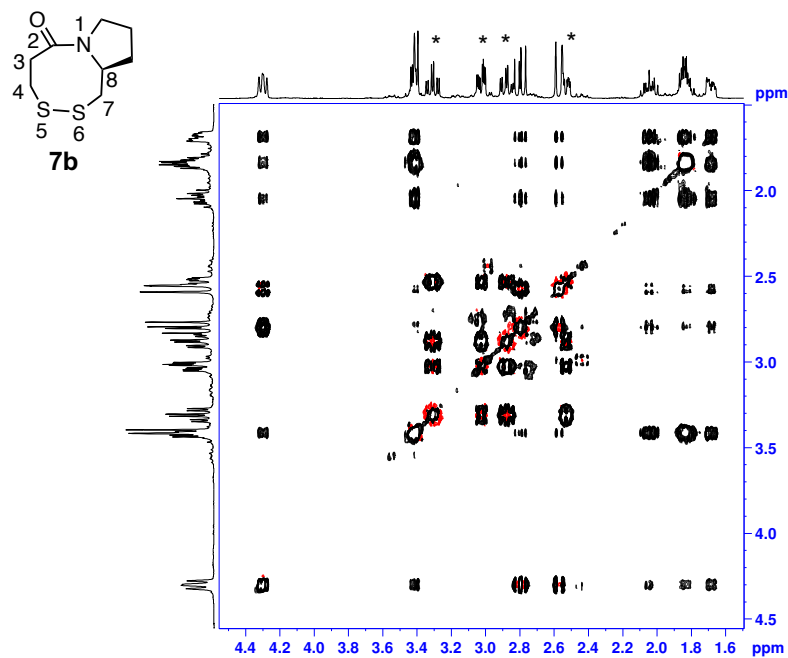

**Figure S4.** (continued) (b) NOESY (mixing time = 800 msec) and TOCSY spectra of **7b** in  $\text{CH}_2\text{Cl}_2$  at 241.6 K. Signals marked with an asterisks are assigned as either 3-H or 4-H.

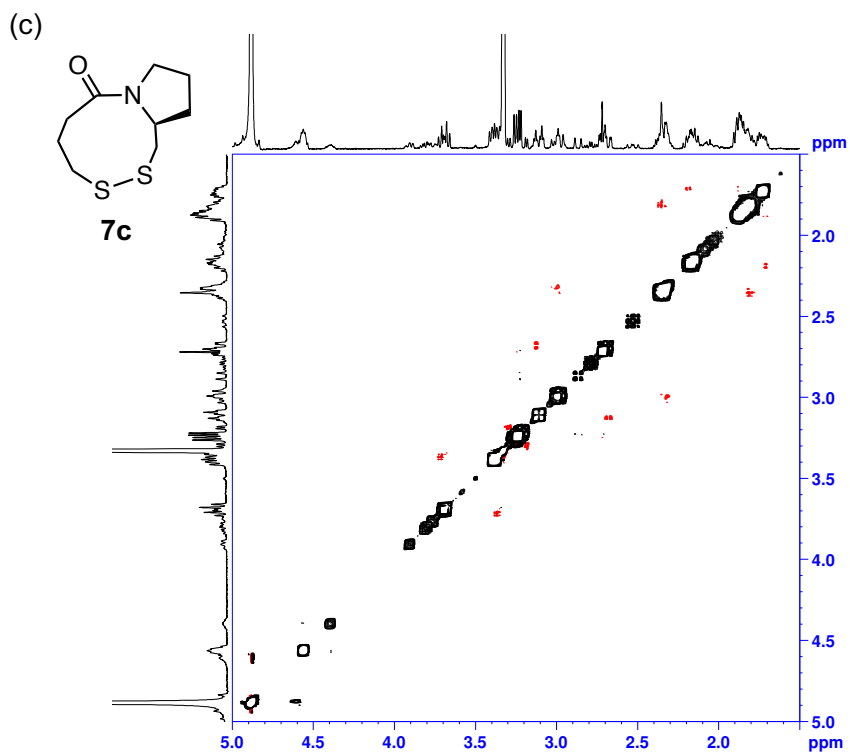

**Figure S4. (continued)** (c) NOESY spectrum of **7c** in MeOD (mixing time = 800 msec).

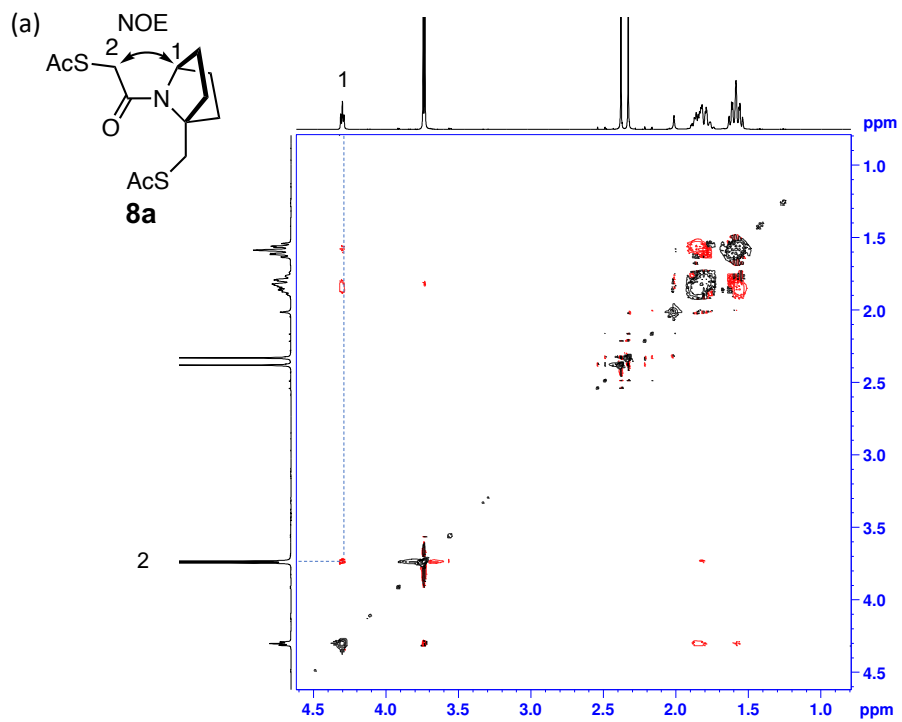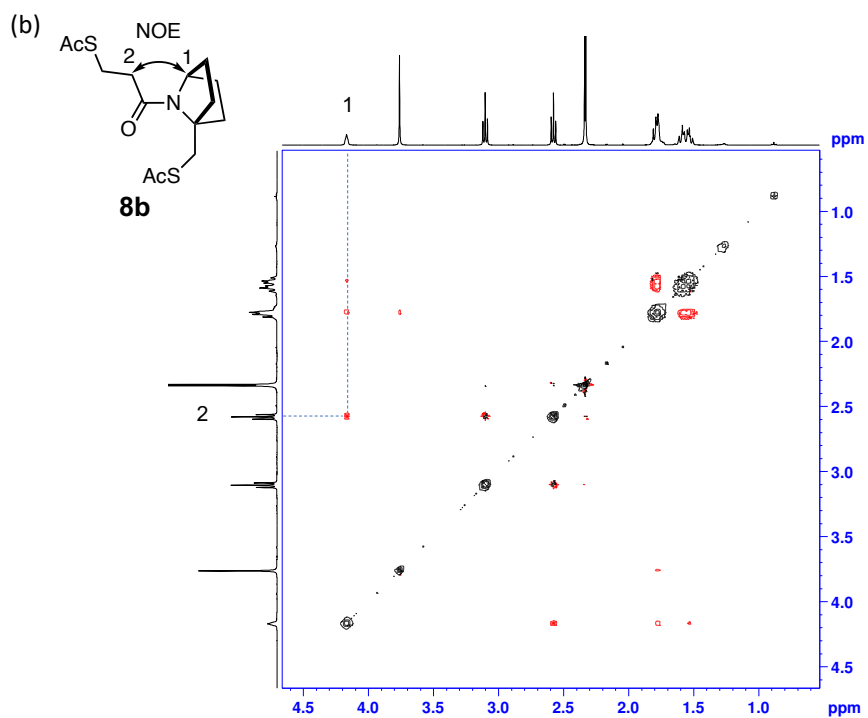

**Figure S5.** (a) NOESY spectrum of **8a** in CDCl<sub>3</sub> (mixing time = 800 msec). (b) NOESY spectrum of **8b** in CDCl<sub>3</sub> (mixing time = 800 msec).

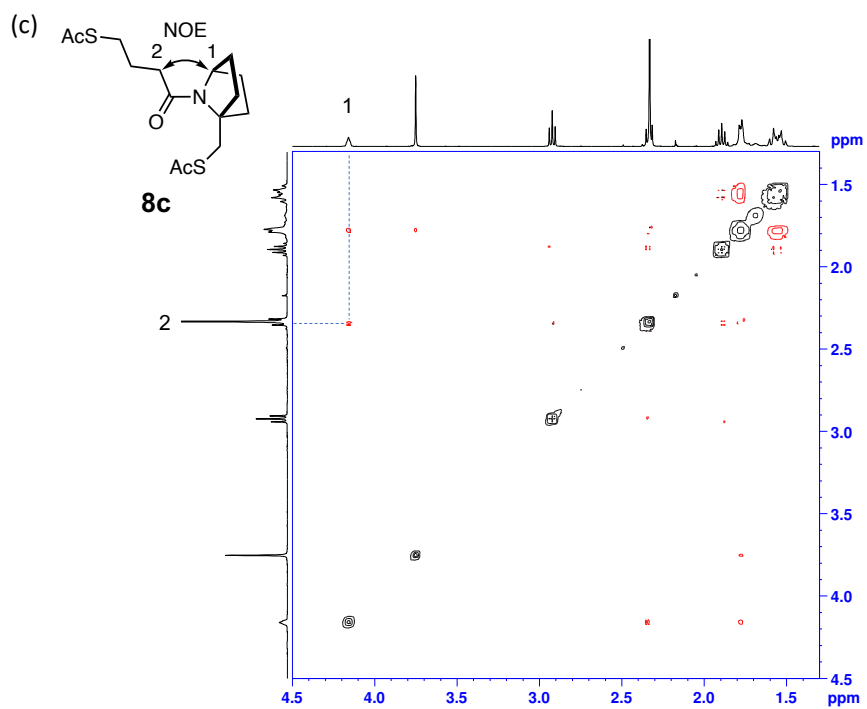

**Figure S5. (continued)** (c) NOESY spectrum of **8c** in  $\text{CDCl}_3$  (mixing time = 800 msec).

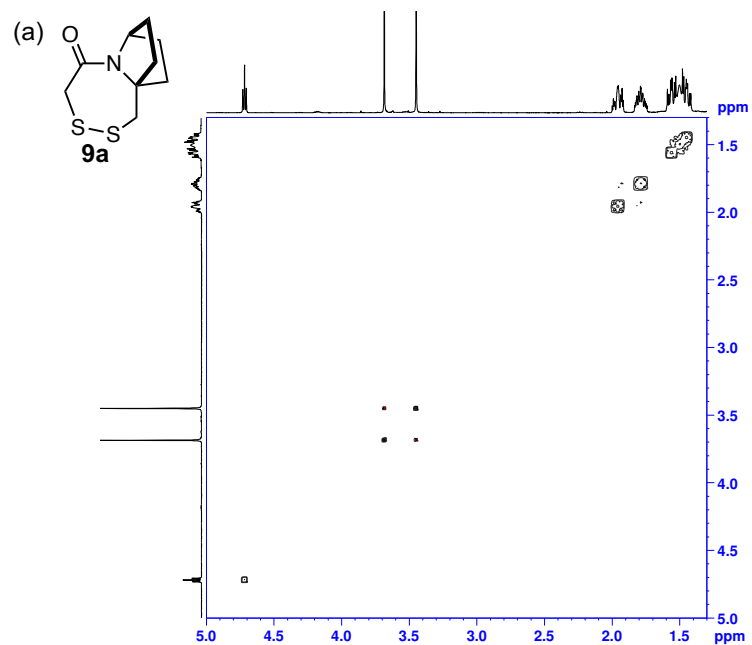

**Figure S6.** (a) NOESY spectrum of **9a** in  $\text{CD}_2\text{Cl}_2$  (mixing time = 800 msec).

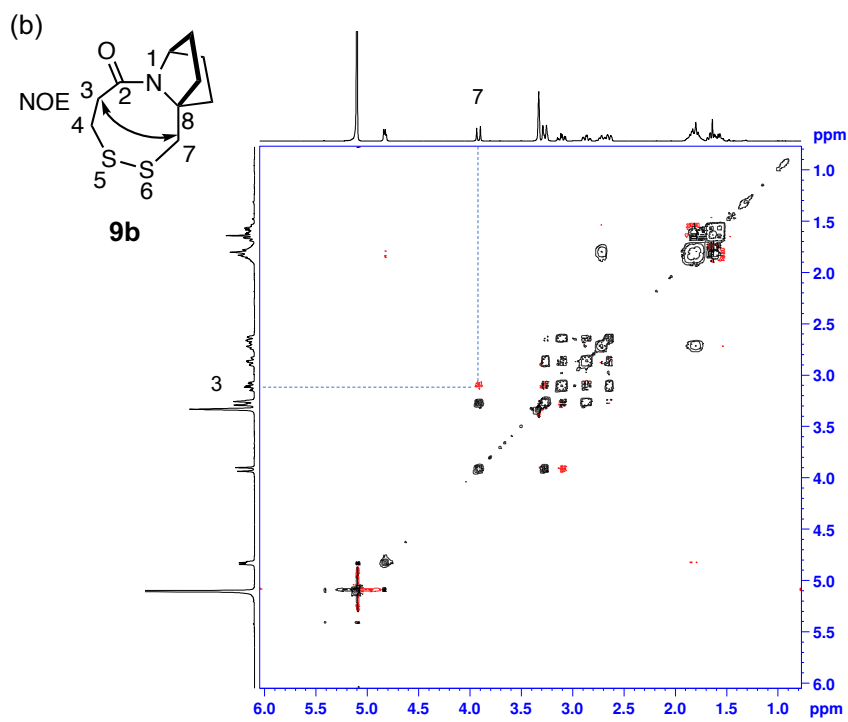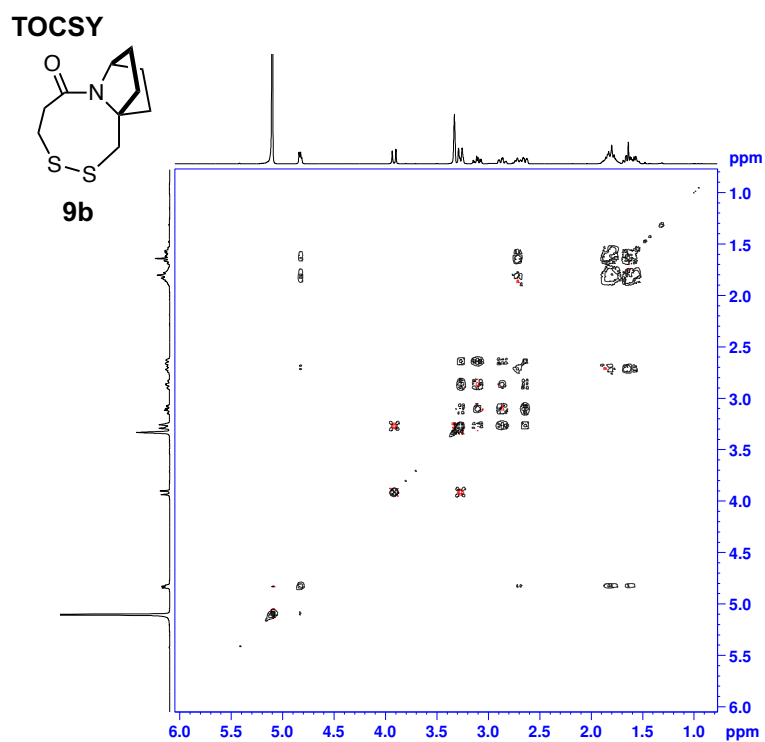

**Figure S6 (continued)** (b) NOESY (mixing time = 800 msec) and TOCSY spectra of **9b** in MeOD at 274.6 K.

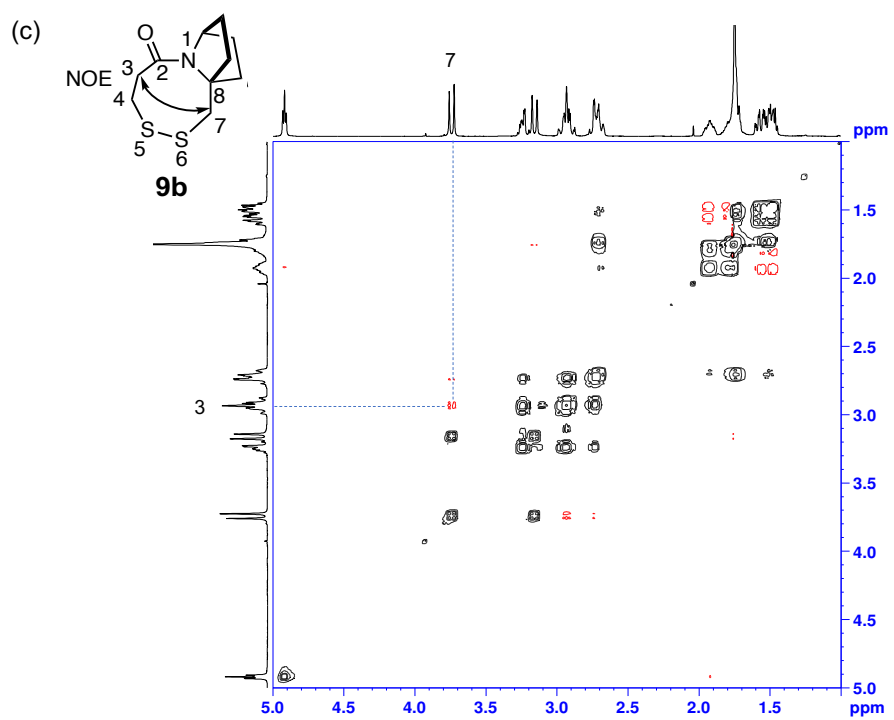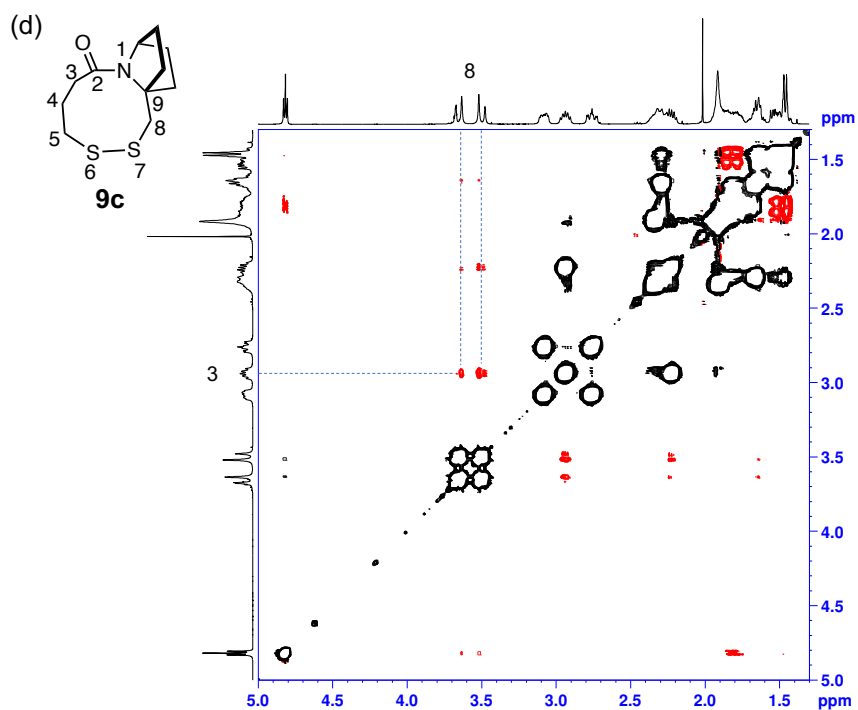

**Figure S6. (continued)** (c) NOESY spectrum of **9b** in  $\text{CDCl}_3$  at 274.6 K (mixing time = 800 msec). (d) NOESY spectrum of **9c** in  $\text{CD}_2\text{Cl}_2$  at 274.6 K (mixing time = 800 msec).

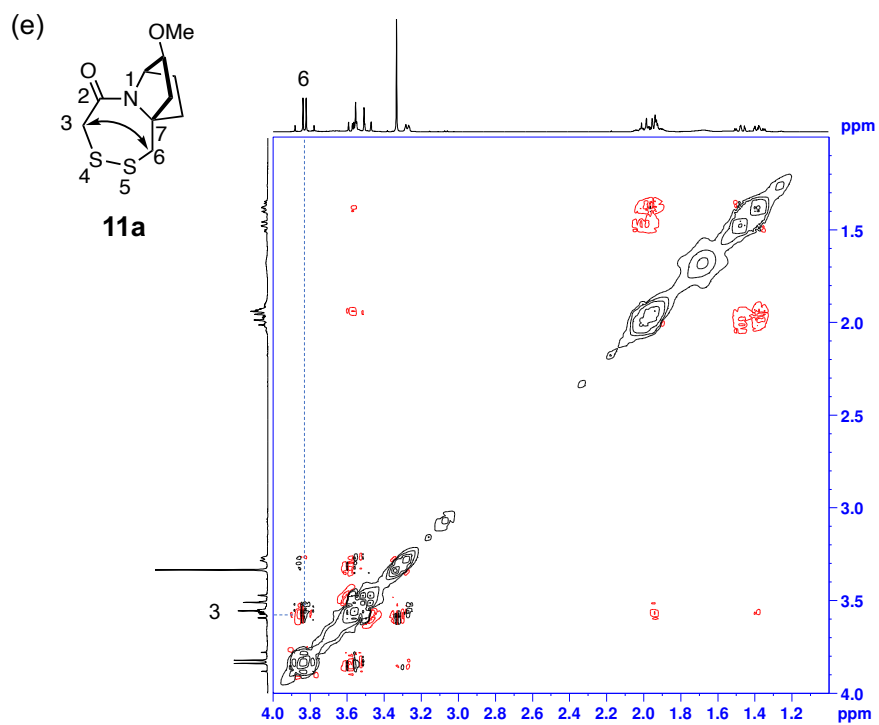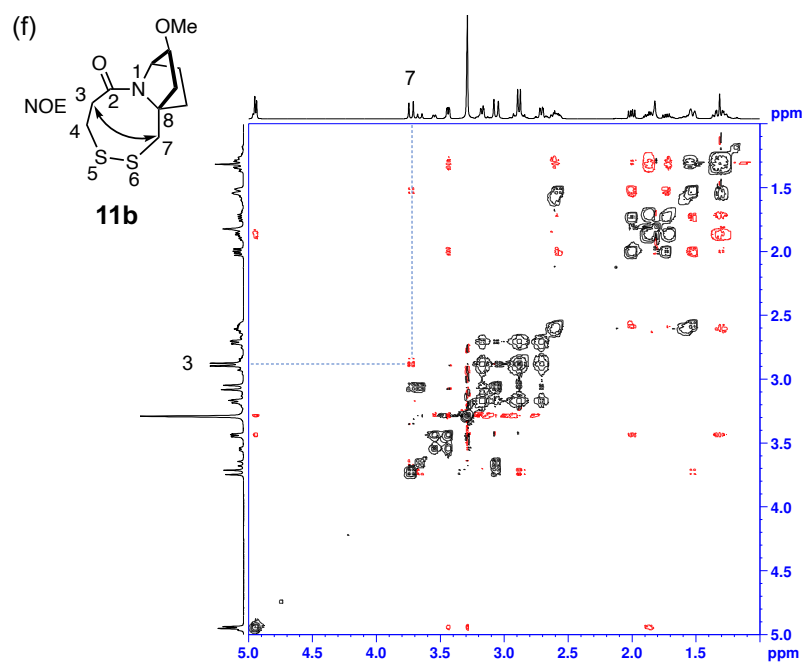

**Figure S6. (continued)** (e) NOESY spectrum of **11a** in  $\text{CDCl}_3$  (mixing time = 800 msec). (f) NOESY spectrum of **11b** in  $\text{CDCl}_3$  at 275.3 K (mixing time = 800 msec).



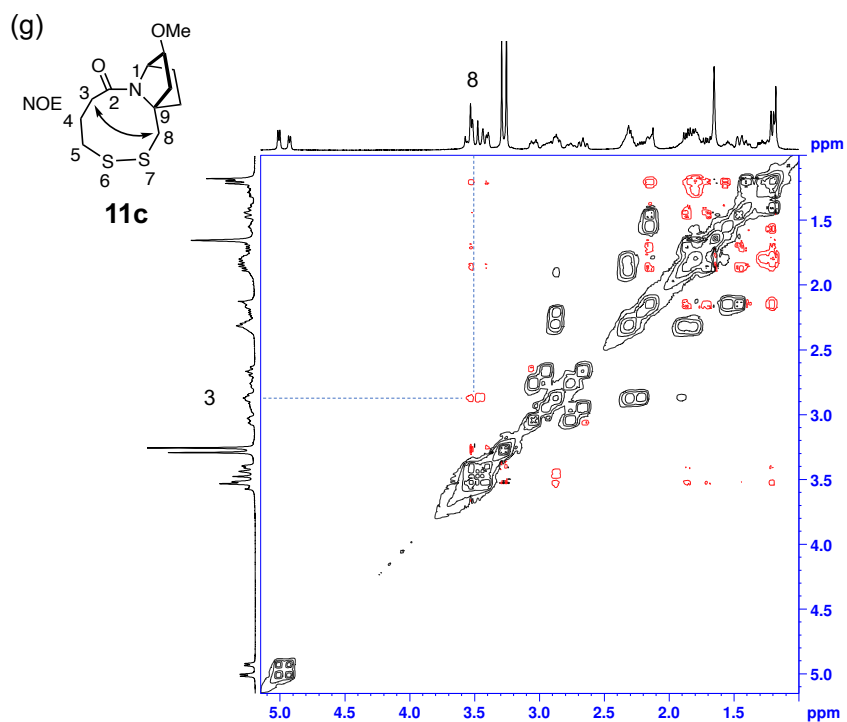

**Figure S6. (continued)** (g) NOESY spectrum of **11c** in  $\text{CDCl}_3$  at 276.5 K (mixing time = 800 msec).

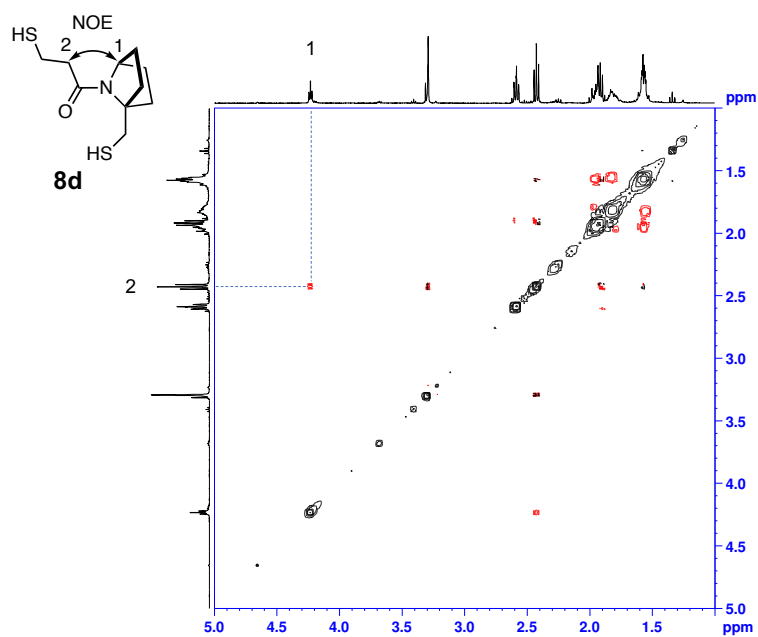

**Figure S7.** NOESY spectrum of **8d** in  $\text{CDCl}_3$  (mixing time = 800 msec).

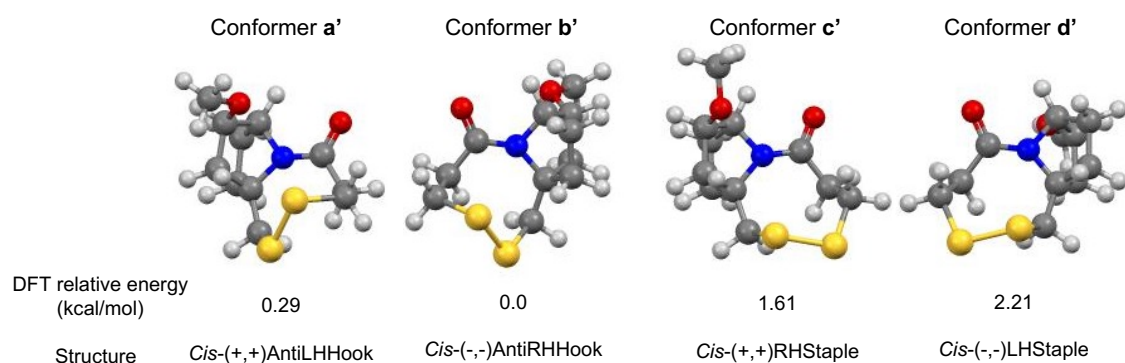

**Figure S8.** DFT-optimized structures of **11b** at the level of APFD/6-311+G(2d,p) (SCRF=IEFPCM, solvent = CHCl<sub>3</sub>).

(a)

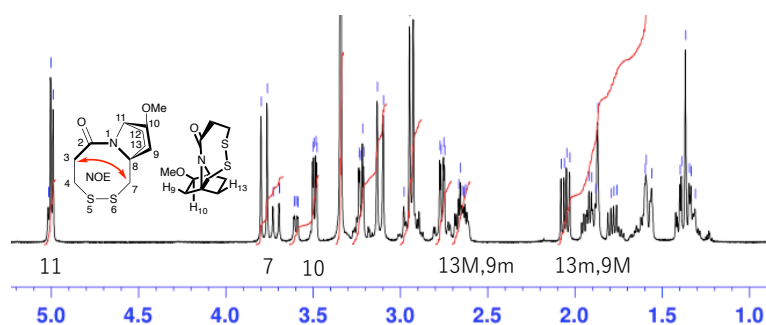

(b)

|     | Experiment ( <sup>1</sup> H-NMR) |           | Calculation (GIAO method) |                     |
|-----|----------------------------------|-----------|---------------------------|---------------------|
|     | major                            | minor     | Conformer <b>b'</b>       | Conformer <b>a'</b> |
| H11 | 4.95                             | 4.96      | 4.95                      | 5.01                |
| H10 | 3.46                             | 3.55      | 3.63                      | 3.75                |
| H9  | 1.52                             | 2.64-2.57 | 1.64                      | 2.97                |
| H13 | 2.64-2.57                        | 1.60-1.57 | 2.88                      | 1.67                |
| H7  | 3.73                             | 3.66      | 3.96                      | 3.86                |

**Figure S9.** (a) <sup>1</sup>H-NMR spectrum of **11b** in CDCl<sub>3</sub> at 273 K. “M” shows the signal of the major conformer and “m” shows the signal of the minor conformer. (b) Prediction of chemical shifts of **11b** by GIAO simulation at the reference of TMS at the level of B3LYP/6-311+G (2d,p).

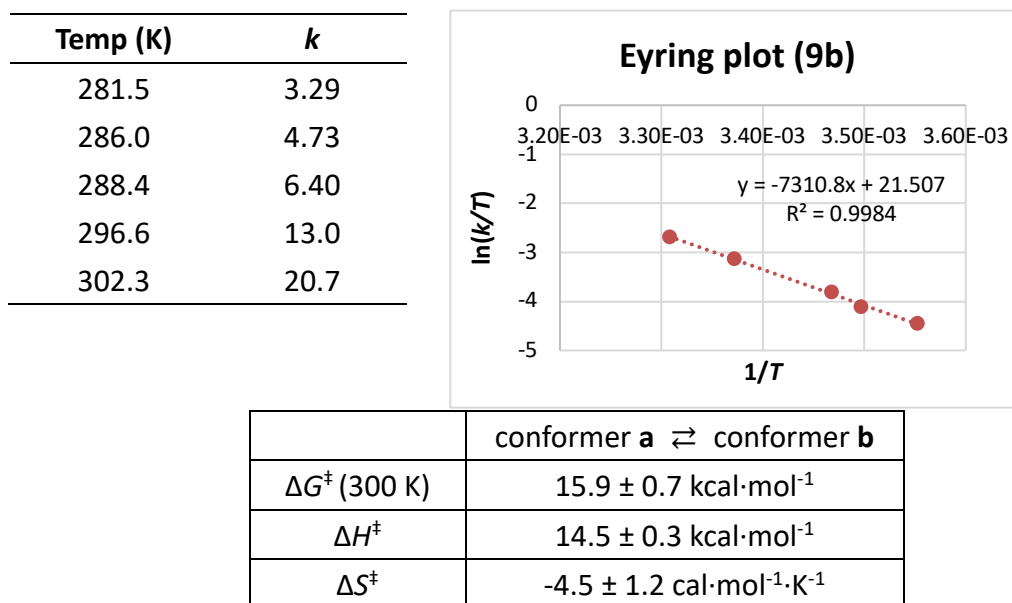

**Figure S10.** The rate (*k*) of disulfide ring isomerization, Eyring plot, and activation parameters for **9b** (CDCl<sub>3</sub>).

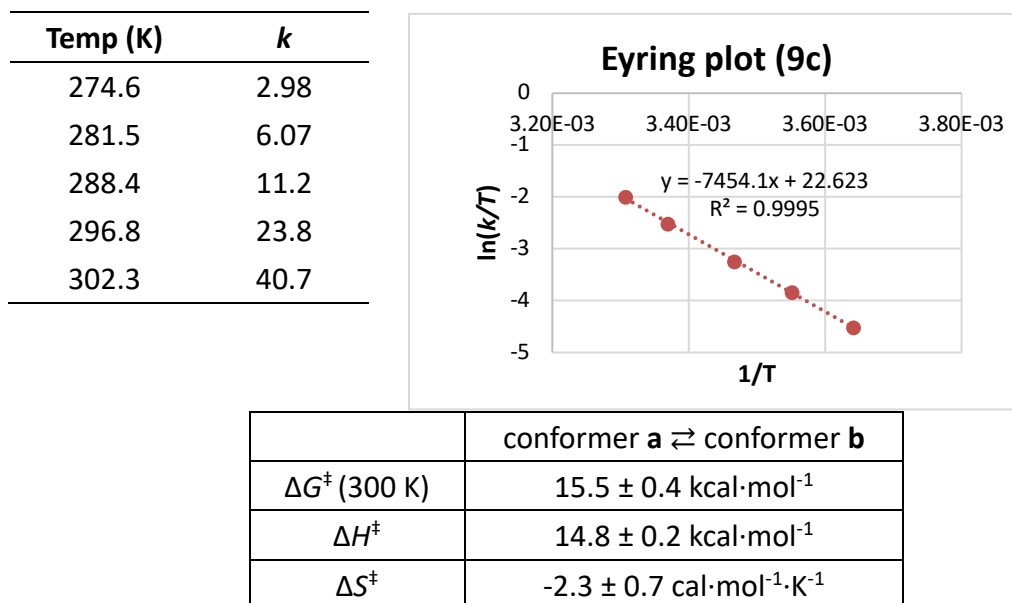

**Figure S11.** The rate (*k*) of disulfide ring isomerization, Eyring plot, and activation parameters for **9c** (CDCl<sub>3</sub>).

| Temp (K) | $k_{b' \rightarrow a'}$ | $k_{a' \rightarrow b'}$ |
|----------|-------------------------|-------------------------|
| 274.6    | 1.29                    | 3.47                    |
| 281.5    | 2.52                    | 7.01                    |
| 288.4    | 5.47                    | 13.9                    |
| 297.1    | 14.8                    | 35.8                    |
| 302.3    | 23.3                    | 56.1                    |

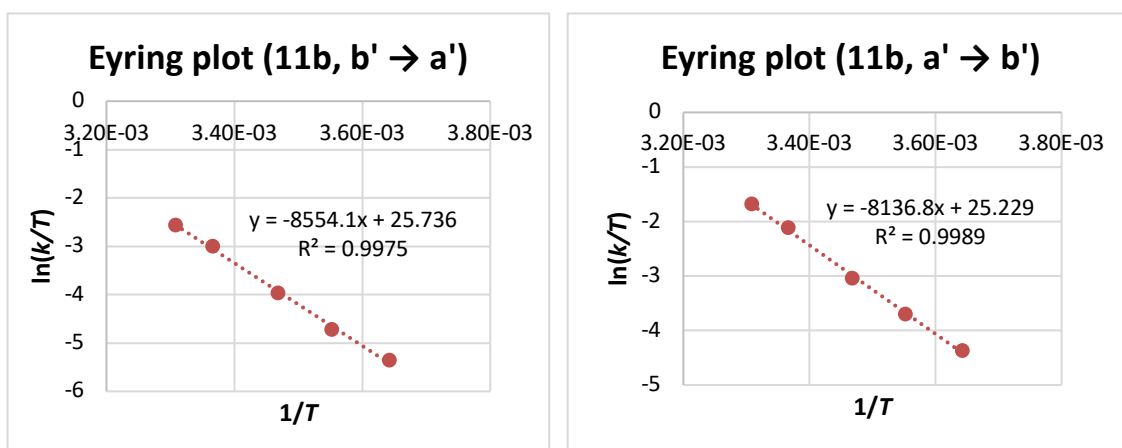

|                             | conformer <b>b'</b> → conformer <b>a'</b>                       | conformer <b>a'</b> → conformer <b>b'</b>                       |
|-----------------------------|-----------------------------------------------------------------|-----------------------------------------------------------------|
| $\Delta G^\ddagger$ (300 K) | $15.8 \pm 1.0 \text{ kcal}\cdot\text{mol}^{-1}$                 | $15.3 \pm 0.6 \text{ kcal}\cdot\text{mol}^{-1}$                 |
| $\Delta H^\ddagger$         | $17.0 \pm 0.5 \text{ kcal}\cdot\text{mol}^{-1}$                 | $16.2 \pm 0.3 \text{ kcal}\cdot\text{mol}^{-1}$                 |
| $\Delta S^\ddagger$         | $3.9 \pm 1.7 \text{ cal}\cdot\text{mol}^{-1}\cdot\text{K}^{-1}$ | $2.9 \pm 1.1 \text{ cal}\cdot\text{mol}^{-1}\cdot\text{K}^{-1}$ |

**Figure S12.** The rate ( $k$ ) of disulfide ring isomerization, Eyring plot, and activation parameters for **11b** ( $\text{CDCl}_3$ ).

| Temp (K) | $k_{b' \rightarrow a'}$ | $k_{a' \rightarrow b'}$ |
|----------|-------------------------|-------------------------|
| 274.6    | 4.0                     | 3.2                     |
| 281.5    | 9.2                     | 7.7                     |
| 288.4    | 18.9                    | 15.9                    |
| 297.1    | 41.4                    | 38.0                    |
| 302.3    | 57.2                    | 55.6                    |

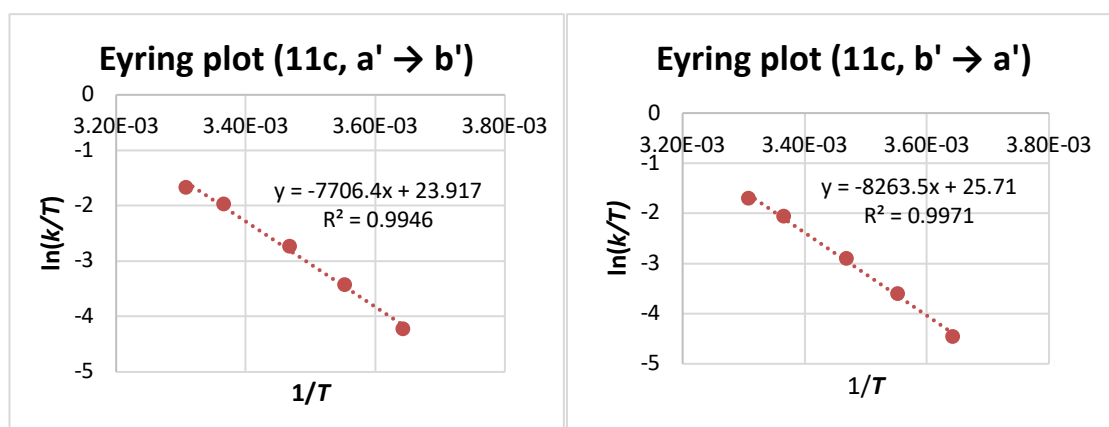

|                             | conformer <b>b'</b> $\rightarrow$ conformer <b>a'</b>            | conformer <b>a'</b> $\rightarrow$ conformer <b>b'</b>            |
|-----------------------------|------------------------------------------------------------------|------------------------------------------------------------------|
| $\Delta G^\ddagger$ (300 K) | $15.5 \pm 1.3 \text{ kcal}\cdot\text{mol}^{-1}$                  | $15.5 \pm 1.0 \text{ kcal}\cdot\text{mol}^{-1}$                  |
| $\Delta H^\ddagger$         | $14.8 \pm 0.7 \text{ kcal}\cdot\text{mol}^{-1}$                  | $14.4 \pm 0.5 \text{ kcal}\cdot\text{mol}^{-1}$                  |
| $\Delta S^\ddagger$         | $-2.3 \pm 2.3 \text{ cal}\cdot\text{mol}^{-1}\cdot\text{K}^{-1}$ | $-3.5 \pm 1.8 \text{ cal}\cdot\text{mol}^{-1}\cdot\text{K}^{-1}$ |

**Figure S13.** The rate ( $k$ ) of disulfide ring isomerization, Eyring plot, and activation parameters for **11c** ( $\text{CDCl}_3$ ).

Variable-temperature NMR

|         | <sup>1</sup> H-NMR<br>(in CDCl <sub>3</sub> ) | Line shape<br>analysis | <i>k</i> (major→minor) | <i>k</i> (minor→major) |
|---------|-----------------------------------------------|------------------------|------------------------|------------------------|
| 311.7 K |                                               |                        | 67.5 Hz                | 124 Hz                 |
| 302.3 K |                                               |                        | 30.2 Hz                | 66.7 Hz                |
| 293.1 K |                                               |                        | 14.6 Hz                | 34.7 Hz                |
| 283.8 K |                                               |                        | 6.77 Hz                | 15.8 Hz                |
| 274.6 K |                                               |                        | 2.17 Hz                | 5.59 Hz                |

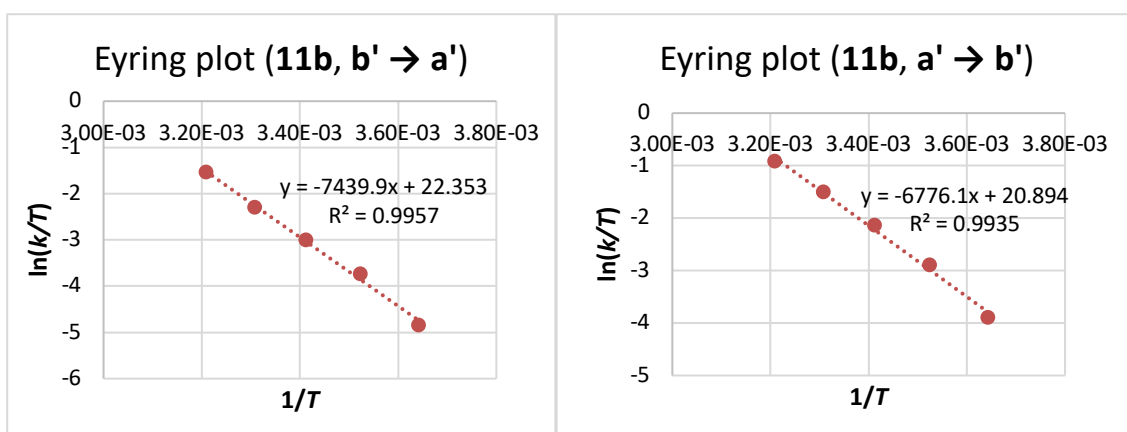

|                             | conformer <b>b'</b> → conformer <b>a'</b>                        | conformer <b>a'</b> → conformer <b>b'</b>                        |
|-----------------------------|------------------------------------------------------------------|------------------------------------------------------------------|
| $\Delta G^\ddagger$ (300 K) | $15.6 \pm 1.1 \text{ kcal}\cdot\text{mol}^{-1}$                  | $15.2 \pm 1.3 \text{ kcal}\cdot\text{mol}^{-1}$                  |
| $\Delta H^\ddagger$         | $14.8 \pm 0.6 \text{ kcal}\cdot\text{mol}^{-1}$                  | $13.5 \pm 0.6 \text{ kcal}\cdot\text{mol}^{-1}$                  |
| $\Delta S^\ddagger$         | $-2.8 \pm 1.9 \text{ cal}\cdot\text{mol}^{-1}\cdot\text{K}^{-1}$ | $-5.7 \pm 2.1 \text{ cal}\cdot\text{mol}^{-1}\cdot\text{K}^{-1}$ |

**Figure S14.** Line-shape analysis. The rate (*k*) of disulfide ring isomerization, Eyring plot, and activation parameters (**11b**).

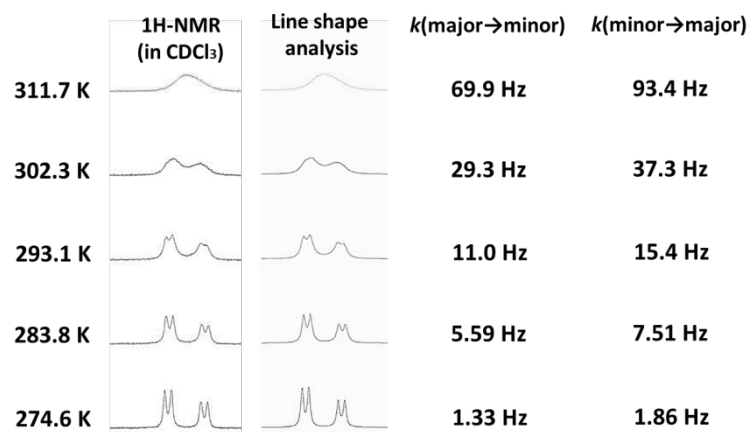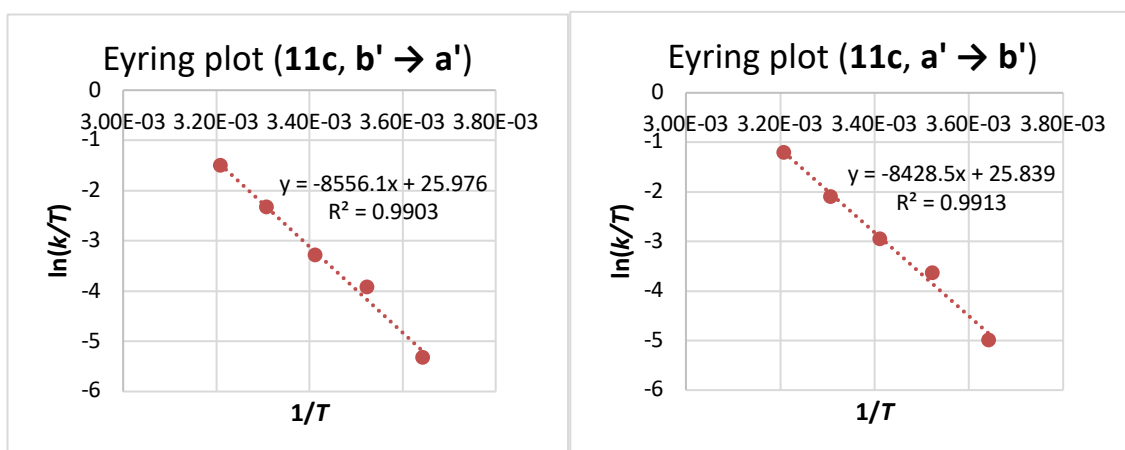

|                             | conformer <b>b'</b> → conformer <b>a'</b>                       | conformer <b>a'</b> → conformer <b>b'</b>                       |
|-----------------------------|-----------------------------------------------------------------|-----------------------------------------------------------------|
| $\Delta G^\ddagger$ (300 K) | $15.7 \pm 2.0 \text{ kcal}\cdot\text{mol}^{-1}$                 | $15.5 \pm 1.8 \text{ kcal}\cdot\text{mol}^{-1}$                 |
| $\Delta H^\ddagger$         | $17.0 \pm 1.0 \text{ kcal}\cdot\text{mol}^{-1}$                 | $16.6 \pm 0.9 \text{ kcal}\cdot\text{mol}^{-1}$                 |
| $\Delta S^\ddagger$         | $4.4 \pm 3.3 \text{ cal}\cdot\text{mol}^{-1}\cdot\text{K}^{-1}$ | $4.1 \pm 3.1 \text{ cal}\cdot\text{mol}^{-1}\cdot\text{K}^{-1}$ |

**Figure S15.** Line-shape analysis. The rate ( $k$ ) of disulfide ring isomerization, Eyring plot, and activation parameters (**11c**).

**Table S1.** Experimental and calculated coupling constants of **9b** based on DFT-optimized structures.

| <sup>3</sup> J coupling constants | Experimental<br>CD <sub>3</sub> OD, 273.2 K | Calculated <sup>a</sup>       |                               |
|-----------------------------------|---------------------------------------------|-------------------------------|-------------------------------|
|                                   |                                             | conformer <b>a</b> / <b>b</b> | conformer <b>c</b> / <b>d</b> |
| <i>J</i> <sub>1</sub>             | 13.2                                        | 12.4                          | 8.2                           |
| <i>J</i> <sub>2</sub>             | 5.2                                         | 3.7                           | 2.1                           |

<sup>a</sup> The coupling constants were calculated based on the DFT-optimized structures at the level of APFD/6-311+G(2d,p) (SCRF = IEFPCM, solvent = CHCl<sub>3</sub>), according to the following Karplus equation<sup>[S1]</sup>:  $J = 9.4\cos^2\theta - 1.4\cos\theta + 1.6$  ( $\theta$  is the torsion angle between hydrogens)

**Table S2.** Dihedral angles of stable conformers **a** and **b** of **9b**.

| Dihedral angle    | Conformer                   |                            |
|-------------------|-----------------------------|----------------------------|
|                   | <b>a</b>                    | <b>b</b>                   |
| $\chi_3$ (CV1)    | -73                         | +73                        |
| $\chi_{1'}$ (CV2) | +72                         | -72                        |
| $\chi_{2'}$       | -28                         | +28                        |
| $\chi_1$          | +59                         | -59                        |
| $\chi_2$          | +57                         | -57                        |
| $\phi_2$          | -6                          | +6                         |
| $\psi_1$          | -96                         | +96                        |
| Conformation      | <i>Cis</i> -(+,+)AntiLHHook | <i>Cis</i> -(,-)AntiRHHook |

**Table S3** Disulfide torsion angle calculated at the APFD/6-311+G(2d,p) level (IEFPCM, solvent = CHCl<sub>3</sub>).

|            | Disulfide ring size | Torsion angle of disulfide |
|------------|---------------------|----------------------------|
| <b>12</b>  | -                   | 79.94°                     |
| <b>9a</b>  | 7                   | 80.19°                     |
| <b>11a</b> | 7                   | -79.81°                    |
| <b>9b</b>  | 8                   | 72.74°                     |
| <b>11b</b> | 8                   | 72.58°                     |
| <b>7b</b>  | 8                   | 93.84°                     |
| <b>4</b>   | 8                   | 92.41°                     |



|            |   |                       |
|------------|---|-----------------------|
| <b>9c</b>  | 9 | 82.39° (Xray: 89.40°) |
| <b>11c</b> | 9 | 90.55°                |

**Table S4.** Rotational barriers of the disulfide bond (**TS1**) calculated at the APFD/6-311+G(2d,p) level (IEFPCM, solvent = CHCl<sub>3</sub>).

| $\Delta G^\ddagger_{300\text{ K}}$ (kcal/mol) ( <b>TS1</b> ) |                     |                                   |                                   |
|--------------------------------------------------------------|---------------------|-----------------------------------|-----------------------------------|
|                                                              | Disulfide ring size | major conformer → minor conformer | minor conformer → major conformer |
| <b>7b</b>                                                    | 8                   | 14.78                             | 14.13                             |
| <b>9b</b>                                                    | 8                   | 16.14                             | 13.79                             |
| <b>9c</b>                                                    | 9                   | 16.48                             | 15.64                             |
| <b>12</b>                                                    | -                   | 9.04                              |                                   |
| <b>4</b>                                                     | 8                   | 15.95                             | 15.07                             |
| <b>CC_9b</b>                                                 | -(8)                | 11.89                             | 9.96                              |

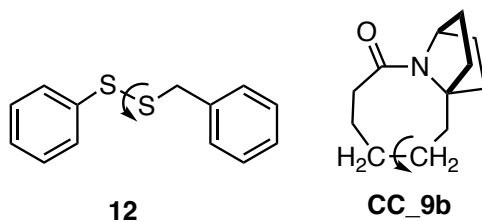

## Cyclic Voltammetry Studies

### Procedure for cyclic voltammetry measurement

Cyclic voltammetry measurements were carried out using ECstat-301. A 3 mM solution of the substrate in 2 mL 0.1 M TBAPF<sub>6</sub>/CH<sub>3</sub>CN was placed in a beaker-type glass cell. Cyclic voltammogram was measured with a scan rate of 100 mV s<sup>-1</sup> using a grassy carbon as a working electrode (WE), a Pt wire as a counter electrode (CE), and Ag/Ag<sup>+</sup> (in 3.33 M KCl aq.) as a reference electrode (RE).<sup>[S2][S3]</sup>

**Instrument settings:** Dimensions: WE to RE: 8.0 mm, WE to RE: 6.0 mm, CE to RE: 6.0 mm, Surface area of WE: 7.07 mm<sup>2</sup>.

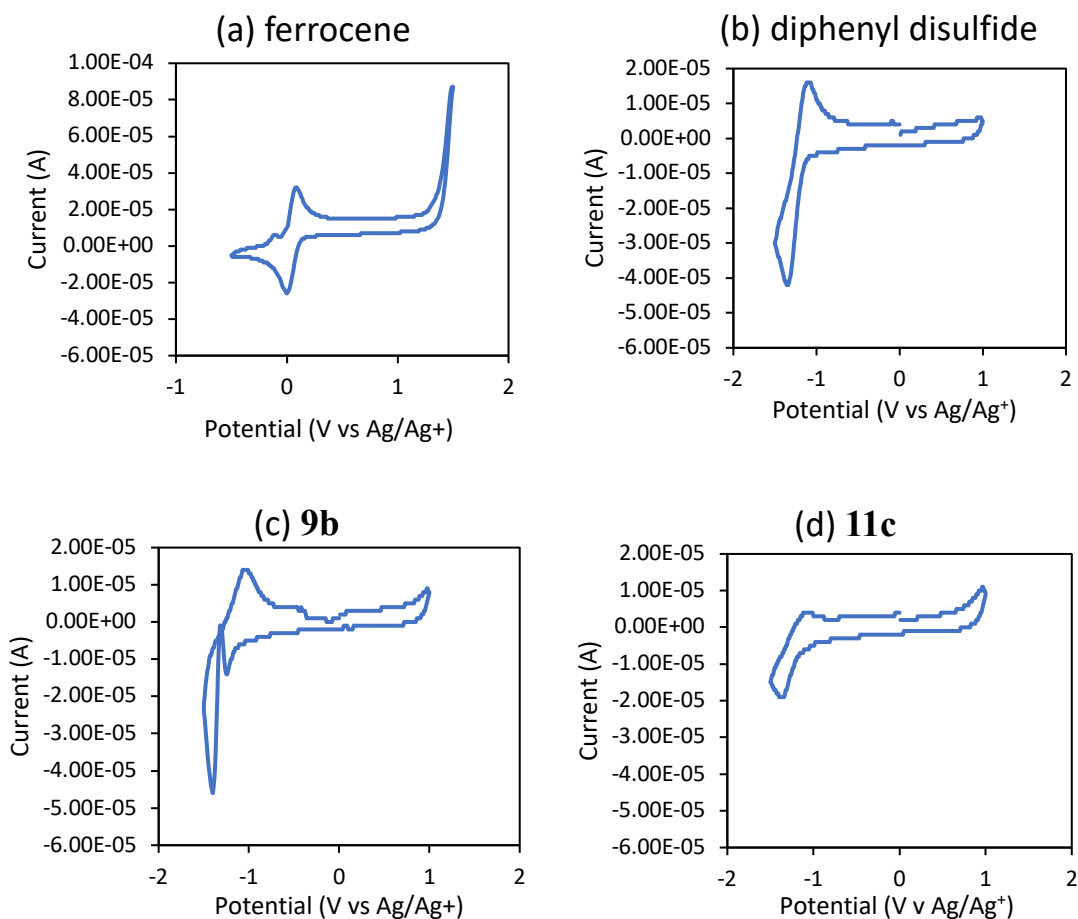

**Figure S16.** Cyclic voltammograms measured in 0.1 M TBAPF<sub>6</sub>/CH<sub>3</sub>CN at a scan rate of 100 mV s<sup>-1</sup>: (a) ferrocene ( $E^{pc} = +0.38$  V (vs SCE)), (b) diphenyl disulfide ( $E^{pc} = -1.0$  V (vs SCE)), (c) **9b** ( $E^{pc} = -1.06$  V (vs SCE)), and (d) **11c** ( $E^{pc} = -1.02$  V (vs SCE)).

## 2. Experimental Section

### General Methods

Unless stated otherwise, commercial grade reagents were used without further purification. Open column chromatography was carried out using Kanto chemical silica gel (silica gel 60 N (100-210  $\mu\text{m}$ )).  $^1\text{H}$ -NMR (400 MHz) spectra,  $^{13}\text{C}$ -NMR (100 MHz) spectra and 2D (COSY, TOCSY, HSQC, and NOESY) were recorded on a Bruker Avance 400 NMR spectrometer running Topspin. The spectra were recorded at 22  $^\circ\text{C}$ , unless otherwise noted.  $^1\text{H}$ -NMR and  $^{13}\text{C}$ -NMR chemical shifts ( $\delta$ ) are given in parts per million (ppm) and coupling constants are given in hertz (Hz). s = singlet, brs = broad singlet, d = doublet, t = triplet, m = multiplet. Data for  $^1\text{H}$  NMR spectra are reported in terms of chemical shift (ppm) relative to residual solvent signals ( $\text{CDCl}_3$ : 7.26 ppm,  $\text{CD}_3\text{OD}$ : 3.31 ppm,  $\text{DMSO}-d_6$ : 2.50 ppm). Data for  $^{13}\text{C}\{^1\text{H}\}$  NMR spectra are reported in terms of chemical shift (ppm) relative to residual solvent peak ( $\text{CDCl}_3$ : 77.0 ppm,  $\text{CD}_3\text{OD}$ : 49.0 ppm). All  $^1\text{H}$ -NMR signals are assigned by 2D-NMR.

The EXSY spectra were recorded with 6 mixing times ( $T_m$ ) of 20, 40, 60, 100, 200, and 300 ms at 274.6 K, 281.5 K, 288.4 K, 297.1 K, and 302.3 K. The  $90^\circ$  pulse widths were estimated by a standard method. The temperature was calibrated with methanol as a reference by using a standard method. Parameters were obtained from unbiased estimates of the standard deviations of least-squares parameters and are reported at the 95% confidence level. Line shape analysis was carried out with DNMR software (Bruker Biospin) and was performed by iterative matching of simulated spectra with the experimental spectra.

Electron spray ionization time-of-flight mass spectra (ESI-TOF MS) were recorded on a Bruker micrOTOF-05. The combustion analysis was carried out in the microanalytical laboratory of the University of Tokyo. All melting points were measured with a Yanaco Micro Melting Point Apparatus without correction.

HPLC data were obtained with the following conditions: HPLC Column: Cosmosil 5C<sub>18</sub>-AR-II, Waters, 10 mm ID x 250 mm,  $\text{CH}_3\text{CN}/\text{H}_2\text{O}$ =9:1 or 7:3, flow rate 2.0 ml/min, UV detection at 210 nm.

## X-ray Crystallographic analysis

### X-ray Crystallographic data of 9c (CCDS No. 2332996)

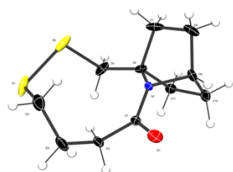

|                                   |                                                                                                              |
|-----------------------------------|--------------------------------------------------------------------------------------------------------------|
| Empirical formula                 | C <sub>11</sub> H <sub>17</sub> N O S <sub>2</sub>                                                           |
| Formula weight                    | 243.37                                                                                                       |
| Temperature                       | 100(2) K                                                                                                     |
| Wavelength                        | 0.71073 Å                                                                                                    |
| Crystal system                    | Monoclinic                                                                                                   |
| Space group                       | P2 <sub>1</sub> /c                                                                                           |
| Unit cell dimensions              | a = 15.8974(17) Å      α = 90°.<br>b = 7.8350(8) Å      β = 100.6820(10)°.<br>c = 9.4791(10) Å      γ = 90°. |
| Volume                            | 1160.2(2) Å <sup>3</sup>                                                                                     |
| Z                                 | 4                                                                                                            |
| Density (calculated)              | 1.393 Mg/m <sup>3</sup>                                                                                      |
| Absorption coefficient            | 0.432 mm <sup>-1</sup>                                                                                       |
| F(000)                            | 520                                                                                                          |
| Crystal size                      | 0.300 x 0.200 x 0.200 mm <sup>3</sup>                                                                        |
| Theta range for data collection   | 1.303 to 26.120°.                                                                                            |
| Index ranges                      | -19 ≤ h ≤ 18, -9 ≤ k ≤ 9, -11 ≤ l ≤ 11                                                                       |
| Reflections collected             | 10161                                                                                                        |
| Independent reflections           | 2150 [R(int) = 0.0333]                                                                                       |
| Completeness to theta = 25.242°   | 98.9 %                                                                                                       |
| Absorption correction             | Empirical                                                                                                    |
| Max. and min. transmission        | 0.9281 and 0.8477                                                                                            |
| Refinement method                 | Full-matrix least-squares on F <sup>2</sup>                                                                  |
| Data / restraints / parameters    | 2150 / 0 / 136                                                                                               |
| Goodness-of-fit on F <sup>2</sup> | 1.062                                                                                                        |
| Final R indices [I > 2σ(I)]       | R1 = 0.0460, wR2 = 0.1043                                                                                    |
| R indices (all data)              | R1 = 0.0505, wR2 = 0.1078                                                                                    |
| Extinction coefficient            | n/a                                                                                                          |
| Largest diff. peak and hole       | 0.468 and -0.933 e.Å <sup>-3</sup>                                                                           |

## Synthesis

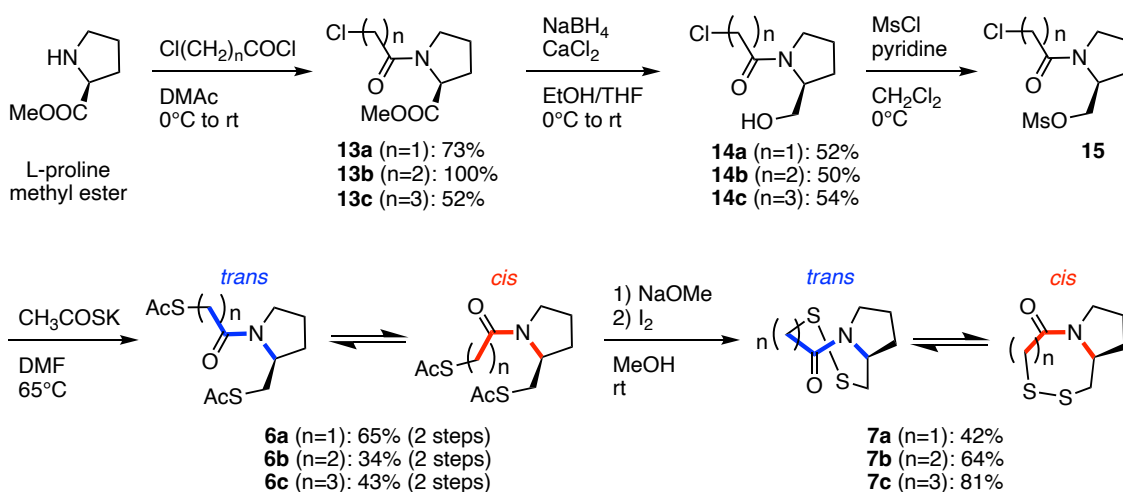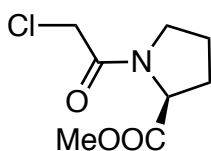

### 13a

To a solution of proline methyl ester hydrochloride (443.6 mg, 2.68 mmol) in dimethylacetamide (DMAc) (20 mL) was added chloroacetyl chloride (0.26 mL, 3.22 mmol) at 0°C for 20 min and the mixture was stirred at rt for 18 h. Water (40 mL) was added to the mixture, and the mixture was extracted with AcOEt (50 mL  $\times$  3). The organic layer was combined, dried over Na<sub>2</sub>SO<sub>4</sub>, and evaporated. The crude was purified by column-chromatography (eluent: n-hexane: AcOEt = 1: 2) to give **14a** (401.1 mg, 73%) as a colorless oil.

<sup>1</sup>H NMR (400 MHz, CDCl<sub>3</sub>) (a mixture of rotamers):  $\delta$  4.56-4.45 (1H, m), 4.08-3.87 (2H, m), 3.73-3.69 (3H, m), 3.67-3.56 (2H, m), 2.23-1.95 (4H, m).

<sup>13</sup>C{<sup>1</sup>H} NMR (100 MHz, CDCl<sub>3</sub>) (a mixture of rotamers):  $\delta$  172.2, 172.1, 165.4, 165.1, 59.4, 59.2, 52.9, 52.4, 47.10, 47.07, 41.9, 41.8, 31.3, 29.1, 24.9, 22.3.

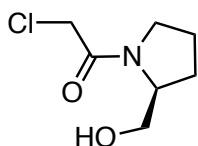

### 14a

To a solution of **13a** (974.3 mg, 4.74 mmol) in ethanol (EtOH) (18 mL) and tetrahydrofuran (THF) (12 mL) were added calcium chloride (CaCl<sub>2</sub>) (1.18 g, 10.62

mmol) and sodium borohydride ( $\text{NaBH}_4$ ) (653.8 mg, 17.28 mmol) at  $0^\circ\text{C}$ . The reaction mixture was stirred at rt for 50 min. A 5% solution of  $\text{KHSO}_4$  (25 mL) was added at  $0^\circ\text{C}$  and the mixture was filtered through Celite and the solid was washed with AcOEt (40 mL  $\times$  3) and with water (30 mL). The whole was extracted with AcOEt (50 mL  $\times$  3). The combined organic layer was washed with brine (30 mL), dried over  $\text{Na}_2\text{SO}_4$  and evaporated to give a crude mixture, which was purified by column-chromatography (eluent: n-hexane: AcOEt= 1: 2 - 1: 5) to give **14a** (435.2 mg, 2.45 mmol, 52%) as a colorless oil.

$^1\text{H}$  NMR (400 MHz,  $\text{CDCl}_3$ ) (a mixture of rotamers):  $\delta$  4.25-4.18 (1H, m), 4.07 (2H, s), 3.74-3.51 (4H, m), 2.17-1.63 (4H, m).

$^{13}\text{C}\{^1\text{H}\}$  NMR (100 MHz,  $\text{CDCl}_3$ ) (a mixture of rotamers):  $\delta$  167.2, 65.9, 61.7, 59.4, 48.0, 46.1, 42.5, 28.2, 28.0, 24.4, 21.9.

HRMS (ESI<sup>+</sup>,  $m/z$ ): Calcd. for  $\text{C}_7\text{H}_{13}\text{ClNO}_2^+$  ( $[\text{M}+\text{H}]^+$ ): 178.0629. Found: 178.0603.

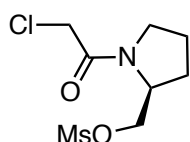

### 15a

To a solution of **14a** (435.2 mg, 2.45 mmol) in anhydrous  $\text{CH}_2\text{Cl}_2$  (15 mL) was added  $\text{Et}_3\text{N}$  (640  $\mu\text{L}$ ) at  $0^\circ\text{C}$ . Methanesulfonyl chloride (330  $\mu\text{L}$ , 4.22 mmol) was added slowly to the mixture and the reaction mixture was stirred at  $0^\circ\text{C}$  for 50 min.  $\text{CH}_2\text{Cl}_2$  (50 mL) was added in the mixture and the whole was washed with water (30 mL  $\times$  2), saturated aqueous solution of  $\text{NH}_4\text{Cl}$  (30 mL  $\times$  2), saturated aqueous solution of  $\text{NaHCO}_3$  (30 mL  $\times$  2) and brine (20 mL), dried over  $\text{Na}_2\text{SO}_4$  and evaporated to give **15a** (398.8 mg, 1.53 mmol, 62%) as a deep brown oil, which was used for the next reaction without further purification.

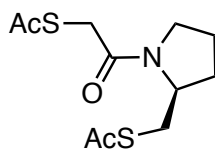

### 6a

To a solution of **14a** (398.8 mg, 1.53 mmol) in anhydrous N, N-dimethylformamide (DMF) (16 mL) was added potassium thioacetate (664.8 mg, 5.82 mmol). The reaction mixture was stirred at  $65^\circ\text{C}$  under Ar atmosphere for 1 h.  $\text{Et}_2\text{O}$  (30 mL) was added to the mixture and the whole was washed with water (30 mL) and brine (20 mL). The combined

aqueous layer was extracted with Et<sub>2</sub>O five times. The combined organic layer was dried over Na<sub>2</sub>SO<sub>4</sub> and evaporated to give a crude mixture, which was purified by column-chromatography (eluent: n-hexane: AcOEt= 1: 1) to give **6a** (279.2 mg, 1.01 mmol, 65%) as deep brown oil.

<sup>1</sup>H-NMR (400 MHz, MeOD) (a mixture of rotamers): δ 4.24-4.16 (1H, m), 4.04-3.78 (2H, m), 3.67-3.45 (2H, m), 3.23-2.82 (2H, m), 2.37-2.33 (6H, m), 2.13-1.74 (4H, m).

<sup>13</sup>C{<sup>1</sup>H} NMR (100 MHz, MeOD) (a mixture of rotamers): δ 196.9, 196.5, 196.4, 195.9, 169.1, 168.7, 59.2, 58.8, 33.5, 33.2, 33.0, 31.2, 30.9, 30.44, 30.41, 30.0, 29.9, 29.5, 24.8, 22.2.

HRMS (ESI<sup>+</sup>, *m/z*): Calcd. for C<sub>11</sub>H<sub>17</sub>NNaO<sub>3</sub>S<sub>2</sub><sup>+</sup> ([M+Na]<sup>+</sup>): 298.0542. Found: 298.0547.

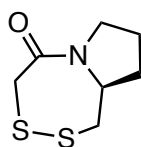

#### 7a

A solution of **6a** (99.2 mg, 0.36 mmol) in anhydrous MeOH (20 mL) was bubbled with N<sub>2</sub> for 20 min, and 28% sodium methoxide (NaOMe) in MeOH (150 μL, 0.77 mmol) was added to the solution. The reaction mixture was stirred at rt under N<sub>2</sub> flow for 20 min. A solution of I<sub>2</sub> (213.6 mg, 1.68 mmol) in Et<sub>2</sub>O (3 mL) was added to the reaction mixture dropwise until the color became pale. The reaction mixture was stirred at rt under N<sub>2</sub> flow for 30 min. Aqueous 10% Na<sub>2</sub>S<sub>2</sub>O<sub>3</sub> (10 mL) was added to the solution and the mixture was evaporated to remove MeOH solvent. The solution was extracted with AcOEt (30 mL × 3), and the organic layer was washed with saturated aqueous solution of NH<sub>4</sub>Cl (30 mL), dried over Na<sub>2</sub>SO<sub>4</sub> and evaporated to give a crude, which was purified by column-chromatography (eluent: n-hexane: EtOH= 3: 1) to give **7a** (43.7 mg, 0.23 mmol, 64%) as a brown oil.

<sup>1</sup>H-NMR (400 MHz, DMSO-*d*<sub>6</sub>) (a mixture of rotamers): δ 4.40 (1H, m), 4.00 (1H, d, J=14.4 Hz), 3.48 (1H, d, J=14.4 Hz) 3.46-3.31 (2H, m), 2.93-2.88 (2H, m), 2.18-1.76 (4H, m).

<sup>13</sup>C{<sup>1</sup>H} NMR (100 MHz, DMSO-*d*<sub>6</sub>): (a mixture of rotamers) δ 169.4, 61.2, 46.7, 43.6, 38.5, 33.4, 21.8.

HRMS (ESI<sup>+</sup>, *m/z*): Calcd. for C<sub>8</sub>H<sub>15</sub>NNaOS<sub>2</sub><sup>+</sup> ([M+Na]<sup>+</sup>): 228.0487. Found: 228.0496.

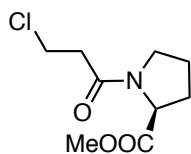

### 13b

To a solution of proline methyl ester hydrochloride (3.7217 g, 22.6 mmol) in DMAc (40 mL) was added 3-chloropropionyl chloride (2.5 mL) at 0°C for 20 min and at rt for 18 h. Water (40 mL) was added to the mixture, which was extracted with AcOEt (50 mL × 3). The organic layer was combined, dried over Na<sub>2</sub>SO<sub>4</sub> and evaporated. The crude was purified by column-chromatography (eluent: n-hexane: AcOEt=1:2) to give **13b** (4.01 g, 18.56 mmol, 82%) as a colorless oil.

<sup>1</sup>H (400 MHz, CDCl<sub>3</sub>) (a mixture of rotamers): δ 4.51-4.42 (1H, m), 3.76-3.71 (3H, m), 3.68-3.49 (4H, m), 2.98-2.75 (2H, m), 2.21-2.00 (4H, m)

<sup>13</sup>C{<sup>1</sup>H} NMR (100 MHz, CDCl<sub>3</sub>) (a mixture of rotamers): δ 172.7, 168.6, 60.5, 58.7, 52.4, 47.1, 46.5, 39.5, 37.6, 37.5, 31.5, 29.3, 24.8, 22.7, 14.3.

HRMS (ESI<sup>+</sup>, *m/z*) Calcd. for C<sub>9</sub>H<sub>14</sub>ClNO<sub>3</sub>Na<sup>+</sup> ([M+Na]<sup>+</sup>) 242.0554. Found:242.0558.

Anal.Calcd. for C<sub>9</sub>H<sub>14</sub>ClNO<sub>3</sub>: C, 49.21; H, 6.42; N, 6.38. Found: C, 48.84; H, 6.25; N, 6.31.

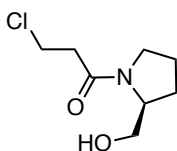

### 14b

To a solution of **13b** (5.1432 g, 23.48 mmol) in EtOH (90 mL) and THF (60 mL) were added CaCl<sub>2</sub> (5.4152 g, 48.79 mmol) and NaBH<sub>4</sub> (3.8158 g, 100.87 mmol) at 0°C. The reaction mixture was stirred at rt for 50 min. A 5% solution of KHSO<sub>4</sub> (25 mL) was added at 0°C and the mixture was filtered through Celite and the solid was washed with AcOEt (50 mL × 5) and with water (100 mL). The whole was extracted with AcOEt (200 mL × 5). The combined organic layer was washed with brine (30 mL), dried over Na<sub>2</sub>SO<sub>4</sub> and evaporated to give a crude mixture, which was purified by column-chromatography (eluent: hexane: AcOEt = 1:3- AcOEt) to give **14b** (2.2228 g, 11.64 mmol, 50%) as a colorless oil.

<sup>1</sup>H NMR (400 MHz, CDCl<sub>3</sub>) (a mixture of rotamers): δ 4.69 (1H, br), 4.25-4.18 (1H, m), 3.70-3.45 (6H, m), 2.92-2.78 (2H, m), 2.09-1.823 (4H, m)

<sup>13</sup>C{<sup>1</sup>H} NMR (100 MHz, CDCl<sub>3</sub>) (a mixture of rotamers): δ 171.2, 67.1, 67.1, 61.4, 60.5,



48.3, 48.2, 38.2, 28.3, 26.9, 24.1, 21.1, 14.3.

HRMS (ESI<sup>+</sup>, *m/z*) Calcd. for C<sub>8</sub>H<sub>15</sub>ClNO<sub>2</sub><sup>+</sup> ([M+H]<sup>+</sup>) 192.0786. Found: 192.0774.

Anal. Calcd. for C<sub>8</sub>H<sub>14</sub>ClNO<sub>2</sub>: C, 50.14; H, 7.36; N, 7.31. Found: C, 50.27; H, 7.86; N, 7.57.

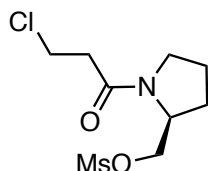

### 15b

To a solution of **14b** (2.223 g, 11.63 mmol) in anhydrous CH<sub>2</sub>Cl<sub>2</sub> (70 mL) was added pyridine (1.8 mL, 22.75 mmol) at 0°C. A solution of methanesulfonyl chloride (1.8 mL, 23.2 mmol) was added dropwise to the mixture and the reaction mixture was stirred at 0°C for 50 min. CH<sub>2</sub>Cl<sub>2</sub> (20 mL) was added in the mixture and the whole was washed with water (60 mL × 2), saturated aqueous solution of saturated aqueous solution of NH<sub>4</sub>Cl (80 mL × 3) and brine (50 mL), dried over Na<sub>2</sub>SO<sub>4</sub> and evaporated to give **15b** (3.7539 g, >100%) as a yellow oil, which was used for the next reaction without further purification.

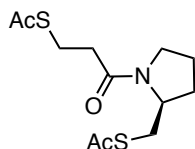

### 6b

To a solution of **15b** (3.7539 g) in anhydrous DMF (100 mL) was added potassium thioacetate (5.6027 g, 49.06 mmol). The reaction mixture was stirred at 65°C under Ar atmosphere for 2 h. Et<sub>2</sub>O (40 mL) was added to mixture and the whole was washed with water (30 mL) and brine (20 mL). The combined aqueous layer was extracted with Et<sub>2</sub>O five times. The combined organic layer was dried over Na<sub>2</sub>SO<sub>4</sub> and evaporated to give a crude, which was purified by column-chromatography (eluent: n-hexane: AcOEt= 1:1) to give **6b** (1.1162 g, 3.86 mmol, 34% from **14b**) as deep brown oil.

<sup>1</sup>H NMR (400 MHz, MeOD) (a mixture of rotamers): δ 4.19-4.09 (1H, m), 3.52-3.44 (2H, m), 3.20-3.09 (4H, m), 2.90-2.82 (1H, m), 2.61 (1H, m), 2.35-2.31 (6H, m), 2.01-1.73 (4H, m).

<sup>13</sup>C{<sup>1</sup>H} NMR (100 MHz, CDCl<sub>3</sub>) (a mixture of rotamers): δ 197.4, 197.3, 196.59, 196.57, 172.3, 172.0, 59.5, 58.8, 58.3, 45.2, 35.8, 35.2, 32.9, 31.4, 30.9, 30.5, 30.5, 30.1, 29.5, 28.8, 28.8, 25.7, 25.2, 24.7, 22.3.

HRMS(ESI<sup>+</sup>, *m/z*) Calcd. for C<sub>12</sub>H<sub>20</sub>NO<sub>3</sub>S<sub>2</sub><sup>+</sup> ([M+H]<sup>+</sup>) 290.0829. Found: 290.0889.

Anal. Calcd. for C<sub>12</sub>H<sub>19</sub>NO<sub>3</sub>S<sub>2</sub>: C, 49.80; H, 6.62; N, 4.84. Found: C, 49.83; H, 6.79; N, 5.09.

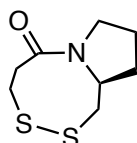

### 7b

A solution of **6b** (278.6 mg, 0.96 mmol) in anhydrous MeOH (160 mL) was bubbled with N<sub>2</sub> for 1 h, and 28% sodium methoxide (NaOMe) in MeOH (450 μL, 2.32 mmol) was added to the solution. The reaction mixture was stirred at rt under N<sub>2</sub> flow for 35 min. A solution of I<sub>2</sub> (766.1 mg, 6.04 mmol) in Et<sub>2</sub>O (9 mL) was added to the reaction mixture dropwise until the color became pale. The reaction mixture was stirred at rt under N<sub>2</sub> flow for 30 min. Aqueous 10% Na<sub>2</sub>S<sub>2</sub>O<sub>3</sub> (20 mL) was added to the solution and the mixture was evaporated to remove MeOH solvent. The solution was extracted with AcOEt (50 mL × 3), and the organic layer was washed with washed with saturated aqueous solution of NH<sub>4</sub>Cl (30 mL), dried over Na<sub>2</sub>SO<sub>4</sub> and evaporated to give a crude, which was purified by column-chromatography (eluent: n-hexane: EtOH= 3:1) to give **7b** (81.9 mg, 0.403 mmol, 42%) as a pale-yellow oil.

<sup>1</sup>H NMR (400 MHz, MeOD) (a mixture of rotamers): δ 4.52-4.48 (m, 1H), 3.59-3.54 (m, 1H), 3.49-3.08 (m, 3H), 2.97-2.88 (m, 2H), 2.86-2.60 (m, 2H), 2.20-2.13 (m, 1H), 1.99-1.95 (m, 2H), 1.85-1.79 (m, 1H).

<sup>13</sup>C{<sup>1</sup>H} NMR (100 MHz, CDCl<sub>3</sub>) (a mixture of rotamers): δ 173.7, 171.89, 171.86, 171.6, 63.6, 59.1, 58.1, 57.9, 56.8, 47.4, 46.4, 45.0, 42.2, 37.4, 37.0, 36.5, 35.3, 34.5, 34.4, 33.6, 30.5, 30.2, 30.2, 25.5, 25.0, 22.9, 22.6, 22.5.

HRMS (ESI<sup>+</sup>, *m/z*) Calcd. for C<sub>8</sub>H<sub>14</sub>NOS<sub>2</sub><sup>+</sup> ([M+H]<sup>+</sup>) 204.0511. Found: 204.0527.

Anal. Calcd. for C<sub>8</sub>H<sub>13</sub>NOS<sub>2</sub>: C, 47.26; H, 6.45; N, 6.89. Found: C, 47.26; H, 6.47; N, 6.83.

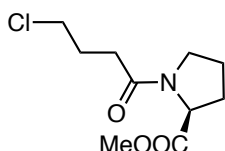

### 13c

To a solution of proline methyl ester hydrochloride (2.1886 g, 13.2 mmol) in DMAc (40

mL) was added 4-chloropropionyl chloride at 0°C for 20 min and at rt for 18 h. Water (40 mL) was added to the mixture, which was extracted with AcOEt (50 mL × 3). The organic layer was washed with saturated aqueous solution of NaHCO<sub>3</sub> (50 mL × 2) and saturated aqueous solution of NH<sub>4</sub>Cl (50 mL × 2), dried over Na<sub>2</sub>SO<sub>4</sub> and evaporated. The crude was purified by column-chromatography (eluent: n-hexane: AcOEt = 1:2) to give **13c** (1.5894 g, 52%) as a colorless oil.

<sup>1</sup>H NMR (400 MHz, CDCl<sub>3</sub>) (a mixture of rotamers): δ 4.48-4.45 (m, 1H), 3.75-3.71 (d, 3H, J=17.2 Hz), 3.68-5.59 (m, 2H), 3.55-3.51 (m, 2H), 2.52-2.47 (m, 2H), 2.21-1.99 (m, 6H).

<sup>13</sup>C{<sup>1</sup>H} NMR (100 MHz, CDCl<sub>3</sub>) (a mixture of rotamers): δ 172.78, 172.77, 172.6, 170.64, 170.57, 59.3, 58.6, 52.3, 52.14, 52.13, 47.0, 46.3, 44.8, 44.7, 31.4, 30.9, 30.7, 29.2, 27.6, 27.4, 24.7, 22.5.

HRMS (ESI<sup>+</sup>, *m/z*) Calcd. for C<sub>10</sub>H<sub>16</sub>ClNO<sub>3</sub>Na<sup>+</sup> ([M+Na]<sup>+</sup>) 256.0711. Found:256.0710.

Anal. Calcd. for C<sub>10</sub>H<sub>16</sub>ClNO<sub>3</sub>: C, 51.40; H, 6.90; N, 5.99. Found: C, 51.22; H, 6.77; N, 6.08.

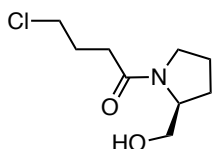

#### **14c**

To a solution of **13c** (1.4894 g, 6.36 mmol) in THF/EtOH (20 mL/ 30 mL) were added NaBH<sub>4</sub> (523.6 mg, 13.84 mmol) at 0°C. The reaction mixture was stirred for 50 min, rt for 1 h. Then a 5% solution of KHSO<sub>4</sub> (25 mL) was added at 0°C and the mixture was extracted with AcOEt (50 mL × 5). The combined organic layer was washed with saturated aqueous solution of NaHCO<sub>3</sub> (50 mL), saturated aqueous solution of NH<sub>4</sub>Cl (20 mL) and brine (30 mL), dried over Na<sub>2</sub>SO<sub>4</sub> and evaporated to give crude mixture, which was purified by column-chromatography (eluent: hexane: AcOEt = 1:2 – AcOEt) to give **14c** (704.5 mg, 54%) as a colorless oil.

<sup>1</sup>H NMR (400 MHz, CDCl<sub>3</sub>) (a mixture of rotamers): d 5.04-4.56 (1H, m), 4.37-4.01 (1H, m), 3.67-3.47 (6H, m), 2.52-2.49 (2H, m), 2.17-1.88 (6H, m).

<sup>13</sup>C{<sup>1</sup>H} NMR (100 MHz, CDCl<sub>3</sub>) (a mixture of rotamers): δ 173.1, 67.20, 67.18, 61.2, 48.1, 44.8, 31.6, 28.3, 27.5, 24.4.

HRMS (ESI<sup>+</sup>, *m/z*) Calcd. for C<sub>9</sub>H<sub>16</sub>ClNO<sub>2</sub>Na<sup>+</sup> ([M+Na]<sup>+</sup>) 228.0762. Found: 228.0733.

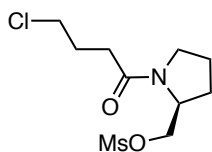

### 15c

To a solution of **14c** (189.5 mg, 0.92 mmol) in anhydrous  $\text{CH}_2\text{Cl}_2$  (20 mL) was added pyridine (0.12 mL, 1.52 mmol) at  $0^\circ\text{C}$ . Methanesulfonyl chloride (85  $\mu\text{L}$ , 1.10 mmol) was added dropwise and the reaction mixture was stirred at  $0^\circ\text{C}$  for 50 min.  $\text{CH}_2\text{Cl}_2$  (20 mL) was added to the mixture and the whole was washed with water (60 mL  $\times$  2), saturated aqueous solution of  $\text{NH}_4\text{Cl}$  (80 mL  $\times$  3) and brine (50 mL), dried over  $\text{Na}_2\text{SO}_4$  and evaporated to give **4c** (170.3 mg, 65%) as oil, which was used for the next reaction without further purification.

HRMS (ESI<sup>+</sup>, *m/z*) Calcd. for  $\text{C}_{10}\text{H}_{19}\text{ClNO}_4\text{S}^+$  ( $[\text{M}+\text{H}]^+$ ) 284.0718. Found: 284.0723.

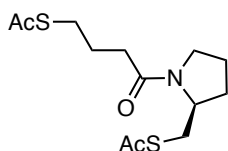

### 6c

To a solution of **15c** (170.3 mg, 0.61 mmol) in anhydrous DMF (15 mL) was added potassium thioacetate (306.1 mg, 2.17 mmol). The reaction mixture was stirred at  $65^\circ\text{C}$  under Ar atmosphere for 4 h. AcOEt (40 mL) was added to the mixture and the whole was washed with water (30 mL), saturated aqueous solution of  $\text{NaHCO}_3$  (20 mL  $\times$  2), saturated aqueous solution of  $\text{NH}_4\text{Cl}$  (20 mL  $\times$  2) and brine (20 mL). The combined aqueous layer was extracted with AcOEt 5 times. The combined organic layer was dried over  $\text{Na}_2\text{SO}_4$  and evaporated to give a crude, which was purified by column-chromatography (eluent: n-hexane: AcOEt=1:1) to give **6c** (120.4 mg, 0.40 mmol, 43%) as a deep brown oil.

$^1\text{H}$  NMR (400 MHz, MeOD) (a mixture of rotamers):  $\delta$  4.22-4.02 (1H, m), 3.55-3.47 (2H, m), 3.22-3.19 (2H, m), 2.99-2.93 (2H, m), 2.39-2.34 (6H, m), 2.01-1.78 (6H, m).

$^{13}\text{C}\{^1\text{H}\}$  NMR (100 MHz,  $\text{CDCl}_3$ ) (a mixture of rotamers):  $\delta$  197.1, 196.5, 173.6, 173.2, 58.8, 58.0, 46.9, 34.1, 33.5, 32.8, 31.3, 30.7, 30.34, 30.30, 30.25, 30.2, 29.4, 29.2, 29.1, 26.5, 25.8, 24.6, 22.1.

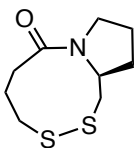

### 7c

A solution of **6c** (42.6 mg, 0.14 mmol) in anhydrous MeOH (140 mL) was bubbled with N<sub>2</sub> for 30 min, and 28% sodium methoxide (NaOMe) in MeOH (120  $\mu$ L, 0.62 mmol) was added to the solution. The reaction mixture was stirred at rt under N<sub>2</sub> flow for 35 min. A solution of I<sub>2</sub> (128.8 mg, 1.01 mmol) in Et<sub>2</sub>O (5 mL) was added to the reaction mixture dropwise until the color became pale. The reaction mixture was stirred at rt under N<sub>2</sub> flow for 2 h. Aqueous 10% Na<sub>2</sub>S<sub>2</sub>O<sub>3</sub> (10 mL) was added to the solution and the mixture was evaporated to remove MeOH solvent. The solution was extracted with AcOEt (50 mL  $\times$  3), and the organic layer was washed with washed with saturated aqueous solution of NH<sub>4</sub>Cl (30 mL), dried over Na<sub>2</sub>SO<sub>4</sub> and evaporated to give a crude, which was purified by column-chromatography (eluent: n-hexane: EtOH= 3:1) to give **7c** as a pale yellow oil (11.5 mg, 0.054 mmol, 39%).

<sup>1</sup>H NMR (400 MHz, MeOD) (a mixture of rotamers):  $\delta$  4.59-4.38 (1H, m), 3.81-3.65 (1H, m), 3.25-2.65 (5H, m), 2.55-1.68 (6H, m).

<sup>13</sup>C{<sup>1</sup>H} NMR (100 MHz, MeOD) (a mixture of rotamers):  $\delta$  174.1, 58.2, 44.6, 42.8, 35.5, 31.8, 31.4, 27.2, 22.7.

HRMS(ESI<sup>+</sup>, *m/z*) Calcd. for C<sub>9</sub>H<sub>16</sub>NOS<sub>2</sub><sup>+</sup> ([M+H]<sup>+</sup>) 218.0668. Found: 218.0637.

HPLC (210 nm, CH<sub>3</sub>CN: H<sub>2</sub>O= 8:2): t<sub>R</sub> 8.63 min, 88%.

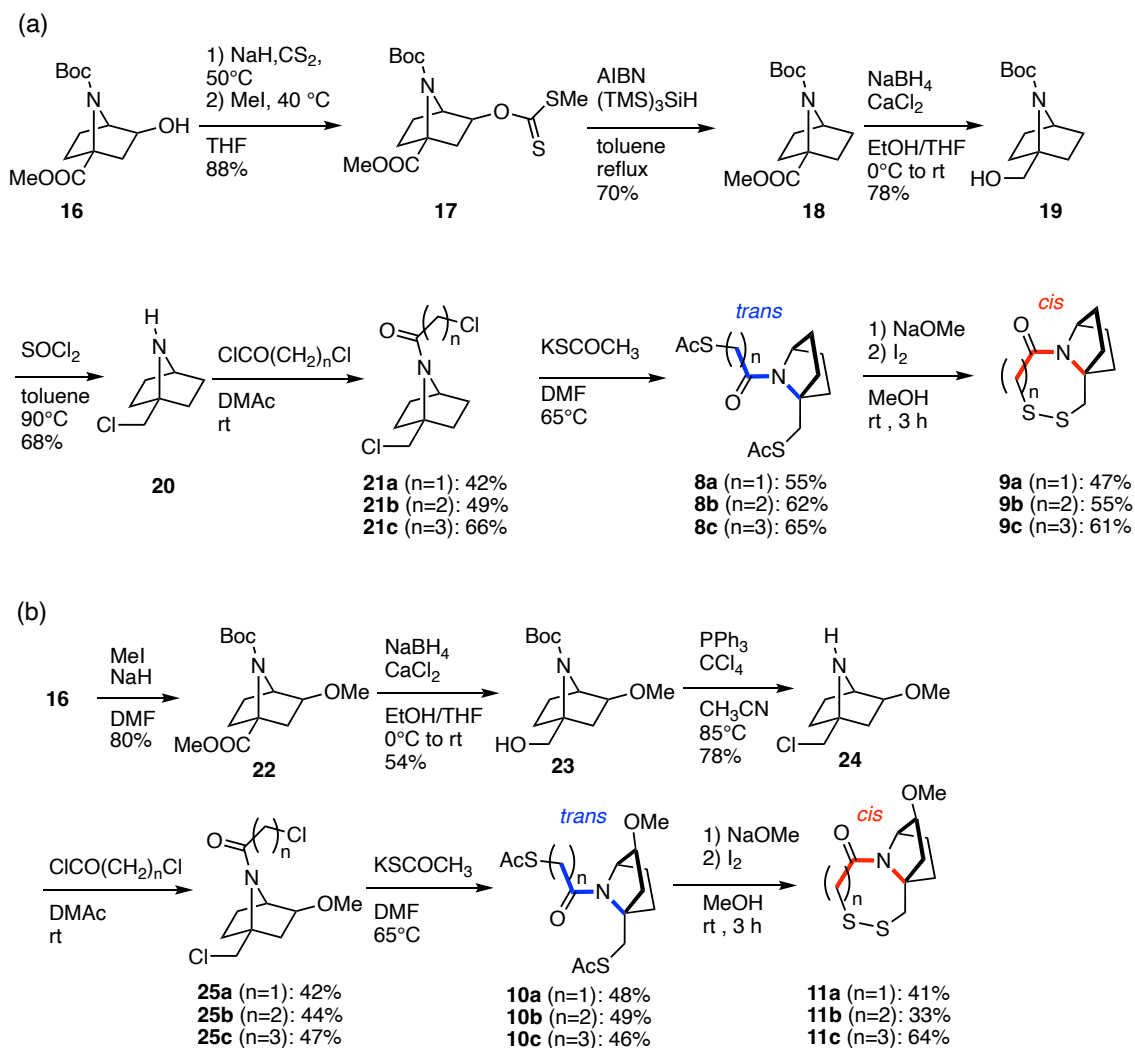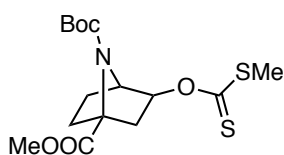

## 17

To a solution of **16** (2.26 g, 8.34 mmol) and 60% sodium hydride (NaH) (1.42 g, 35.5 mmol) in anhydrous THF (60 mL) was added carbon disulfide (CS<sub>2</sub>) (15 mL, 233.9 mmol) at 0°C. The reaction mixture was stirred at 30°C for 2 h. Iodomethane (MeI) (5.2 mL, 83.53 mmol) was added and the mixture was stirred at 40°C for 2 h. The reaction mixture was poured into ice-water and saturated aqueous solution of NH<sub>4</sub>Cl (20 mL), and the mixture was extracted with AcOEt (50 mL × 3). The organic layer was washed with saturated aqueous solution of NaHCO<sub>3</sub> (80 mL × 2) and saturated aqueous solution of

NH<sub>4</sub>Cl (80 mL × 2), dried over Na<sub>2</sub>SO<sub>4</sub> and evaporated. The crude was purified by column-chromatography (eluent: n-hexane: AcOEt= 5:1) to give **17** (2.53 g, 7.0 mmol, 84%) as a colorless oil.

<sup>1</sup>H NMR (400 MHz, CDCl<sub>3</sub>): δ 5.27 (1H, dd, J= 4.8, 4.4 Hz), 4.42 (1H, d, J=6.4 Hz), 3.63 (3H, s), 2.39 (3H, s), 2.16 (2H, d, J =6.4 Hz), 2.00-1.91 (1H, m), 1.84-1.76 (1H, m), 1.53-1.49 (2H, m), 1.26 (9H, s), 1.16-1.06 (1H, m).

<sup>13</sup>C{<sup>1</sup>H} NMR (100 MHz, CDCl<sub>3</sub>): δ 214.8, 169.6, 155.1, 84.7, 80.6, 67.32, 62.6, 59.9, 51.9, 41.1, 32.4, 31.2, 27.7, 23.5, 20.6, 18.9.

HRMS (ESI<sup>+</sup>, *m/z*): Calcd. for C<sub>15</sub>H<sub>23</sub>S<sub>2</sub>NNaO<sub>5</sub><sup>+</sup> ([M+Na]<sup>+</sup>): 384.0910. Found: 384.0904.

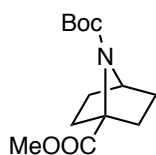

## 18

To a solution of **17** (2.53 g, 7.0 mmol) and tris(trimethylsilyl)silane ((TMS)<sub>3</sub>SiH) (3.2 mL, 10.5 mmol) in anhydrous toluene (30 mL) was added AIBN (114.9 mg, 0.7 mmol) at 75°C. The reaction mixture was stirred at 90°C for 30 min and quenched by evaporation of the solvent under reduced pressure. The crude was purified by column-chromatography (eluent: n-hexane: AcOEt= 7:1) to give **18** (1.47 g, 5.75 mmol, 82%) as a colorless oil.

<sup>1</sup>H NMR (400 MHz, CDCl<sub>3</sub>): δ 4.18 (1H, m), 3.66 (3H, s), 2.07-2.01 (2H, m), 1.82-1.77 (2H, m), 1.65-1.59 (2H, m), 1.41-1.36 (2H, m), 1.29 (9H, s).

<sup>13</sup>C{<sup>1</sup>H} NMR (100 MHz, CDCl<sub>3</sub>): δ 171.5, 156.3, 80.4, 68.5, 59.5, 51.9, 33.2, 29.1, 27.8.

HRMS (ESI<sup>+</sup>, *m/z*): Calcd. for C<sub>13</sub>H<sub>21</sub>NNaO<sub>4</sub><sup>+</sup> ([M+Na]<sup>+</sup>): 278.1363. Found: 278.1346.

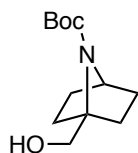

## 19

To a solution of **18** (1.26 g, 4.93 mmol) in EtOH (18 mL) and THF (12 mL) were added CaCl<sub>2</sub> (1.09 g, 9.86 mmol) and NaBH<sub>4</sub> (746.0 mg, 19.72 mmol) at 0°C. The reaction mixture was stirred at rt for 2 h. A 5% solution of KHSO<sub>4</sub> (10 mL) was added at 0°C and the mixture was filtered through Celite and the solid was washed with AcOEt (40 mL ×

3) and with water (50 mL). The whole was extracted with AcOEt (50 mL × 3). The combined organic layer was washed with brine (80 mL), dried over Na<sub>2</sub>SO<sub>4</sub> and evaporated to give a crude mixture, which was purified by column-chromatography (eluent: n-hexane: AcOEt = 3: 2) to give **19** (814.9 mg, 3.59 mmol, 73%) as a colorless oil.

<sup>1</sup>H NMR (400 MHz, CDCl<sub>3</sub>): δ 4.91 (1H, brs) 4.23 (1H, t, J= 6.4 Hz), 3.89 (2H, d, J=7.2 Hz), 1.88-1.73 (4H, m), 1.43-1.34 (13H, m).

<sup>13</sup>C{<sup>1</sup>H} NMR (100 MHz, CDCl<sub>3</sub>): δ 155.2, 80.2, 69.2, 62.1, 58.4, 31.9, 29.3, 28.5.

HRMS (ESI<sup>+</sup>, *m/z*): Calcd. for C<sub>12</sub>H<sub>21</sub>NNaO<sub>3</sub><sup>+</sup> ([M+Na]<sup>+</sup>): 250.1414. Found: 250.1394

HPLC (210 nm, CH<sub>3</sub>CN: H<sub>2</sub>O= 9:1): t<sub>R</sub> 10.65 min, 96%.

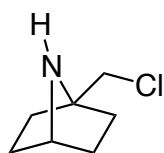

## 20

To a solution of **19** (814.9 mg, 3.59 mmol) in toluene (35 mL) was added SOCl<sub>2</sub> (2.5 mL, 34.7 mmol). The reaction mixture was stirred at 85°C for 8 h. The solution was evaporated to give a crude mixture, which was purified by column-chromatography (eluent: from CHCl<sub>3</sub>: Acetone= 9:1 to CHCl<sub>3</sub>: MeOH= 19:1) to give **20** (28.6 mg, 0.16 mmol, 78%) as a colorless oil. The reaction mixture was stirred at rt. under Ar atmosphere for 5 h and quenched by evaporation of the solvent under reduced pressure. Compound **20** was obtained as pale-yellow liquid, which was used in the next step without further purification.

HRMS (ESI<sup>+</sup>, *m/z*): Calcd. for C<sub>7</sub>H<sub>13</sub>NCl<sup>+</sup> ([M+H]<sup>+</sup>): 146.0731. Found: 146.0748.

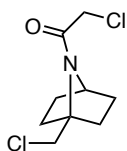

## 21a

To a solution of **20** (162.5 mg, 0.92 mmol) in anhydrous CH<sub>2</sub>Cl<sub>2</sub> (30 mL) were added chloroacetyl chloride (150 μL, 1.56 mmol) and Et<sub>3</sub>N (300 μL, 2.16 mmol) at 0°C. The reaction mixture was stirred at 0°C for 20min and rt for 18 h, saturated aqueous solution



of  $\text{NH}_4\text{Cl}$  (20 mL) was added to quench the reaction, which was extracted with  $\text{AcOEt}$  (50 mL  $\times$  3). The organic layer was washed with saturated aqueous solution of  $\text{NaHCO}_3$  (20 mL  $\times$  2) and saturated aqueous solution of  $\text{NH}_4\text{Cl}$  (20 mL  $\times$  2), dried over  $\text{Na}_2\text{SO}_4$  and evaporated. The crude was purified by column-chromatography (eluent: n-hexane:  $\text{AcOEt}$ = 1:1) to give **21a** (131.6 mg, 0.52 mmol, 57%) as a colorless oil.

$^1\text{H}$  NMR (400 MHz,  $\text{CDCl}_3$ ) (a mixture of rotamers):  $\delta$  4.34 (2H, s), 4.30 (1H, t,  $J$ = 4.8 Hz), 4.95 (2H, s), 1.92-1.84 (6H, m), 1.60-1.55 (2H, m).

$^{13}\text{C}\{^1\text{H}\}$  NMR (100 MHz,  $\text{CDCl}_3$ ):  $\delta$  163.8, 69.2, 59.4, 47.2, 42.9, 33.7, 29.6.

HRMS (ESI<sup>+</sup>,  $m/z$ ): Calcd. for  $\text{C}_9\text{H}_{13}\text{Cl}_2\text{NONa}^+$  ( $[\text{M}+\text{Na}]^+$ ): 244.0266. Found: 244.0515.

HPLC (210 nm,  $\text{CH}_3\text{CN}$ :  $\text{H}_2\text{O}$ = 9:1):  $t_{\text{R}}$  8.20 min, 99%.

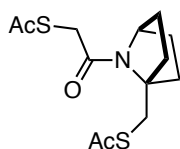

### 8a

To a solution of **21a** (131.6 mg, 0.52 mmol) in DMF (20 mL) was added potassium thioacetate (788 mg, 6.9 mmol). The reaction mixture was stirred at 65°C under Ar atmosphere for 24 h.  $\text{AcOEt}$  (100 mL) was added to the mixture and the whole was washed with water (80 mL  $\times$  5) and brine (40 mL). The combined organic layer was dried over  $\text{Na}_2\text{SO}_4$  and evaporated to give a crude mixture, which was purified by column-chromatography (eluent: n-hexane:  $\text{AcOEt}$ = 3:2) to give **8a** (86.4 mg, 0.29 mmol, 55%) as a deep brown oil.

$^1\text{H}$  NMR (400 MHz,  $\text{CDCl}_3$ ):  $\delta$  4.30 (1H, t  $J$ =7.2 Hz), 3.74 (2H, d,  $J$ =4.4 Hz), 2.38 (3H, s), 2.33 (3H, s), 1.87-1.53 (8H, m).

$^{13}\text{C}\{^1\text{H}\}$  NMR (100 MHz,  $\text{CDCl}_3$ ):  $\delta$  196.9, 194.6, 165.0, 68.5, 58.6, 33.9, 33.4, 32.2, 30.19, 30.15, 29.8.

HRMS (ESI<sup>+</sup>,  $m/z$ ): Calcd. for  $\text{C}_{13}\text{H}_{19}\text{NaNO}_3\text{S}_2^+$  ( $[\text{M}+\text{Na}]^+$ ): 324.0699. Found: 324.0715.

HPLC (210 nm,  $\text{CH}_3\text{CN}$ :  $\text{H}_2\text{O}$ = 9:1):  $t_{\text{R}}$  7.92 min, 100%.

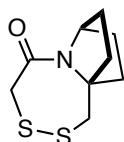

### 9a

A solution of **8a** (86.4 mg, 0.29 mmol) in anhydrous MeOH (60 mL) was bubbled with

N<sub>2</sub> for 1h, and 28% sodium methoxide (NaOMe) in MeOH (200 μL, 1.03 mmol) was added. The reaction mixture was stirred at rt under N<sub>2</sub> flow for 35 min. A solution of I<sub>2</sub> (102.9 mg, 0.81 mmol) in Et<sub>2</sub>O (9 mL) was added to the reaction mixture dropwise until the color became pale. The reaction mixture was stirred at rt under N<sub>2</sub> flow for 2 h. Aqueous 10% Na<sub>2</sub>S<sub>2</sub>O<sub>3</sub> (10 mL) was added to the solution and the mixture was evaporated to remove MeOH solvent. The solution was extracted with AcOEt (50 mL × 3), and the organic layer was washed with washed with saturated aqueous solution of NH<sub>4</sub>Cl (30 mL), dried over Na<sub>2</sub>SO<sub>4</sub> and evaporated to give a crude, which was purified by column-chromatography (eluent: n-hexane: EtOH= 3:1) to give **9a** as a pale-yellow oil (29.3 mg, 0.14 mmol, 47%).

<sup>1</sup>H NMR (400 MHz, CD<sub>2</sub>Cl<sub>2</sub>): δ 4.79 (1H, t, J= 4.8 Hz), 3.75 (2H, s), 3.52 (2H, s), 2.06-1.50 (8H, m).

<sup>13</sup>C{<sup>1</sup>H} NMR (100 MHz, CD<sub>2</sub>Cl<sub>2</sub>): δ 172.6, 69.4, 59.8, 45.7, 44.6, 37.3, 28.5.

HRMS (ESI<sup>+</sup>, *m/z*): Calcd. for C<sub>9</sub>H<sub>14</sub>NOS<sub>2</sub><sup>+</sup> ([M+H]<sup>+</sup>): 216.0511. Found: 216.0499.

HPLC (210 nm, CH<sub>3</sub>CN: H<sub>2</sub>O= 9:1): t<sub>R</sub> 8.77 min, 97%.

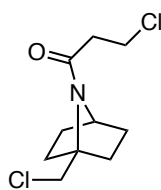

### **21b**

To a solution of **20** (3.21 mmol) in anhydrous CH<sub>2</sub>Cl<sub>2</sub> (30 mL) were added 3-chloropropionyl chloride (0.5 mL, 5 mmol) and Et<sub>3</sub>N (0.6 mL, 4.32 mmol) at 0°C. The reaction mixture was stirred at 0°C for 20 min and rt for 18 h, saturated aqueous solution of NH<sub>4</sub>Cl (20 mL) was added to quench the reaction, which was extracted with AcOEt (50 mL × 3). The organic layer was washed with saturated aqueous solution of NaHCO<sub>3</sub> (50 mL × 2) and saturated aqueous solution of NH<sub>4</sub>Cl (50 mL × 2), dried over Na<sub>2</sub>SO<sub>4</sub> and evaporated. The crude was purified by column-chromatography (eluent: n-hexane: AcOEt= 1:1) to give **21b** (377.3 mg, 1.6 mmol, 49%) as a colorless oil.

<sup>1</sup>H NMR (400 MHz, CDCl<sub>3</sub>): δ 4.39 (2H, s), 4.25(1H, s), 3.79-3.76 (2H, m), 1.85-1.55 (8H, m).

<sup>13</sup>C{<sup>1</sup>H} NMR (100 MHz, CDCl<sub>3</sub>): δ 167.9, 68.7, 58.9, 47.6, 39.8, 38.0, 33.8, 29.7.

HRMS (ESI<sup>+</sup>, *m/z*): Calcd. for C<sub>10</sub>H<sub>16</sub>Cl<sub>2</sub>NO<sup>+</sup> ([M+H]<sup>+</sup>): 236.0603. Found: 236.0605.

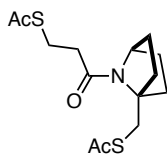

### 8b

To a solution of **21b** (377.3 mg, 1.6 mmol) in DMF (20 mL) was added potassium thioacetate (78.8 mg, 0.69 mmol). The reaction mixture was stirred at 65°C under Ar atmosphere for 24 h. AcOEt (100 mL) was added to the mixture and the whole was washed with water (80 mL × 5) and brine (40 mL). The combined organic layer was dried over Na<sub>2</sub>SO<sub>4</sub> and evaporated to give a crude mixture, which was purified by column-chromatography (eluent: n-hexane: AcOEt= 3:2) to give **8b** (312.7 mg, 0.99 mmol, 62%) as a deep brown oil.

<sup>1</sup>H NMR (400 MHz, CDCl<sub>3</sub>): δ 4.17 (1H, s), 3.76 (2H, s), 3.10 (2H, t, J=7.2Hz), 2.58 (H, t, J=7.2Hz), 2.34 (3H, s), 2.33 (3H, s), 1.81-1.53 (8H, m).

<sup>13</sup>C{<sup>1</sup>H} NMR (100 MHz, CDCl<sub>3</sub>): δ 196.9, 196.5, 168.9, 67.9, 57.9, 35.3, 34.2, 32.5, 30.7, 30.4, 29.9, 24.6.

HRMS (ESI<sup>+</sup>, *m/z*): Calcd. for C<sub>14</sub>H<sub>21</sub>NaNO<sub>3</sub>S<sub>2</sub><sup>+</sup> ([M+Na]<sup>+</sup>): 338.0855. Found: 338.0854.

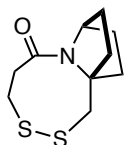

### 9b

To a solution of **8b** (97.1 mg, 0.31 mmol) in anhydrous MeOH (150 mL), dissolved for 1 h under N<sub>2</sub> flow, 28% sodium methoxide (NaOMe) in MeOH (200 μL, 1.03 mmol) was added. The reaction mixture was stirred at rt under N<sub>2</sub> flow for 35 min. A solution of I<sub>2</sub> (358.1 mg, 2.82 mmol) in Et<sub>2</sub>O (9 mL) was added to the reaction mixture dropwise until the color became pale. The reaction mixture was stirred at rt under N<sub>2</sub> flow for 2 h. T Aqueous 10% Na<sub>2</sub>S<sub>2</sub>O<sub>3</sub> (20 mL) was added to the solution and the mixture was evaporated to remove MeOH solvent. The solution was extracted with AcOEt (50 mL × 3), and the organic layer was washed with washed with saturated aqueous solution of NH<sub>4</sub>Cl (30 mL), dried over Na<sub>2</sub>SO<sub>4</sub> and evaporated to give a crude, which was purified by column-chromatography (eluent: n-hexane: EtOH= 3:1) to give **9b** as a pale yellow oil (39.0 mg, 0.17 mmol, 55%).

<sup>1</sup>H NMR (400 MHz, MeOD): δ 4.792 (1H, t, 6.4 Hz), 3.897 (1H, d, J=2.4 Hz), 3.258-3.208 (2H, m), 3.057 (1H, ddd, J=5.2, 13.2, 13.2 Hz), 2.847 (1H, ddd, J=4.4, 13.2, 13.2

Hz), 2.633-2.584 (2H, m), 1.837-1.525 (7H, m).

$^{13}\text{C}\{^1\text{H}\}$  NMR (100 MHz,  $\text{CDCl}_3$ ):  $\delta$  166.03, 67.19, 54.81, 41.11, 37.13, 37.09, 35.51, 32.66, 28.33, 26.75.

HRMS (ESI<sup>+</sup>,  $m/z$ ): Calcd. for  $\text{C}_{10}\text{H}_{15}\text{NONaS}_2^+$  ( $[\text{M}+\text{Na}]^+$ ): 252.0487. Found: 252.0478.

HPLC (210 nm,  $\text{CH}_3\text{CN}$ :  $\text{H}_2\text{O}$ = 7:3):  $t_{\text{R}}$  9.72 min, 89%.

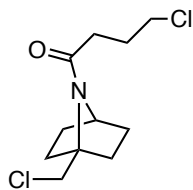

### 21c

To a solution of **20** (3.21 mmol) in anhydrous  $\text{CH}_2\text{Cl}_2$  (30 mL) were added 4-chloropropionyl chloride (0.5 mL, 5 mmol) and  $\text{Et}_3\text{N}$  (0.6 mL, 4.32 mmol) at  $0^\circ\text{C}$ . The reaction mixture was stirred at  $0^\circ\text{C}$  for 20 min and rt for 18 h, saturated aqueous solution of  $\text{NH}_4\text{Cl}$  (20 mL) was added to quench the reaction, which was extracted with  $\text{AcOEt}$  (50 mL  $\times$  3). The organic layer was washed with saturated aqueous solution of  $\text{NaHCO}_3$  (50 mL  $\times$  2) and saturated aqueous solution of  $\text{NH}_4\text{Cl}$  (50 mL  $\times$  2), dried over  $\text{Na}_2\text{SO}_4$  and evaporated. The crude was purified by column-chromatography (eluent: n-hexane:  $\text{AcOEt}$ = 1:1) to give **21c** (438.2 mg, 1.6 mmol, 55%) as a colorless oil.

$^1\text{H}$  NMR (400 MHz,  $\text{CDCl}_3$ ):  $\delta$  4.36 (2H, s), 4.26 (1H, s), 3.58 (2H, t,  $J$ = 6.4 Hz), 2.43 (2H, t,  $J$ = 7.2 Hz), 2.06-2.03 (2H, m), 1.81-1.51 (10H, m).

$^{13}\text{C}\{^1\text{H}\}$  NMR (100 MHz,  $\text{CDCl}_3$ ):  $\delta$  170.2, 68.4, 58.7, 47.8, 44.8, 33.8, 31.6, 29.57, 27.6.

HRMS (ESI<sup>+</sup>,  $m/z$ ): Calcd. for  $\text{C}_{11}\text{H}_{18}\text{Cl}_2\text{NO}^+$  ( $[\text{M}+\text{H}]^+$ ): 250.0760. Found: 250.0760.

HPLC (210 nm,  $\text{CH}_3\text{CN}$ :  $\text{H}_2\text{O}$ =9:1):  $t_{\text{R}}$  9.06 min, 91%.

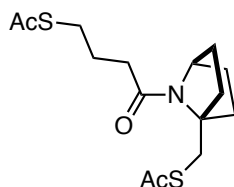

### 8c

To a solution of **21c** (220.6 mg, 0.8 mmol) in DMF (20 mL) was added potassium thioacetate (78.8 mg, 0.69 mmol). The reaction mixture was stirred at  $65^\circ\text{C}$  under Ar atmosphere for 24 h.  $\text{AcOEt}$  (100 mL) was added to the mixture and the whole was washed with water (80 mL  $\times$  5) and brine (40 mL). The combined organic layer was dried over  $\text{Na}_2\text{SO}_4$  and evaporated to give a crude mixture, which was purified by column-

chromatography (eluent: n-hexane: AcOEt=3:2) to give **8c** (157.9 mg, 0.48 mmol, 62%) as a deep brown oil.

$^1\text{H}$  NMR (400 MHz,  $\text{CDCl}_3$ ):  $\delta$  4.16 (1H, s), 3.75 (2H, s), 2.92 (2H, t,  $J=7.2$  Hz), 2.33 (3H, s), 2.32 (3H, s), 1.89 (2H, t,  $J=7.2$  Hz), 1.79-1.53 (8H, m).

$^{13}\text{C}\{^1\text{H}\}$  NMR (100M Hz,  $\text{CDCl}_3$ ):  $\delta$  196.9, 195.8, 170.1, 67.6, 57.8, 34.1, 33.7, 32.5, 30.6, 30.2, 29.8, 28.6, 24.9.

HRMS (ESI<sup>+</sup>,  $m/z$ ): Calcd. for  $\text{C}_{15}\text{H}_{23}\text{NNaO}_3\text{S}_2^+$  ( $[\text{M}+\text{Na}]^+$ ): 352.1012. Found: 352.1006.

HPLC (210 nm,  $\text{CH}_3\text{CN}$ :  $\text{H}_2\text{O}$ = 7:3):  $t_{\text{R}}$  9.58 min, 97%.

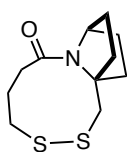

### 9c

A solution of **8c** (157.9 mg, 0.48 mmol) in anhydrous MeOH (160 mL) was bubbled with  $\text{N}_2$  for 1 h, and 28% sodium methoxide (NaOMe) in MeOH (400  $\mu\text{L}$ , 2.06 mmol) was added to the solution. The reaction mixture was stirred at rt under  $\text{N}_2$  flow for 35 min. A solution of  $\text{I}_2$  (700.2 mg, 5.52 mmol) in  $\text{Et}_2\text{O}$  (9 mL) was added to the reaction mixture dropwise until the color became pale. The reaction mixture was stirred at rt under  $\text{N}_2$  flow for 2 h. Aqueous 10%  $\text{Na}_2\text{S}_2\text{O}_3$  (20 mL) was added to the solution and the mixture was evaporated to remove MeOH solvent. The solution was extracted with AcOEt (50 mL  $\times$  3), and the organic layer was washed with washed with saturated aqueous solution of  $\text{NH}_4\text{Cl}$  (30 mL), dried over  $\text{Na}_2\text{SO}_4$  and evaporated to give a crude, which was purified by column-chromatography (eluent: n-hexane: EtOH= 3:1) to give **9c** as white solid (71.2 mg, 0.29 mmol, 60%).

$^1\text{H}$  NMR (400 MHz,  $\text{CDCl}_3$ ):  $\delta$  4.87 (1H, t, 5.2 Hz), 3.63-3.43 (2H, m), 3.21-2.74 (3H, m), 2.36-2.23 (3H, m), 1.94-1.52 (8H, m).

$^{13}\text{C}\{^1\text{H}\}$  NMR (100 MHz,  $\text{CD}_2\text{Cl}_2$ ):  $\delta$  172.0, 69.0, 57.3, 47.0, 41.6, 38.3, 36.8, 32.3, 29.5, 27.5, 26.4.

HRMS (ESI<sup>+</sup>,  $m/z$ ): Calcd. for  $\text{C}_{11}\text{H}_{17}\text{NOS}_2\text{Na}^+$  ( $[\text{M}+\text{Na}]^+$ ): 266.0644. Found: 266.0652.

HPLC (210 nm,  $\text{CH}_3\text{CN}$ :  $\text{H}_2\text{O}$ = 7:3):  $t_{\text{R}}$  8.56 min, 98%.

Mp: 87-89.5°C.

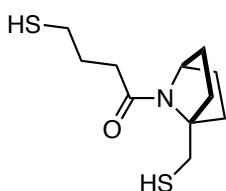

### 8d

To a solution of **9c** (4.6 mg, 0.02 mmol) in anhydrous MeOH (0.75 mL) was added tris(2-carboxyethyl)phosphine (TCEP) (36.0 mg, 0.1 mmol) at 0°C. 2M NaHCO<sub>3</sub> (0.06 mL) was added to the mixture and the reaction mixture was stirred under Ar atmosphere at rt for 5 h. The reaction mixture was evaporated. The residue was washed with CHCl<sub>3</sub> and the solution was evaporated to give **8d** (3.5 mg, 0.014 mmol, 72%) as a colorless oil.

<sup>1</sup>H NMR (400 MHz, CDCl<sub>3</sub>): δ 4.21(1H, t, J= 4.8 Hz), 3.27 (2H, s), 2.57 (2H, t, J= 6.8 Hz, J=1.2 Hz), 2.41 (2H, t, J=7.2 Hz), 1.99-1.86 (4H, m), 1.83-1.76 (2H, m), 1.59-1.51 (5H, m).

<sup>13</sup>C{<sup>1</sup>H} NMR (100 MHz, MeOD): δ 170.7, 69.5, 58.2, 33.9, 33.5, 29.9, 29.1, 29.0, 28.9, 24.3, 24.2.

HRMS (ESI<sup>+</sup>, *m/z*): Calcd. for C<sub>11</sub>H<sub>19</sub>NNaOS<sub>2</sub><sup>+</sup> ([M+Na]<sup>+</sup>): 268.0800. Found: 268.0817.

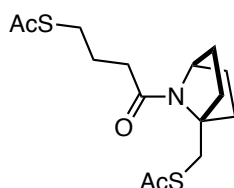

### 8c (synthesized from 8d)

To a solution of **8d** (3.5 mg, 0.014 mmol) in pyridine (1 mL), Ac<sub>2</sub>O (7 mg, 0.06 mmol) was added. The reaction mixture was stirred at 0°C for 1 h and then at rt for 16 h under Ar atmosphere. AcOEt (30 mL) was added to the mixture and the whole was washed with water (30 mL), saturated aqueous solution of NH<sub>4</sub>Cl (30 mL), saturated aqueous solution of NaHCO<sub>3</sub> (30 mL) and brine (20 mL). The combined organic layer was dried over Na<sub>2</sub>SO<sub>4</sub> and the solvent was evaporated to give a crude mixture, which was purified by column-chromatography (eluent: n-hexane: AcOEt= 2:1) to give **8c** (2.3 mg, 49%) as a colorless oil.

<sup>1</sup>H-NMR (400 MHz, CDCl<sub>3</sub>): δ 4.14(1H, s), 3.74(2H, s), 2.91(2H, t, J=7.2 Hz), 2.318 (3H, s), 2.17 (3H, s), 1.88 (2H, t, J=7.8 Hz), 1.77-1.76 (4H, m), 1.56-1.52 (6H, m).

<sup>1</sup>H NMR (400 MHz, CDCl<sub>3</sub>): δ 4.16 (1H, s), 3.75 (2H, s), 2.92 (1H t, J=7.2 Hz), 2.33-2.32 (8H, m), 1.91-1.53 (10H, m).

HRMS (ESI<sup>+</sup>, *m/z*): Calcd. for C<sub>15</sub>H<sub>23</sub>NNaO<sub>3</sub>S<sub>2</sub><sup>+</sup> ([M+Na]<sup>+</sup>): 352.1012. Found: 352.1006.

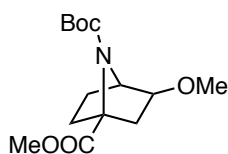

## 22

To a solution of **16** (896.6 mg, 3.3 mmol) and NaH (400.2 mg, 9.9 mmol) in anhydrous DMF (30 mL) was added MeI (1.32 mL) at 0°C. The reaction mixture was stirred at 0°C for 20 min and rt for 18 h, saturated aqueous solution of NH<sub>4</sub>Cl (20 mL) was added to quench the reaction, which was extracted with AcOEt (50 mL × 3). The organic layer was washed with saturated aqueous solution of NaHCO<sub>3</sub> (20 mL × 2) and saturated aqueous solution of NH<sub>4</sub>Cl (20 mL × 2) then combined, dried over Na<sub>2</sub>SO<sub>4</sub> and evaporated. The crude was purified by column-chromatography (eluent: n-hexane: AcOEt= 1:1) to give **22** (758.0 mg, 2.66 mmol, 82%) as a colorless oil.

<sup>1</sup>H NMR (400 MHz, CDCl<sub>3</sub>): δ 4.41 (1H, d, J=5.2 Hz), 3.80 (3H, s), 3.55-3.53 (1H, m), 3.30 (3H, s), 2.09-1.89 (4H, m), 1.59-1.58 (1H, m), 1.42 (9H, s), 1.32-1.24 (1H, m).

<sup>13</sup>C{<sup>1</sup>H} NMR (100MHz, CDCl<sub>3</sub>): δ 171.0, 156.5, 83.4, 80.6, 67.5, 61.4, 60.3, 56.1, 52.1, 33.0, 28.0, 23.8, 21.0, 14.2.

HRMS (ESI<sup>+</sup>, *m/z*): Calcd. for C<sub>14</sub>H<sub>23</sub>NNaO<sub>5</sub><sup>+</sup> ([M+Na]<sup>+</sup>): 308.1468. Found: 308.1486.

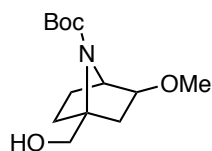

## 23

To a solution of **22** (1.4026 g, 4.91 mmol) in EtOH (30 mL) and THF (20 mL) were added CaCl<sub>2</sub> (1.2214 g, 11.2 mmol) and NaBH<sub>4</sub> (982.6 mg, 25.8 mmol) at 0°C. The reaction mixture was stirred at rt for 4 h. A 5% solution of KHSO<sub>4</sub> (10 mL) was added at 0°C and the mixture was filtered through Celite and the solid was washed with AcOEt (40 mL × 3) and with water (10 mL). The whole was extracted with AcOEt (50 mL × 3). The combined organic layer was washed with brine (10 mL), dried over Na<sub>2</sub>SO<sub>4</sub> and the solvent was evaporated to give a crude mixture, which was purified by column-chromatography (eluent: n-hexane: AcOEt= 1:1) to give **23** (834.6 mg, 3.25 mmol, 66%) as a colorless oil.

<sup>1</sup>H NMR (400 MHz, CDCl<sub>3</sub>): δ 5.08(1H, s), 4.34 (1H, d, J=5.6 Hz), 3.97-3.81 (2H, m), 3.51 (1H, dd, J=6.8, 2.4 Hz), 3.29 (3H, d, J=0.4 Hz), 1.83-1.66 (4H, m), 1.44 (9H, s),

1.28-1.20 (6H, m).

$^{13}\text{C}\{^1\text{H}\}$  NMR (100MHz,  $\text{CDCl}_3$ ):  $\delta$  156.1, 83.2, 80.3, 68.5, 61.5, 60.2, 56.1, 40.0, 31.7, 28.3, 23.7.

HRMS (ESI<sup>+</sup>,  $m/z$ ): Calcd. for  $\text{C}_{13}\text{H}_{23}\text{NNaO}_4^+$  ( $[\text{M}+\text{Na}]^+$ ): 280.1519. Found: 280.1526.

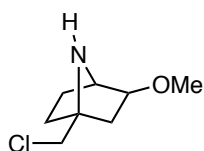

## 24

To a solution of **23** (53.6 mg, 0.21 mmol) in  $\text{CH}_3\text{CN}$  (10 mL) was added triphenylphosphine ( $\text{PPh}_3$ ) (162.4 mg, 0.62 mmol) and carbon tetrachloride ( $\text{CCl}_4$ ) (150  $\mu\text{L}$ ). The reaction mixture was stirred at  $85^\circ\text{C}$  for 18 h. The solution was evaporated to give a crude mixture, which was purified by column-chromatography (eluent: from  $\text{CHCl}_3$ : Acetone= 9:1 to  $\text{CHCl}_3$ : MeOH=19:1) to give **24** (28.6 mg, 0.16 mmol, 78%) as a colorless oil.

$^1\text{H}$  NMR (400 MHz,  $\text{CDCl}_3$ ):  $\delta$  3.85 (1H, d,  $J=11.6$  Hz), 3.79 (1H, d,  $J=11.2$  Hz), 3.58 (1H, dd,  $J=10.8, 6.0$  Hz), 3.28 (3H, s), 2.12 (1H, s), 1.84-1.78 (1H, m), 1.53-1.24 (4H, m).

HRMS (ESI<sup>+</sup>,  $m/z$ ): Calcd. for  $\text{C}_8\text{H}_{15}\text{ClNO}_4^+$  ( $[\text{M}+\text{H}]^+$ ): 176.0837. Found: 176.0833.

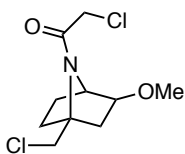

## 25a

To a solution of **24** (162.5 mg, 0.92 mmol) in anhydrous  $\text{CH}_2\text{Cl}_2$  (30 mL) were added chloroacetyl chloride (150  $\mu\text{L}$ , 1.56 mmol) and  $\text{Et}_3\text{N}$  (300  $\mu\text{L}$ , 2.16 mmol) at  $0^\circ\text{C}$ . The reaction mixture was stirred at  $0^\circ\text{C}$  for 20 min and rt for 18 h, saturated aqueous solution of  $\text{NH}_4\text{Cl}$  (20 mL) was added to quench the reaction, which was extracted with AcOEt (50mL  $\times$  3). The organic layer was washed with saturated aqueous solution of  $\text{NaHCO}_3$  (20 mL  $\times$  2) and saturated aqueous solution of  $\text{NH}_4\text{Cl}$  (20 mL  $\times$  2) then combined, dried over  $\text{Na}_2\text{SO}_4$  and evaporated. The crude was purified by column-chromatography (eluent: n-hexane: AcOEt= 1:1) to give **25a** (131.6 mg, 0.52 mmol, 57%) as a colorless oil.

$^1\text{H}$  NMR (400 MHz,  $\text{CDCl}_3$ ):  $\delta$  4.38 (1H, d,  $J=11.4$  Hz), 4.32 (1H, d,  $J=11.4$  Hz), 4.25 (1H, d,  $J=5.6$  Hz), 4.07 (1H, d,  $J=13.0$  Hz), 3.95 (1H, d,  $J=13.0$  Hz), 3.54 (1H, dd,



$J=6.8, 2.0$  Hz), 3.23 (3H, s), 2.13-1.33 (6H, m).

$^{13}\text{C}\{^1\text{H}\}$  NMR (100 MHz,  $\text{CDCl}_3$ ):  $\delta$  166.1, 82.4, 68.7, 62.7, 55.9, 46.9, 43.1, 42.3, 32.9, 23.7.

HRMS (ESI<sup>+</sup>,  $m/z$ ): Calcd. for  $\text{C}_{12}\text{H}_{19}\text{ClNO}_4^+$  ( $[\text{M}+\text{H}]^+$ ): 252.0553. Found: 252.0561.

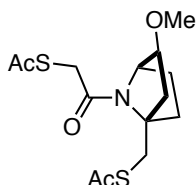

### 10a

To a solution of **25a** (131.6 mg, 0.52 mmol) in DMF (20 mL) was added potassium thioacetate (699.8 mg, 6.13 mmol). The reaction mixture was stirred at 65°C under Ar atmosphere for 24 h. Water was added to quench the reaction, which was extracted with AcOEt (50 mL). The organic layer was washed with saturated aqueous solution of  $\text{NaHCO}_3$  (20 mL) and saturated aqueous solution of  $\text{NH}_4\text{Cl}$  (20 mL  $\times$  2) then combined, dried over  $\text{Na}_2\text{SO}_4$  and evaporated to give a crude mixture, which was purified by column-chromatography (eluent: n-hexane: AcOEt= 3:2) to give **10a** (94.2 mg, 0.28 mmol, 49%) as a deep brown oil.

$^1\text{H}$ -NMR (400MHz, MeOD):  $\delta$  4.45 (1H, d,  $J=5.6$  Hz), 3.93 (1H, d,  $J=15.2$  Hz), 3.71 (1H, d,  $J=4$  Hz), 3.67 (1H, d,  $J=15.2$  Hz), 3.6 (1H, dd,  $J=6.8, 4.8$  Hz), 3.32 (3H, s), 2.37 (3H, s), 2.32 (3H, s), 2.02-1.22 (6H, m).

$^{13}\text{C}\{^1\text{H}\}$  NMR (100MHz, MeOD):  $\delta$  197.8, 195.9, 169.0, 83.8, 69.4, 63.1, 56.5, 44.1, 34.0, 33.8, 33.0, 30.1, 30.0, 24.5.

HRMS (ESI<sup>+</sup>,  $m/z$ ): Calcd. for  $\text{C}_{14}\text{H}_{21}\text{NNaO}_4\text{S}_2^+$  ( $[\text{M}+\text{Na}]^+$ ): 354.0804. Found: 354.0776

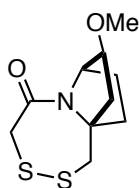

### 11a

A solution of **10a** (94.2 mg, 0.28 mmol) in anhydrous MeOH (150 mL) was bubbled with  $\text{N}_2$  for 1 h, and 28% sodium methoxide (NaOMe) in MeOH (200  $\mu\text{L}$ , 1.04 mmol) was added to the solution. The reaction mixture was stirred at rt under  $\text{N}_2$  flow for 35 min. A solution of  $\text{I}_2$  (280.6 mg, 2.21 mmol) in  $\text{Et}_2\text{O}$  (9 mL) was added to the reaction mixture dropwise until the color became pale. The reaction mixture was stirred at rt under  $\text{N}_2$  flow for 2 h. Aqueous 10%  $\text{Na}_2\text{S}_2\text{O}_3$  (20 mL) was added to the solution and the mixture was evaporated to remove MeOH solvent. The solution was extracted with AcOEt (50 mL  $\times$

3), and the organic layer was washed with washed with saturated aqueous solution of  $\text{NH}_4\text{Cl}$  (30 mL), dried over  $\text{Na}_2\text{SO}_4$  and evaporated to give a crude, which was purified by column-chromatography (eluent: n-hexane: EtOH=3:1) to give **11a** as a colorless oil (34.8 mg, 0.14 mmol, 50%).

$^1\text{H}$  NMR (400 MHz,  $\text{CD}_2\text{Cl}_2$ ):  $\delta$  4.91(1H, d,  $J=6.0$  Hz), 3.77(1H, d,  $J=3.2$  Hz), 3.58-3.43 (3H, m), 3.27 (3H, s), 1.97-1.84 (4H, m), 1.46-1.37 (2H, m).

$^{13}\text{C}\{^1\text{H}\}$  NMR (100 MHz,  $\text{CDCl}_3$ ):  $\delta$  172.0, 82.1, 68.5, 62.2, 56.5, 46.0, 45.4, 45.1, 36.1, 23.7.

HRMS (ESI<sup>+</sup>,  $m/z$ ): Calcd. for  $\text{C}_{10}\text{H}_{15}\text{S}_2\text{NNaO}_2^+$  ( $[\text{M}+\text{Na}]^+$ ): 268.0436. Found: 268.0426

HPLC (210 nm,  $\text{CH}_3\text{CN}$ :  $\text{H}_2\text{O}=7:3$ ):  $t_{\text{R}}$  8.76 min, 94%.

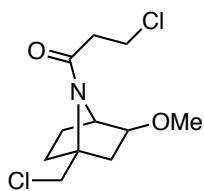

### **25b**

To a solution of **24** (120.6 mg, 0.69 mmol) in DMAc (30 mL) were added 3-chloropropionyl chloride (100  $\mu\text{L}$ , 1.04 mmol) and pyridine (150  $\mu\text{L}$ , 1.88 mmol) at  $0^\circ\text{C}$ . The reaction mixture was stirred at  $0^\circ\text{C}$  for 20 min and rt for 18 h, saturated aqueous solution of  $\text{NH}_4\text{Cl}$  (20 mL) was added to quench the reaction, which was extracted with AcOEt (50 mL). The organic layer was washed with saturated aqueous solution of  $\text{NaHCO}_3$  (20 mL) and saturated aqueous solution of  $\text{NH}_4\text{Cl}$  (20 mL), dried over  $\text{Na}_2\text{SO}_4$  and evaporated. The crude was purified by column-chromatography (eluent: n-hexane: AcOEt= 1:1) to give **25b** (131.6 mg, 0.52 mmol, 57%) as a colorless oil.

$^1\text{H}$  NMR (400 MHz,  $\text{CDCl}_3$ ):  $\delta$  4.40 (1H, d,  $J=11.2$  Hz), 4.35 (1H, d,  $J=11.2$  Hz), 4.20 (1H, d,  $J=5.2$  Hz), 3.78-3.67 (2H, m), 3.52 (1H, dd,  $J=6.8, 2.0$  Hz), 3.24 (3H, s), 2.82-2.66 (2H, m), 2.14-1.32 (1H, m).

$^{13}\text{C}\{^1\text{H}\}$  NMR (100 MHz,  $\text{CDCl}_3$ ):  $\delta$  169.5, 82.6, 68.1, 62.1, 56.0, 47.3, 42.5, 39.7, 38.3, 33.0, 23.8.

HRMS (ESI<sup>+</sup>,  $m/z$ ): Calcd. for  $\text{C}_{12}\text{H}_{19}\text{ClNO}_4^+$  ( $[\text{M}+\text{H}]^+$ ): 266.0709. Found: 266.0679.

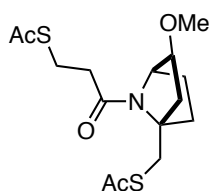

### **10b**

To a solution of **25b** (70.1 mg, 0.21 mmol) in DMF (10 mL) was added potassium thioacetate (78.8 mg, 0.69 mmol). The reaction mixture was stirred at 65°C under Ar atmosphere for 24 h. AcOEt (30 mL) was added to the mixture and the whole was washed with water (30 mL) and brine (20 mL). The combined organic layer was dried over Na<sub>2</sub>SO<sub>4</sub> and the solvent was evaporated to give a crude mixture, which was purified by column-chromatography (eluent: n-hexane: AcOEt= 3:2) to give **10b** (34.3 mg, 0.1 mmol, 49%) as deep brown oil.

<sup>1</sup>H NMR (400 MHz, MeOD): δ 4.14 (1H, t, J=5.2 Hz), 3.760 (2H, s), 3.61 (1H, d, J=6.8 Hz), 3.30 (3H, s), 3.10-3.04 (2H, m), 2.64-2.62 (2H, m), 2.344-2.337 (6H, m), 1.82-1.41 (6H, m).

<sup>13</sup>C{<sup>1</sup>H} NMR (100 MHz, MeOD): δ 197.9, 197.6, 84.0, 68.8, 62.4, 56.6, 44.3, 36.5, 34.0, 33.2, 30.5, 30.2, 25.7, 24.6.

HRMS (ESI<sup>+</sup>, *m/z*): Calcd. for C<sub>15</sub>H<sub>23</sub>NNaO<sub>4</sub>S<sub>2</sub><sup>+</sup> ([M+Na]<sup>+</sup>): 368.0961. Found: 368.0966.

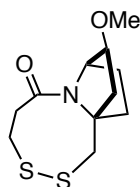

### **11b**

A solution of **10b** (34.3 mg, 0.10 mmol) in anhydrous MeOH (90 mL) was bubbled with N<sub>2</sub> for 1 h, and 28% sodium methoxide (NaOMe) in MeOH (200 μL, 1.03 mmol) was added to the solution. The reaction mixture was stirred at rt under N<sub>2</sub> flow for 35 min. A solution of I<sub>2</sub> (103.3 mg, 0.81 mmol) in Et<sub>2</sub>O (9 mL) was added to the reaction mixture dropwise until the color became pale. The reaction mixture was stirred at rt under N<sub>2</sub> flow for 2 h. Aqueous 10% Na<sub>2</sub>S<sub>2</sub>O<sub>3</sub> (20 mL) was added to the solution and the mixture was evaporated to remove MeOH solvent. The solution was extracted with AcOEt (50 mL × 3), and the organic layer was washed with washed with saturated aqueous solution of NH<sub>4</sub>Cl (30 mL), dried over Na<sub>2</sub>SO<sub>4</sub> and evaporated to give a crude, which was purified by column-chromatography (eluent: n-hexane: EtOH= 3:1) to give **11b** as a pale yellow oil (13.2 mg, 51%).

<sup>1</sup>H NMR (400 MHz, CDCl<sub>3</sub>): δ 4.951-4.937 (1H, m), 3.745-3.642 (1H, m), 3.553-3.432 (1H, m), 3.287 (3H, s), 3.184-2.576 (6H, m), 2.027-1.282 (5H, m).

<sup>13</sup>C{<sup>1</sup>H} NMR (100 MHz, CDCl<sub>3</sub>): δ 167.30, 80.24, 66.69, 57.00, 56.74, 50.13, 37.11, 35.89, 32.18, 23.10.

HRMS (ESI<sup>+</sup>, *m/z*): Calcd. for C<sub>11</sub>H<sub>17</sub>NO<sub>2</sub>S<sub>2</sub>Na<sup>+</sup> ([M+Na]<sup>+</sup>): 282.0593. Found: 282.0604.

HPLC (210 nm, CH<sub>3</sub>CN: H<sub>2</sub>O=7:3): t<sub>R</sub> 8.17 min, 98%.

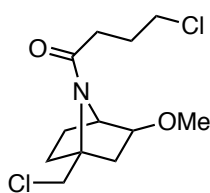

### 25c

To a solution of **24** (189.2 mg, 0.72 mmol) in anhydrous  $\text{CH}_2\text{Cl}_2$  (8 mL) was added pyridine (1 mL, 12.5 mmol) at  $0^\circ\text{C}$ . A solution of methanesulfonyl chloride (0.9 mL, 11.6 mmol) was added dropwise to the mixture and the reaction mixture was stirred at rt for 48 h.  $\text{CH}_2\text{Cl}_2$  (20 mL) was added to the mixture and the whole was washed with water (10 mL  $\times$  2), saturated aqueous solution of  $\text{NH}_4\text{Cl}$  (30 mL  $\times$  10), saturated aqueous solution of  $\text{NaHCO}_3$  (30 mL) and brine (20 mL), dried over  $\text{Na}_2\text{SO}_4$ , and evaporated to give **25c** (106.8 mg, 0.38 mmol, 53%) as a colorless oil, which was used for the next reaction without further purification.

$^1\text{H}$  NMR (400 MHz,  $\text{CDCl}_3$ ):  $\delta$  4.41 (2H, d,  $J = 2.4$  Hz), 4.29 (1H, d,  $J = 5.2$  Hz), 3.70-3.59 (2H, m), 3.57 (1H, dd,  $J = 6.8$  Hz, 2.4 Hz), 3.29 (1H, s), 2.52-1.70 (6H, m).

HRMS (ESI $^+$ ,  $m/z$ ): Calcd. for  $\text{C}_{12}\text{H}_{20}\text{Cl}_2\text{NO}_2^+$  ( $[\text{M}+\text{H}]^+$ ): 280.0860. Found: 280.0859.

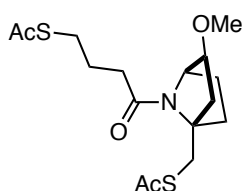

### 10c

To a solution of **25c** (106.8 mg, 0.38 mmol) in DMF (20 mL) was added potassium thioacetate (236.4 mg, 2.07 mmol). The reaction mixture was stirred at  $65^\circ\text{C}$  under Ar atmosphere for 24 h. AcOEt (100 mL) was added to the mixture and the whole was washed with water (200 mL) and brine (40 mL). The combined organic layer was dried over  $\text{Na}_2\text{SO}_4$ , and evaporated to give a crude mixture, which was purified by column-chromatography (eluent: n-hexane: AcOEt = 3:2) to give **10c** (62.5 mg, 0.17 mmol, 46%) as deep brown oil.

$^1\text{H}$  NMR (400 MHz, MeOD):  $\delta$  4.34 (1H, d,  $J = 5.6$  Hz), 3.74 (2H, s), 3.59 (1H, dd,  $J = 7.2$ , 2.4 Hz), 3.29 (3H, s), 2.92-2.90 (2H, m), 2.40-2.36 (2H, m), 2.32 (6H, s), 2.01-1.64 (8H, m).

$^{13}\text{C}\{^1\text{H}\}$  NMR (100 MHz, MeOD):  $\delta$  197.6, 196.9, 173.2, 83.7, 68.2, 62.1, 56.2, 43.9, 34.8, 33.6, 32.9, 30.2, 29.8, 29.0, 26.3, 24.3.

HRMS (ESI $^+$ ,  $m/z$ ): Calcd. for  $\text{C}_{16}\text{H}_{25}\text{S}_2\text{NNaO}_4^+$  ( $[\text{M}+\text{Na}]^+$ ): 382.1117. Found: 382.1115.

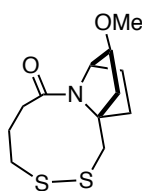

### **11c**

A solution of **10c** (62.5 mg, 0.18 mmol) in anhydrous MeOH (150 mL) was bubbled with N<sub>2</sub> for 1 h, and 28% sodium methoxide (NaOMe) in MeOH (200 μL, 1.03 mmol) was added to the solution. The reaction mixture was stirred at rt under N<sub>2</sub> flow for 35 min. A solution of I<sub>2</sub> (215.8mg, 1.70 mmol) in Et<sub>2</sub>O (9 mL) was added to the reaction mixture dropwise until the color became pale. The reaction mixture was stirred at rt under N<sub>2</sub> flow for 2 h. Aqueous 10% Na<sub>2</sub>S<sub>2</sub>O<sub>3</sub> (20 mL) was added to the solution and the mixture was evaporated to remove MeOH solvent. The solution was extracted with AcOEt (50 mL × 3), and the organic layer was washed with washed with saturated aqueous solution of NH<sub>4</sub>Cl (30 mL), dried over Na<sub>2</sub>SO<sub>4</sub> and evaporated to give a crude, which was purified by column-chromatography (eluent: n-hexane: EtOH=3:1) to give **11c** as a pale yellow oil (31.6 mg, 0.12 mmol, 62%).

<sup>1</sup>H NMR (400 MHz, CDCl<sub>3</sub>): δ 5.02-4.92 (1H, m), 3.57-3.43 (3H, m), 3.29-3.25 (3H, m), 3.06-2.66 (6H, m), 2.31-1.18 (6H, m).

<sup>13</sup>C{<sup>1</sup>H} NMR (100 MHz, MeOD):

δ 174.6, 84.3, 81.2, 69.5, 60.5, 56.6, 46.7, 42.7, 37.6, 32.6, 24.7, 22.5.

HRMS (ESI<sup>+</sup>, *m/z*): Calcd. for C<sub>12</sub>H<sub>19</sub>NO<sub>2</sub>S<sub>2</sub>Na<sup>+</sup> ([M+Na]<sup>+</sup>): 296.0749. Found: 296.0742.

HPLC (210 nm, CH<sub>3</sub>CN: H<sub>2</sub>O=7:3): t<sub>R</sub> 9.12 min, 99%.

### 3. <sup>1</sup>H and <sup>13</sup>C-NMR Charts of synthesized compounds

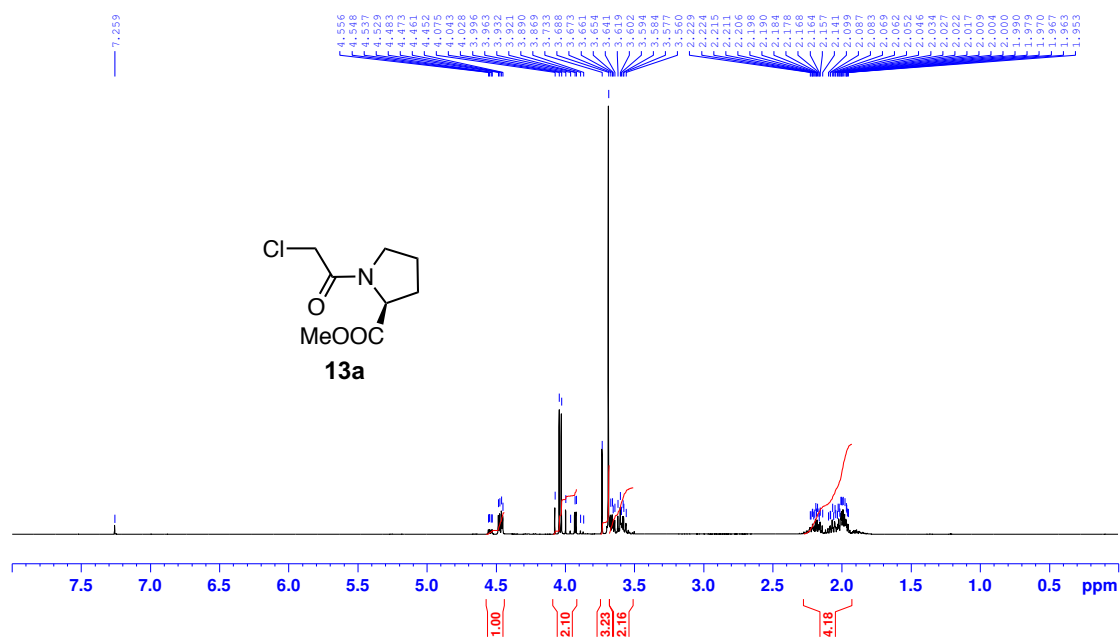

Figure S17. <sup>1</sup>H NMR spectrum of **13a** in CDCl<sub>3</sub>.

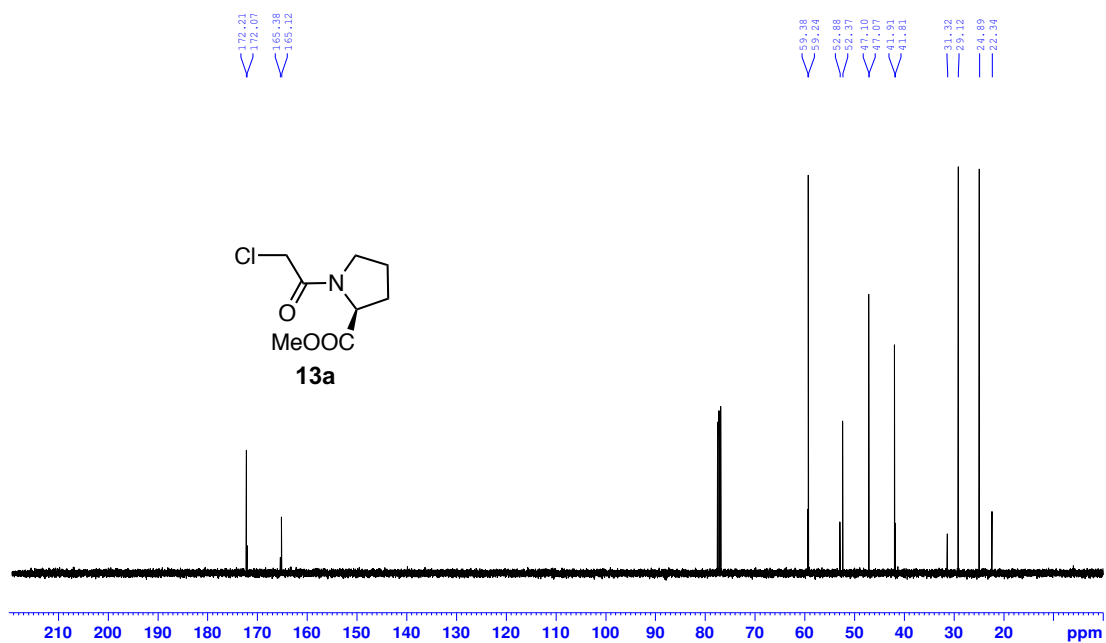

Figure S18. <sup>13</sup>C NMR spectrum of **13a** in CDCl<sub>3</sub>.

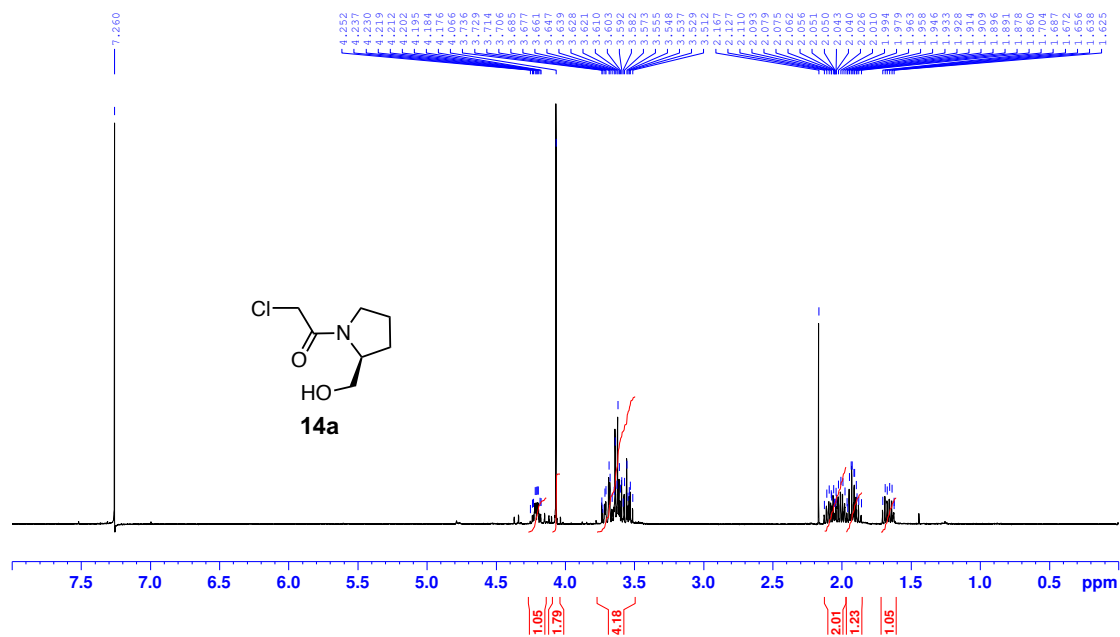

**Figure S19.**  $^1\text{H}$  NMR spectrum of **14a** in  $\text{CDCl}_3$ .

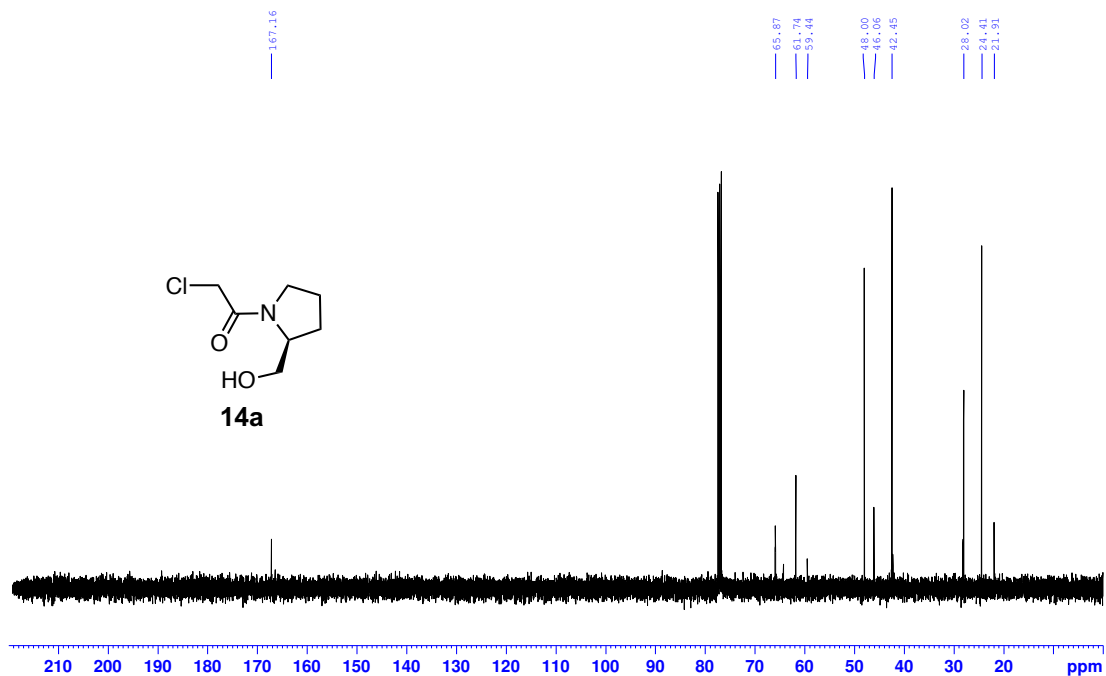

**Figure S20.**  $^{13}\text{C}$  NMR spectrum of **14a** in  $\text{CDCl}_3$ .

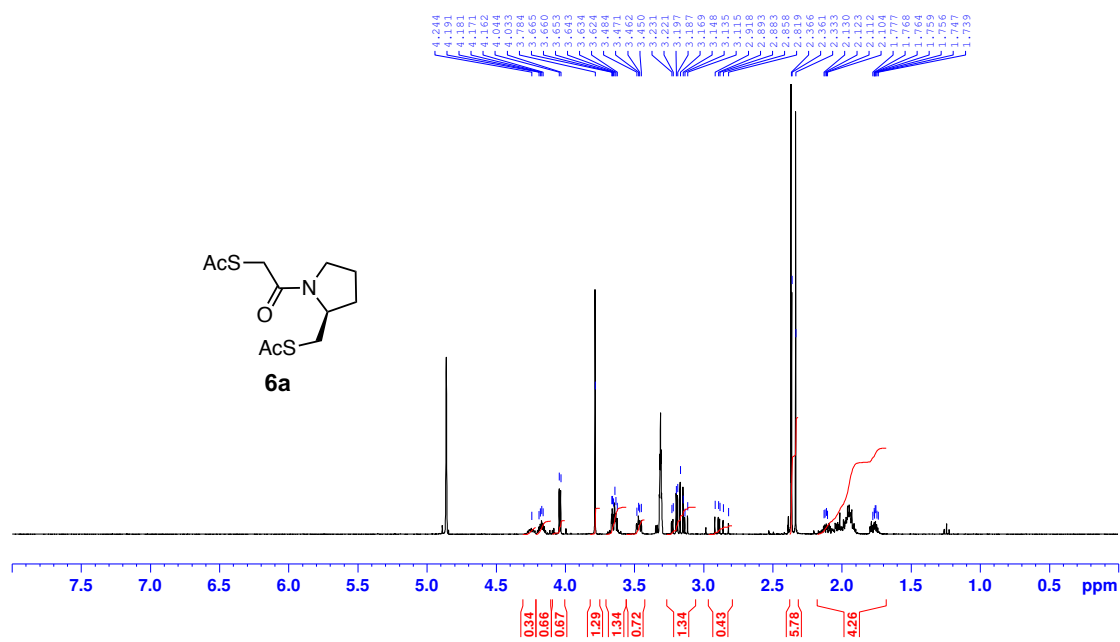

**Figure S21.** <sup>1</sup>H NMR spectrum of **6a** in MeOD.

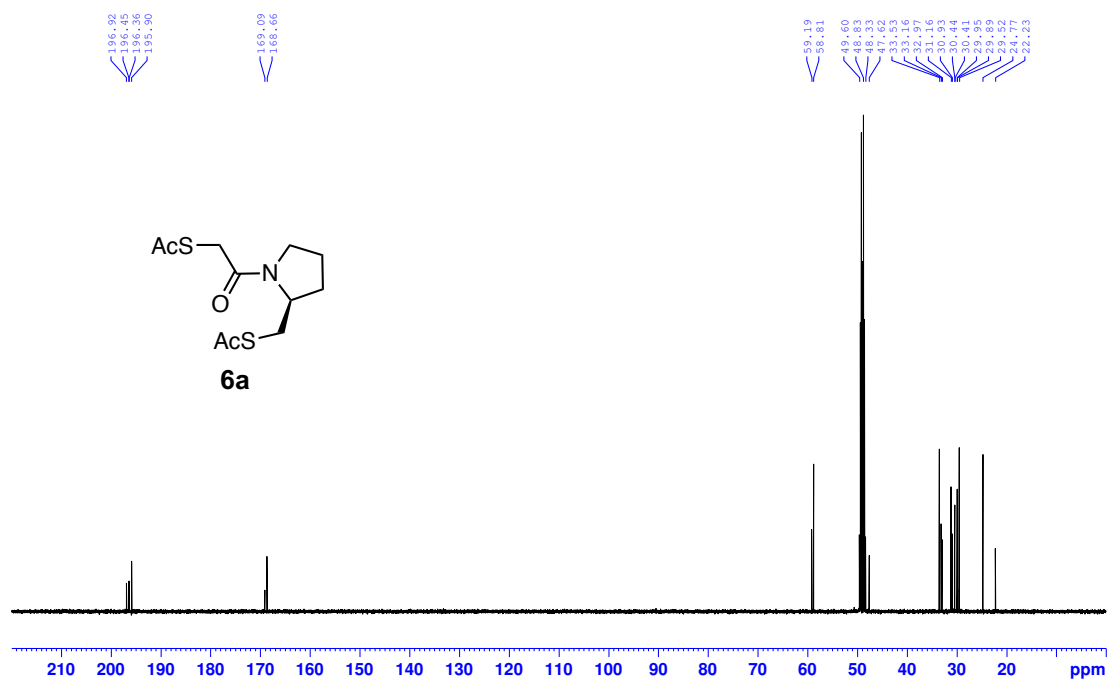

**Figure S22.** <sup>13</sup>C NMR spectrum of **6a** in MeOD.



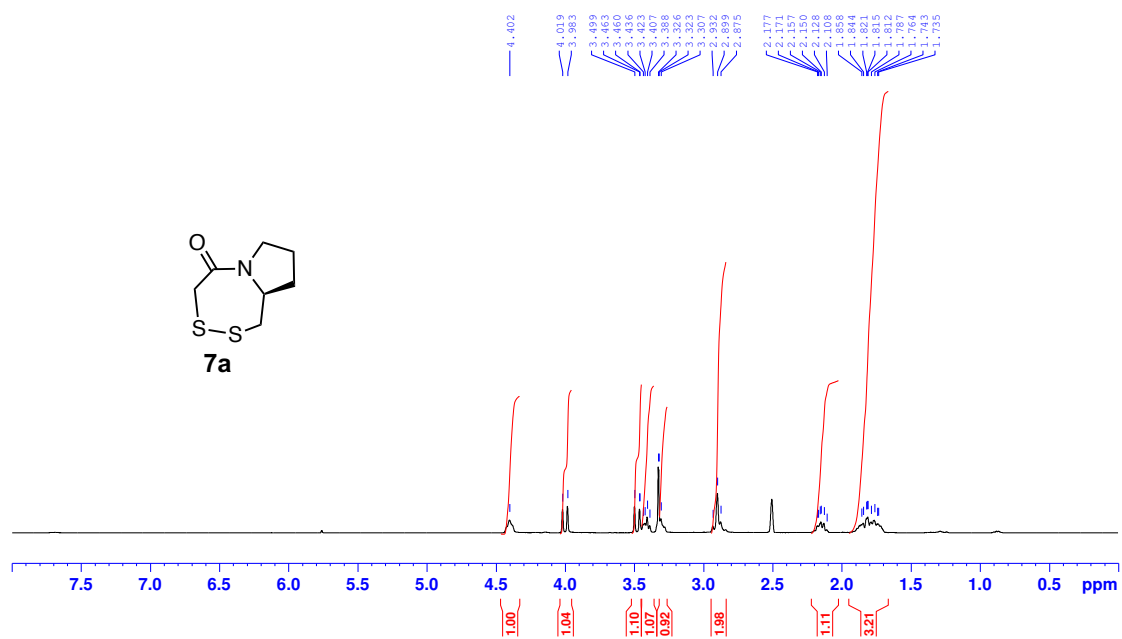

**Figure S23.** <sup>1</sup>H NMR spectrum of **7a** in DMSO-*d*<sub>6</sub>.

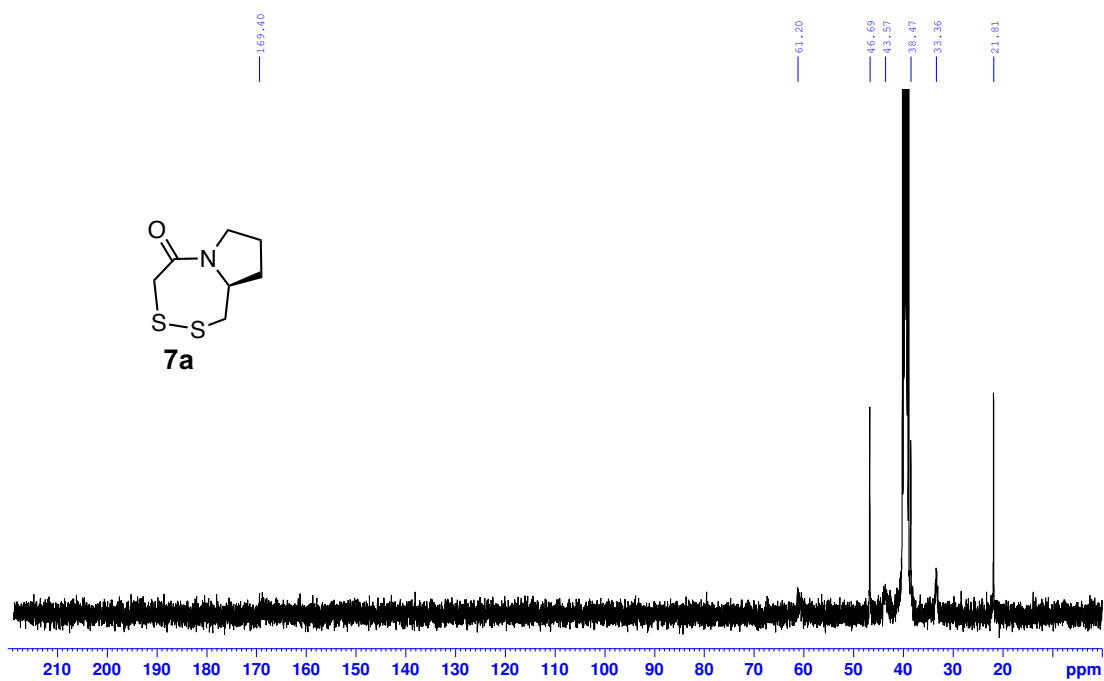

**Figure S24.** <sup>13</sup>C NMR spectrum of **7a** in DMSO-*d*<sub>6</sub>.

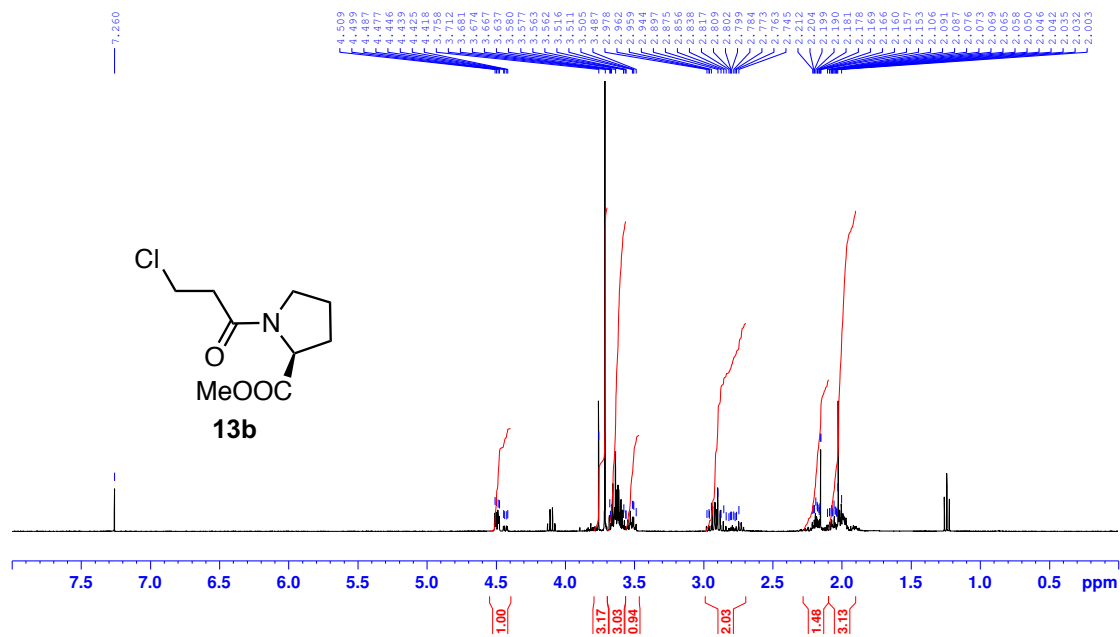

**Figure S25.** <sup>1</sup>H NMR spectrum of **13b** in CDCl<sub>3</sub>.

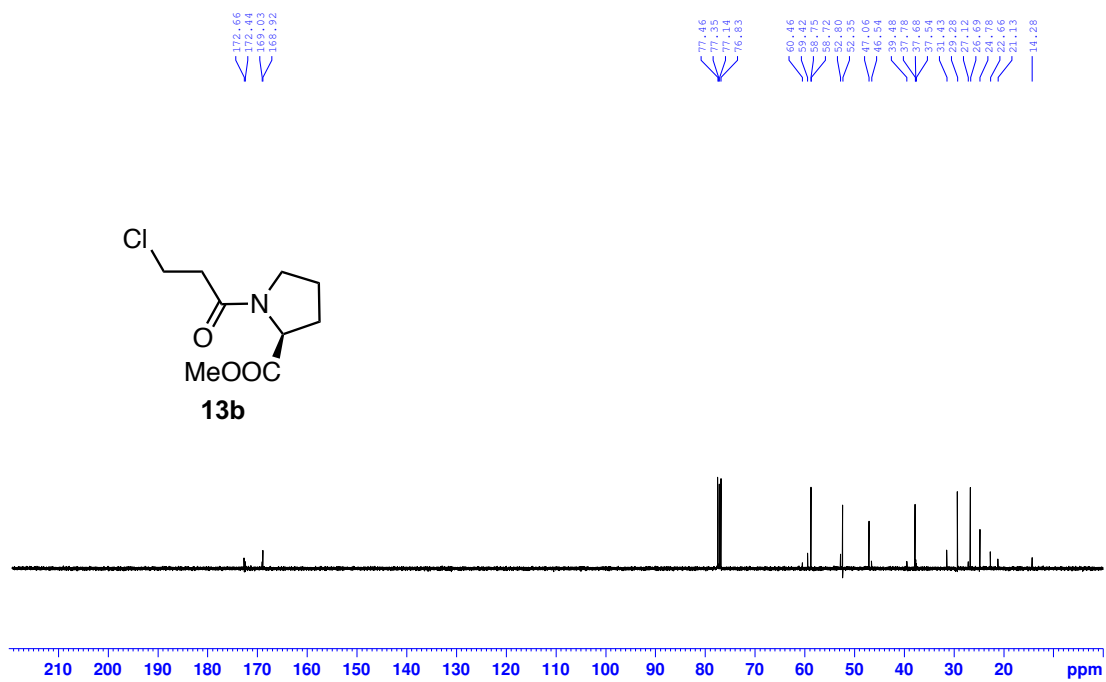

**Figure S26.** <sup>13</sup>C NMR spectrum of **13b** in CDCl<sub>3</sub>.

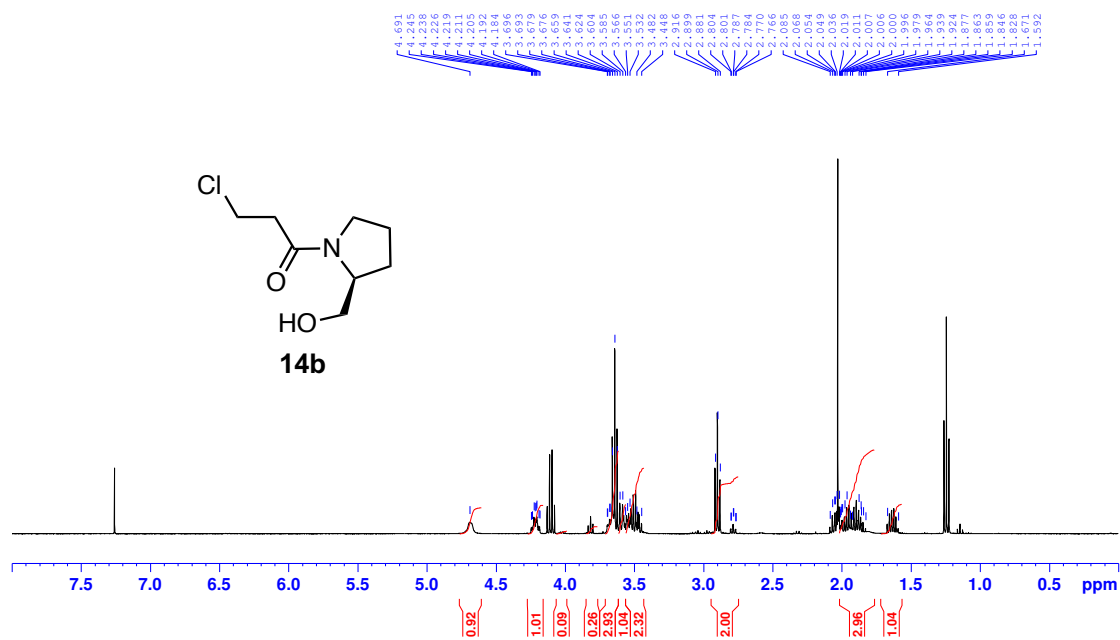

**Figure S27.** <sup>1</sup>H NMR spectrum of **14b** in CDCl<sub>3</sub>.

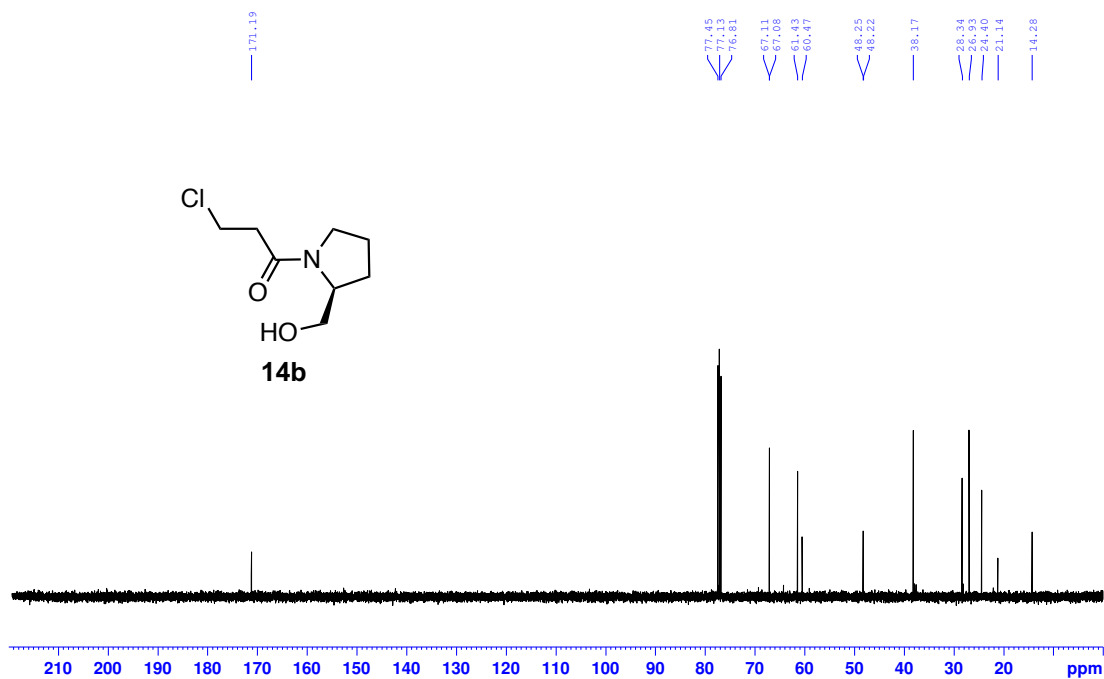

**Figure S28.** <sup>13</sup>C NMR spectrum of **14b** in CDCl<sub>3</sub>.

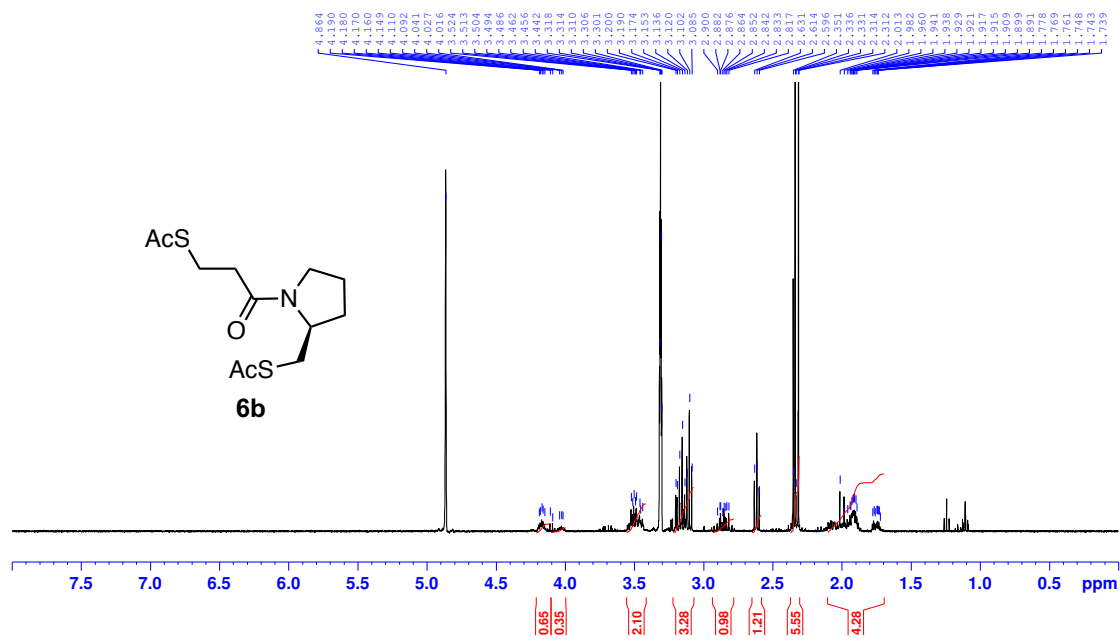

**Figure S29.** <sup>1</sup>H NMR spectrum of **6b** in MeOD.

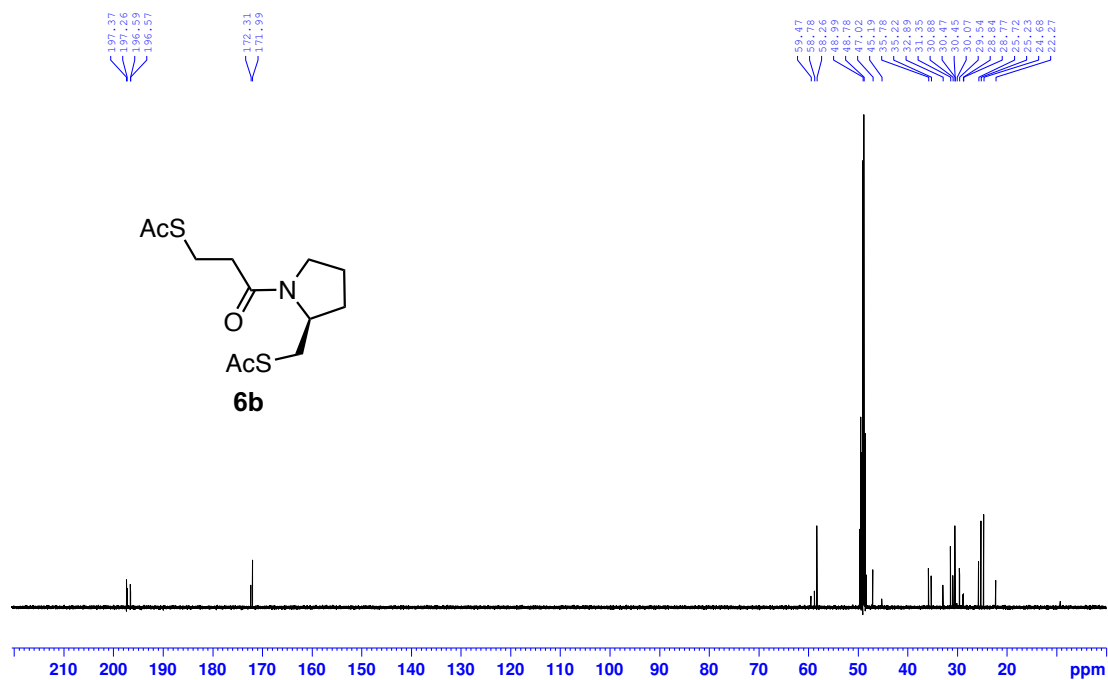

**Figure S30.** <sup>13</sup>C NMR spectrum of **6b** in MeOD.

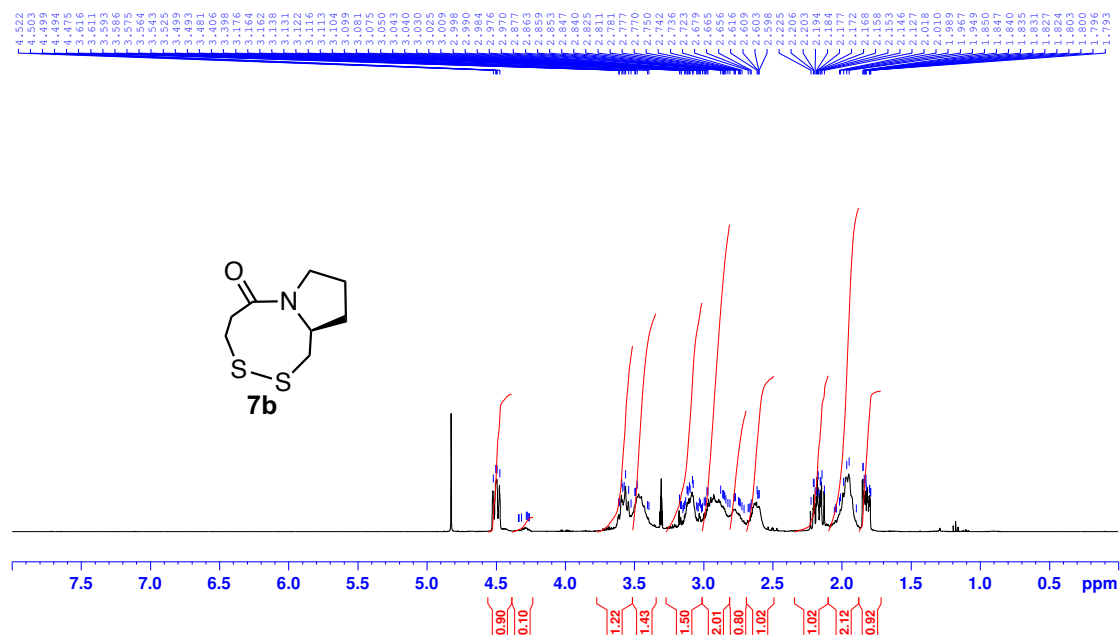

Figure S31. <sup>1</sup>H NMR spectrum of **7b** in MeOD.

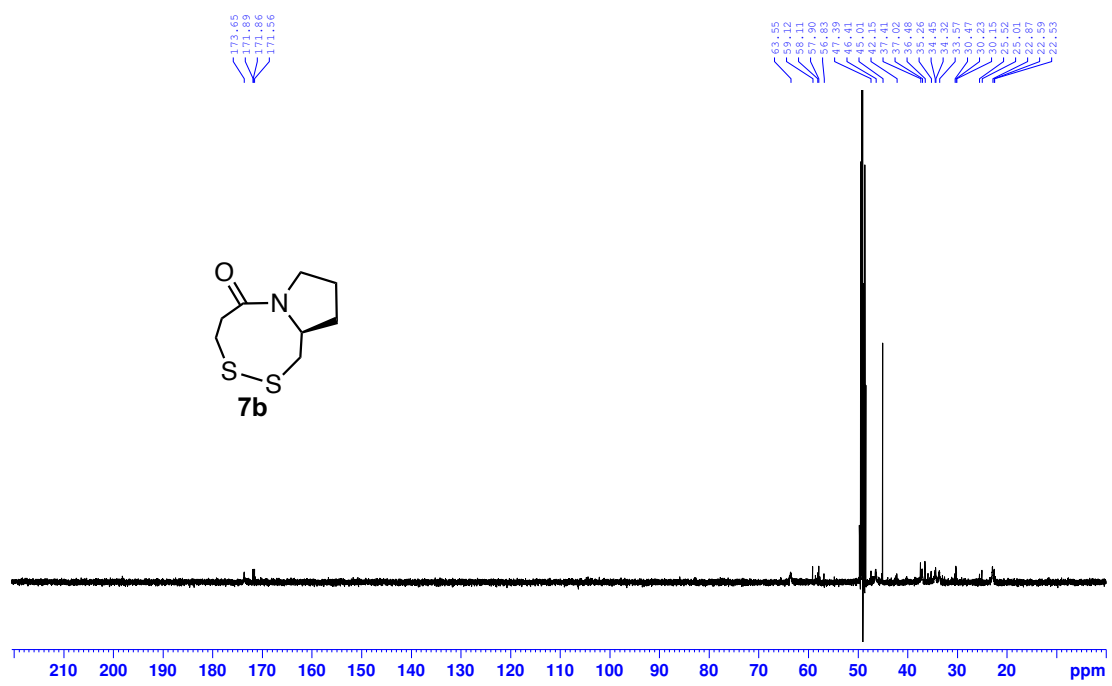

Figure S32. <sup>13</sup>C NMR spectrum of **7b** in MeOD.

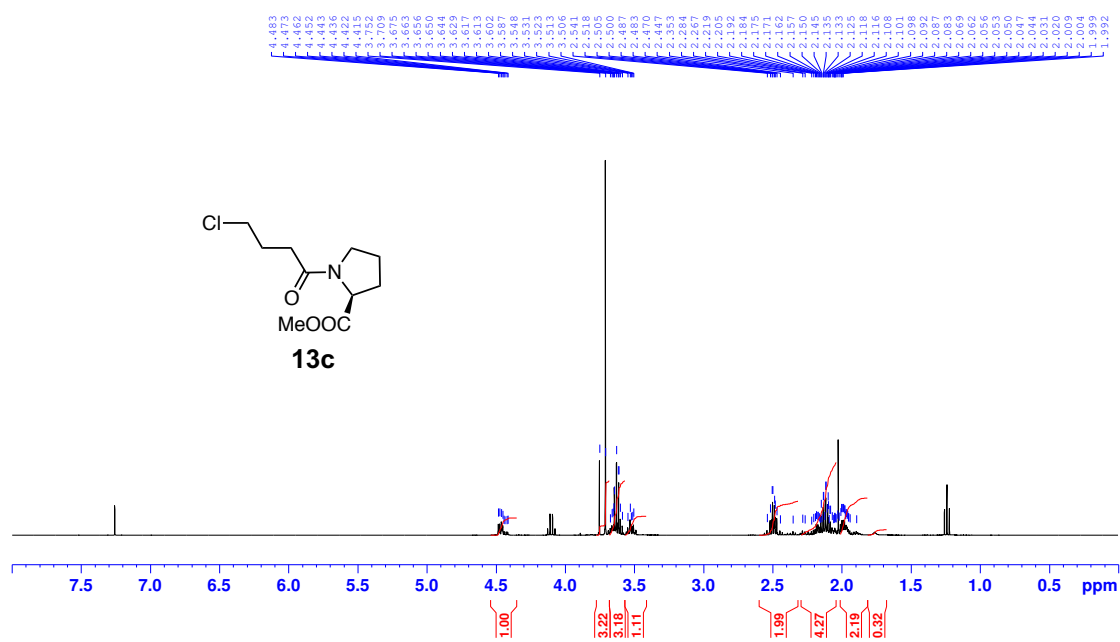

Figure S33. <sup>1</sup>H NMR spectrum of **13c** in CDCl<sub>3</sub>.

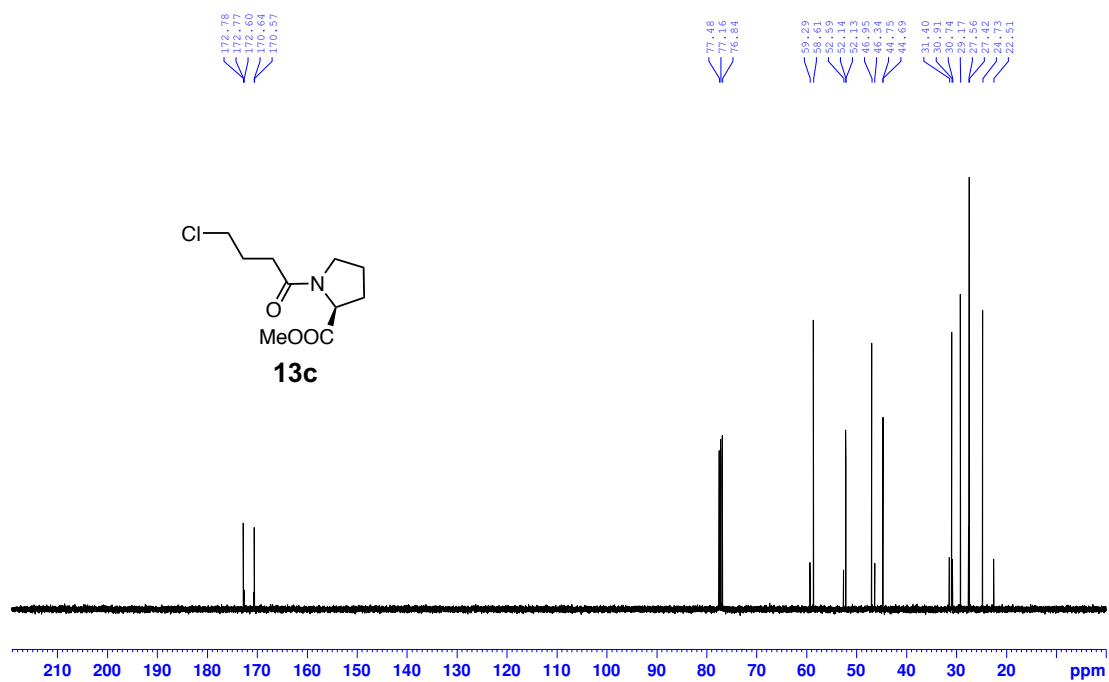

Figure S34. <sup>13</sup>C NMR spectrum of **13c** in CDCl<sub>3</sub>.

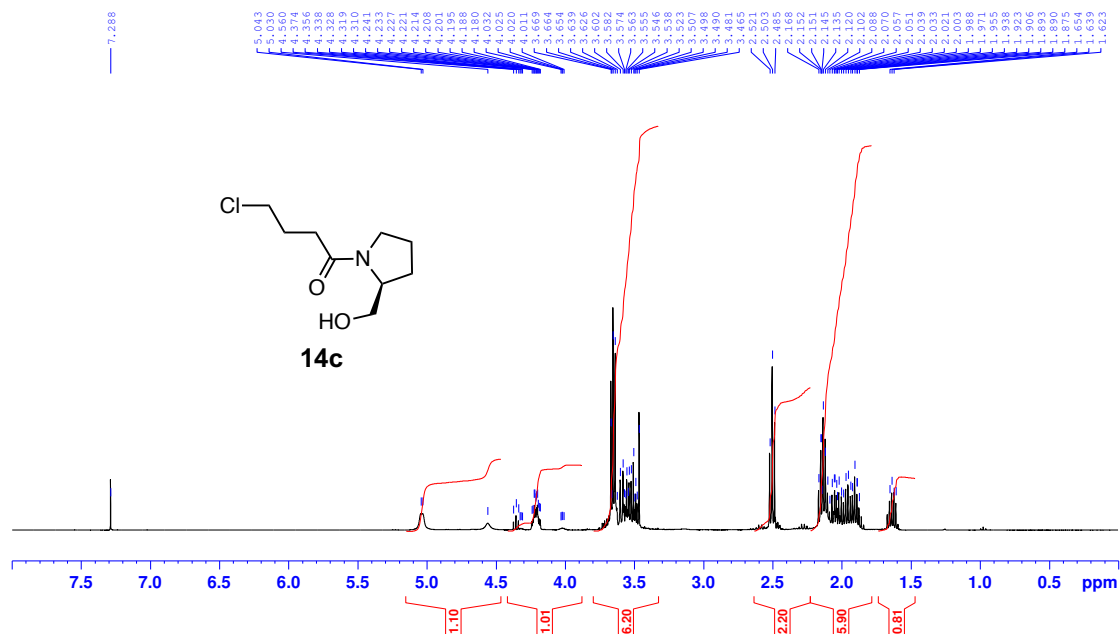

**Figure S35.** <sup>1</sup>H NMR spectrum of **14c** in CDCl<sub>3</sub>.

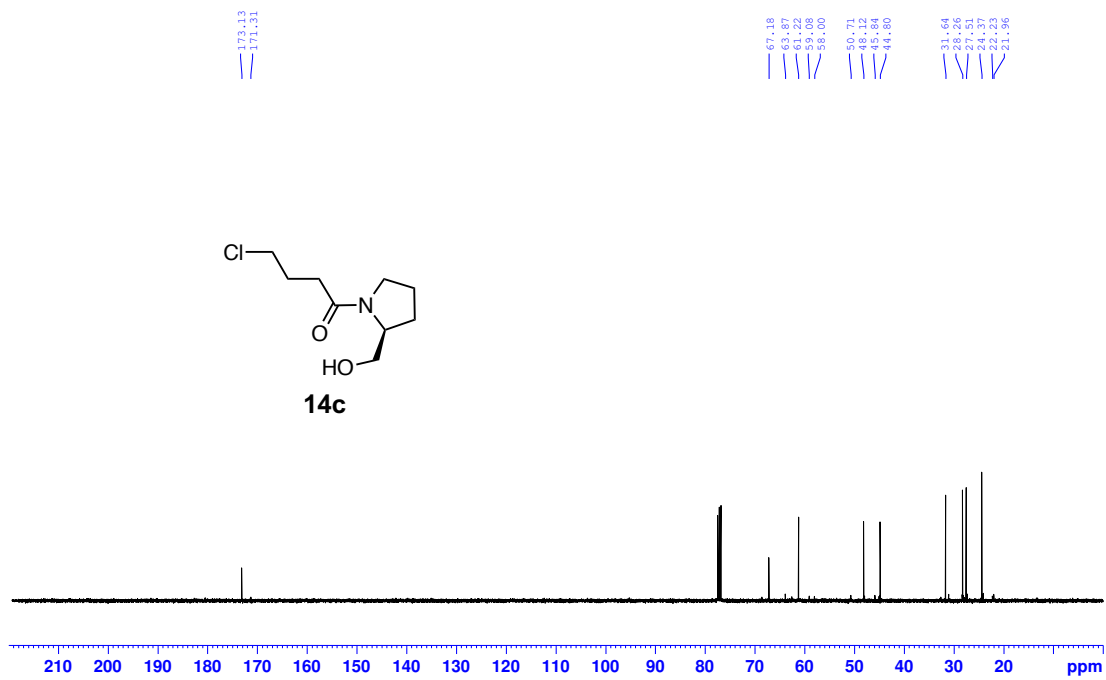

**Figure S36.** <sup>13</sup>C NMR spectrum of **14c** in CDCl<sub>3</sub>.

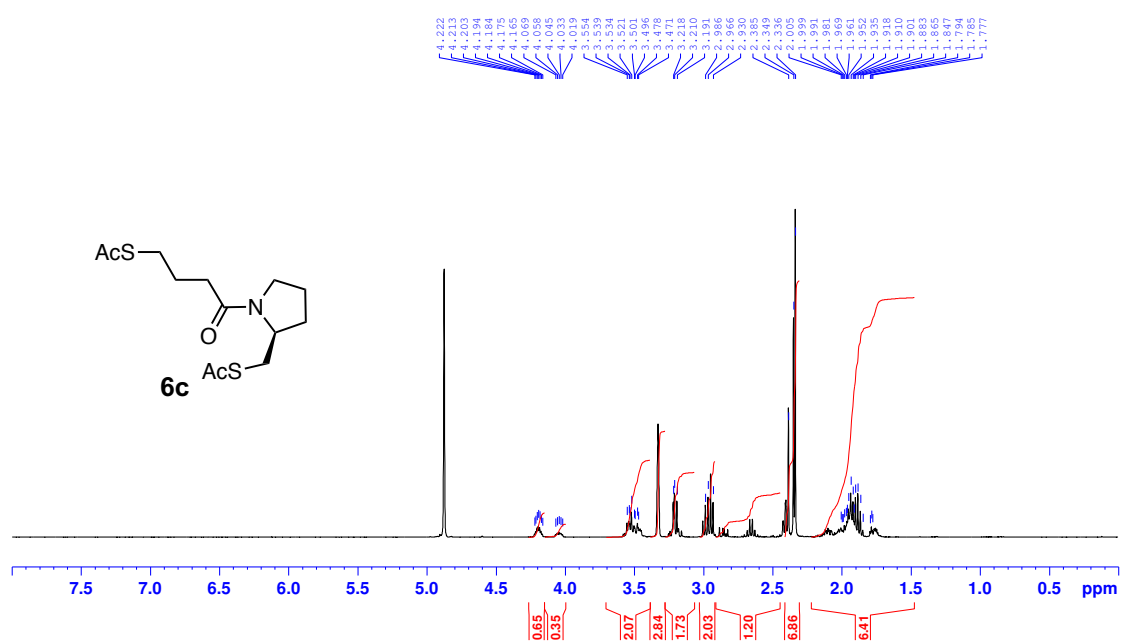

Figure S37. <sup>1</sup>H NMR spectrum of **6c** in CDCl<sub>3</sub>.

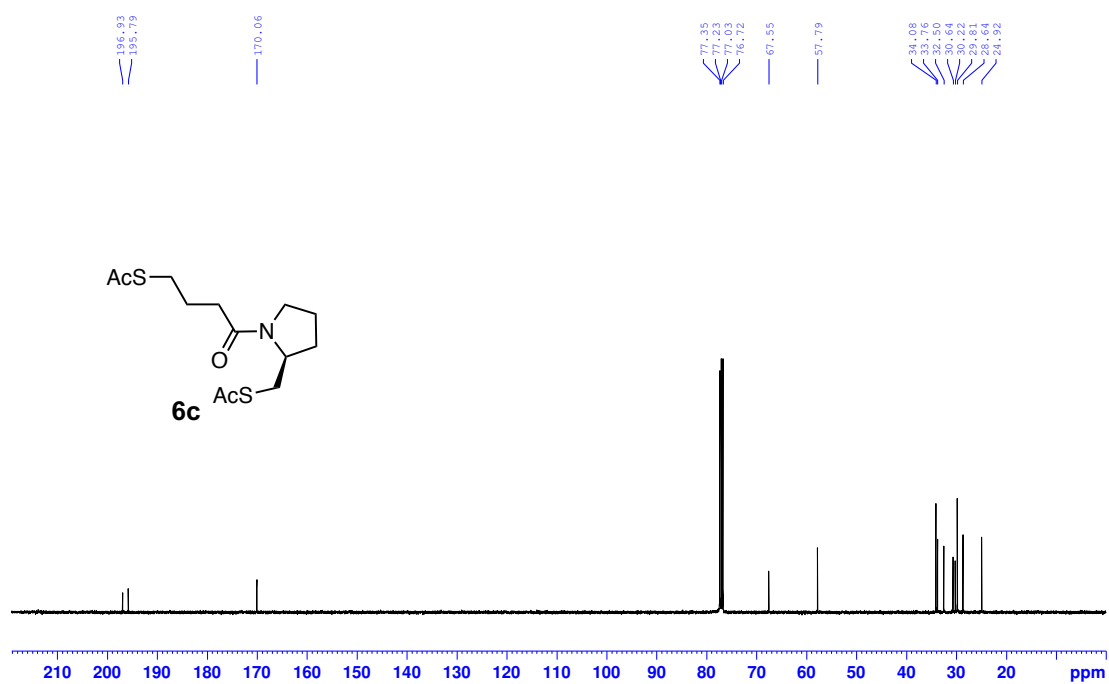

Figure S38. <sup>13</sup>C NMR spectrum of **6c** in CDCl<sub>3</sub>.



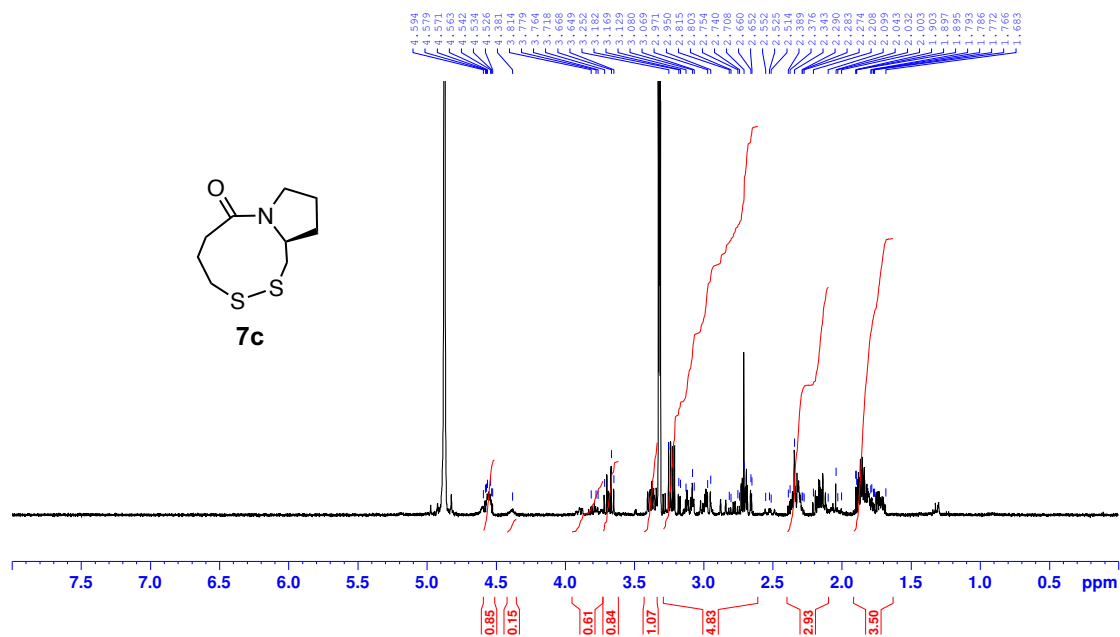

**Figure S39.**  $^1\text{H}$  NMR spectrum of **7c** in MeOD at 274.6 K.

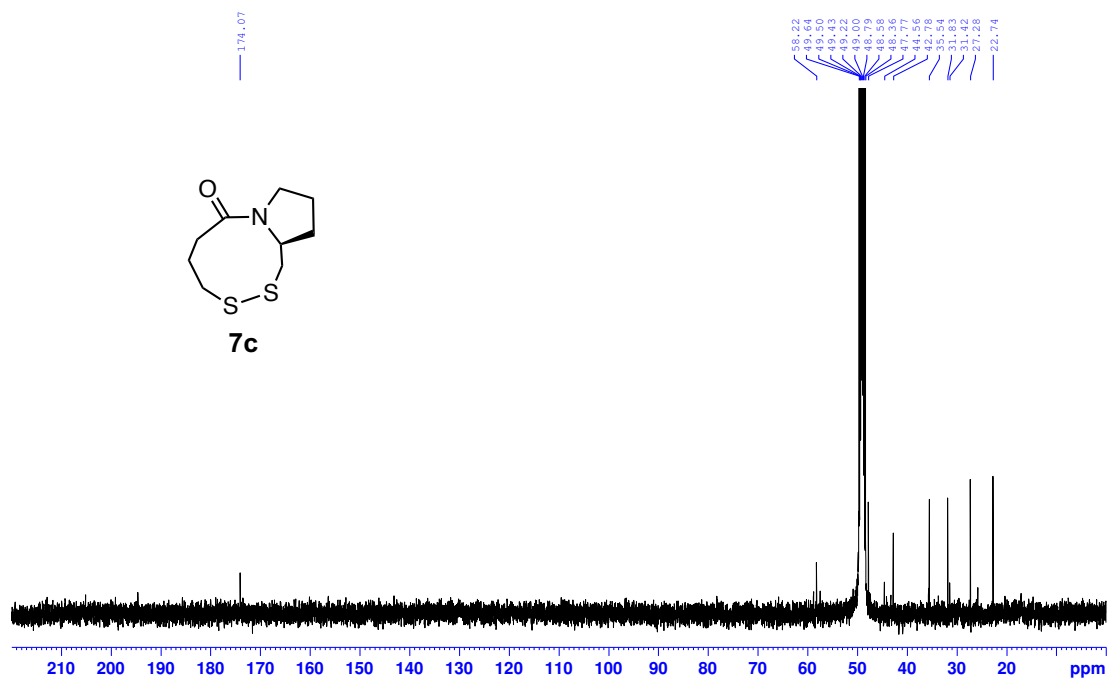

**Figure S40.**  $^{13}\text{C}$  NMR spectrum of **7c** in MeOD at 274.6 K.

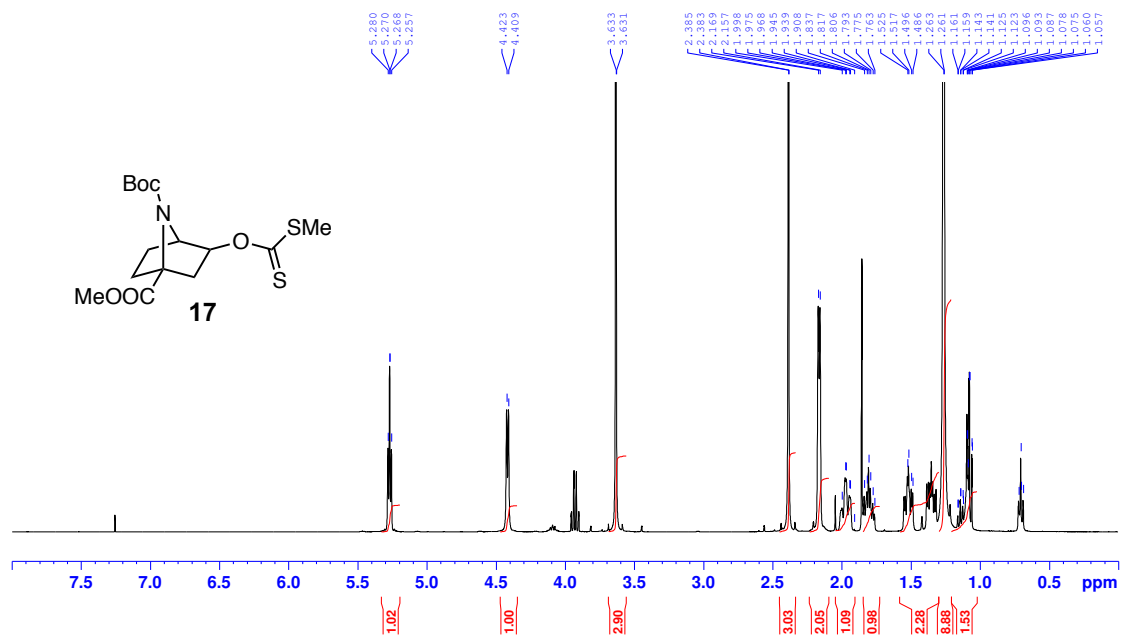

**Figure S41.** <sup>1</sup>H NMR spectrum of **17** in CDCl<sub>3</sub>.

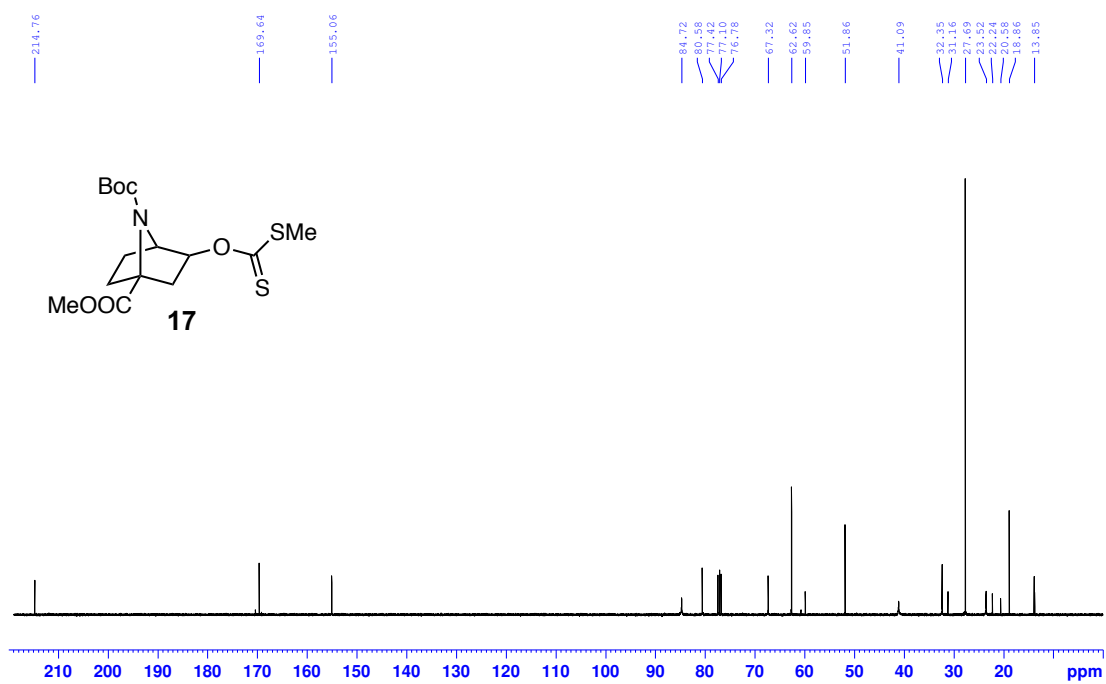

**Figure S42.** <sup>13</sup>C NMR spectrum of **17** in CDCl<sub>3</sub>.

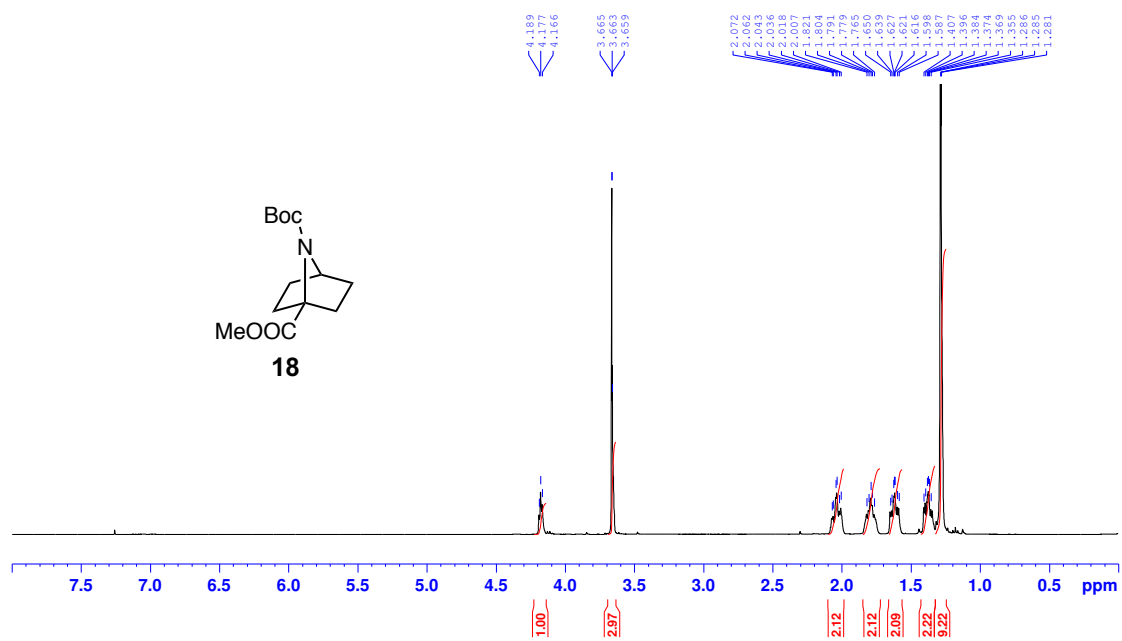

Figure S43. <sup>1</sup>H NMR spectrum of **18** in CDCl<sub>3</sub>.

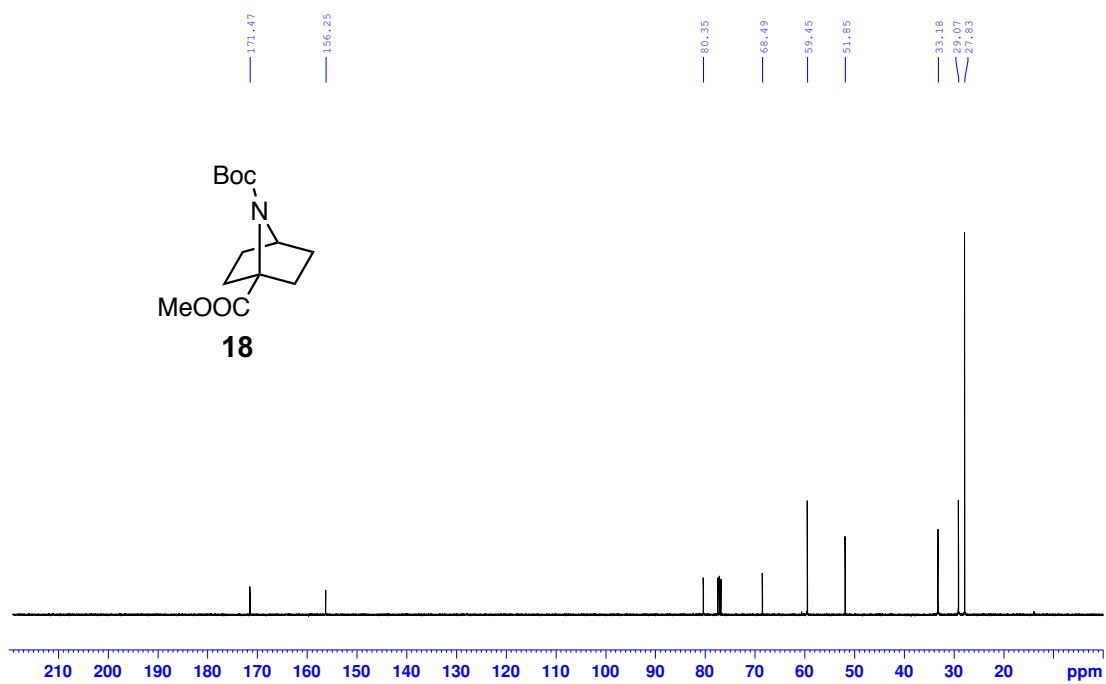

Figure S44. <sup>13</sup>C NMR spectrum of **18** in CDCl<sub>3</sub>.

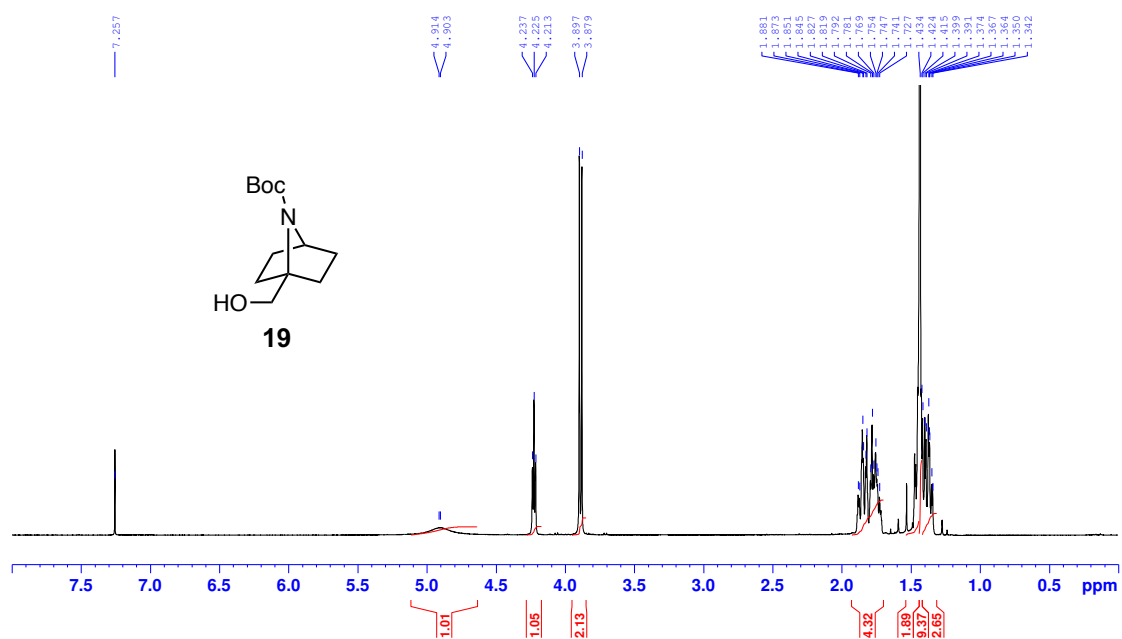

Figure S45. <sup>1</sup>H NMR spectrum of **19** in CDCl<sub>3</sub>.

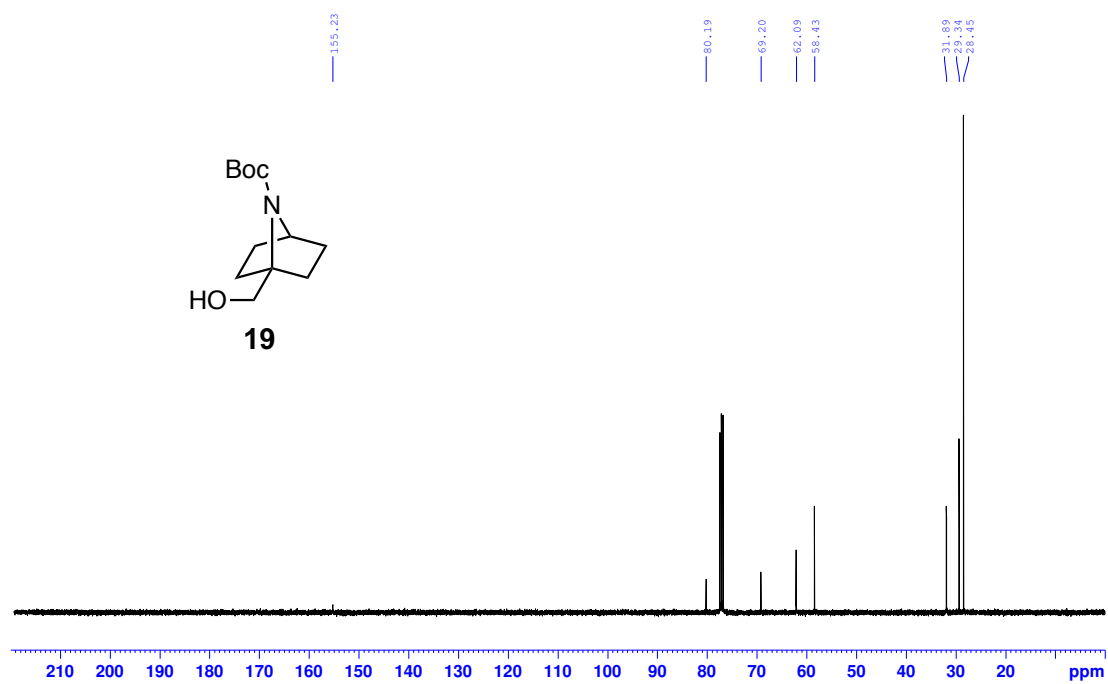

Figure S46. <sup>13</sup>C NMR spectrum of **19** in CDCl<sub>3</sub>.

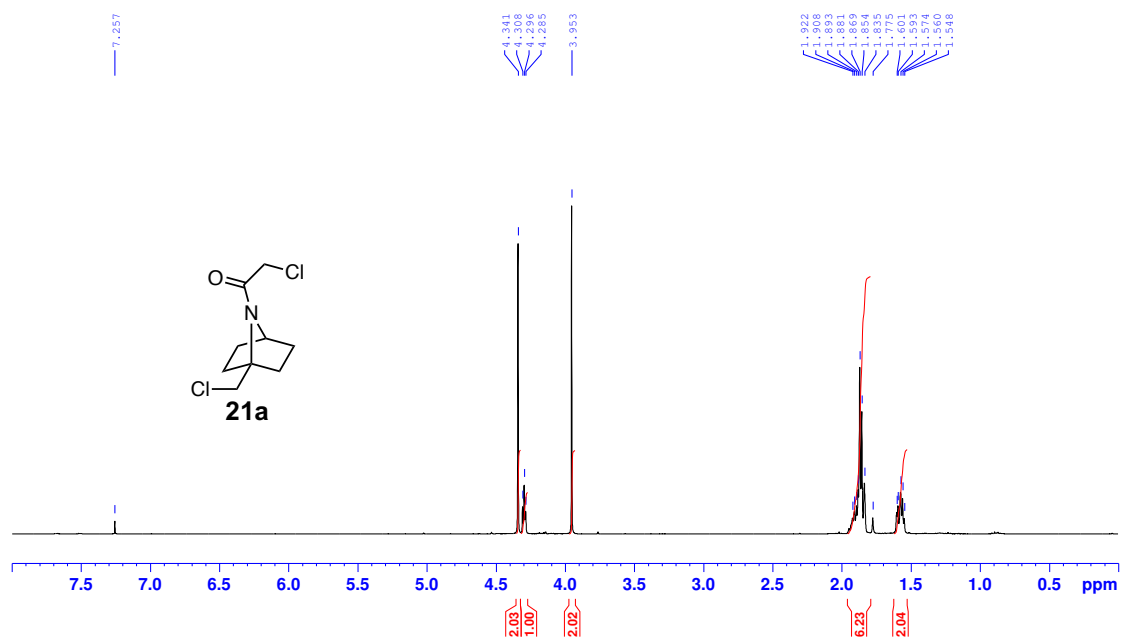

**Figure S47.** <sup>1</sup>H NMR spectrum of **21a** in CDCl<sub>3</sub>.

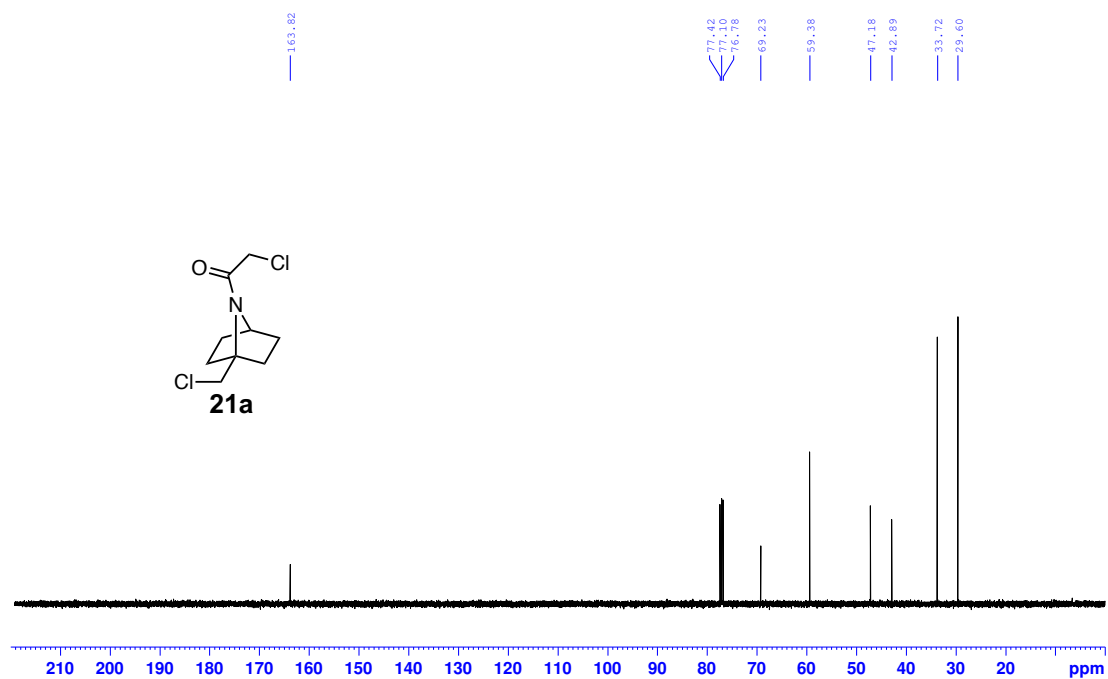

**Figure S48.** <sup>13</sup>C NMR spectrum of **21a** in CDCl<sub>3</sub>.

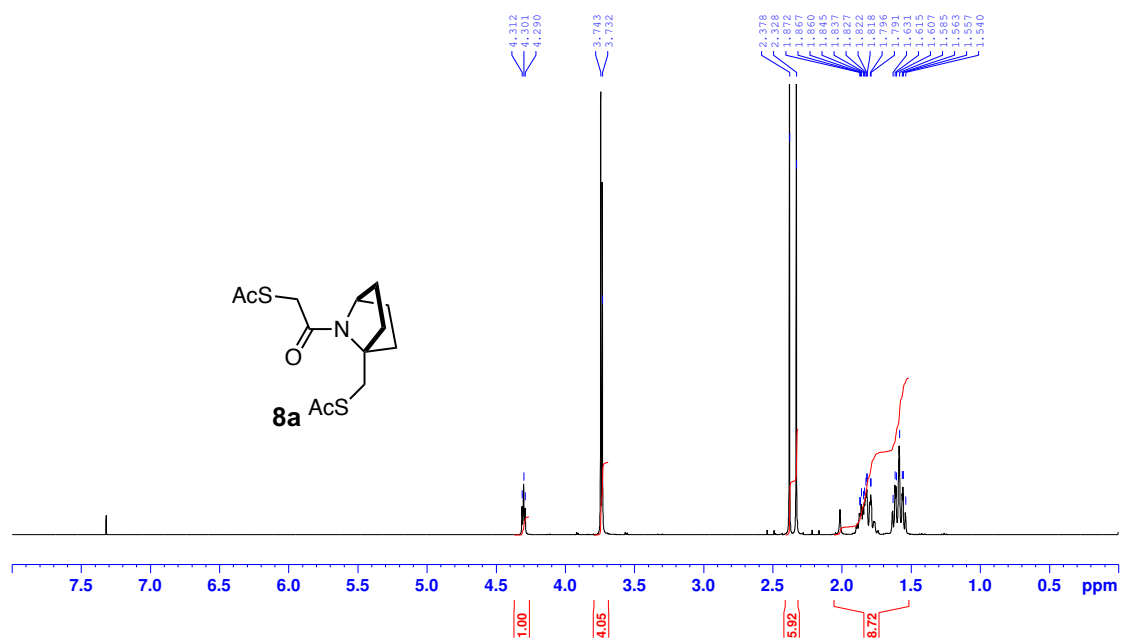

**Figure S49.** <sup>1</sup>H NMR spectrum of **8a** in CDCl<sub>3</sub>.

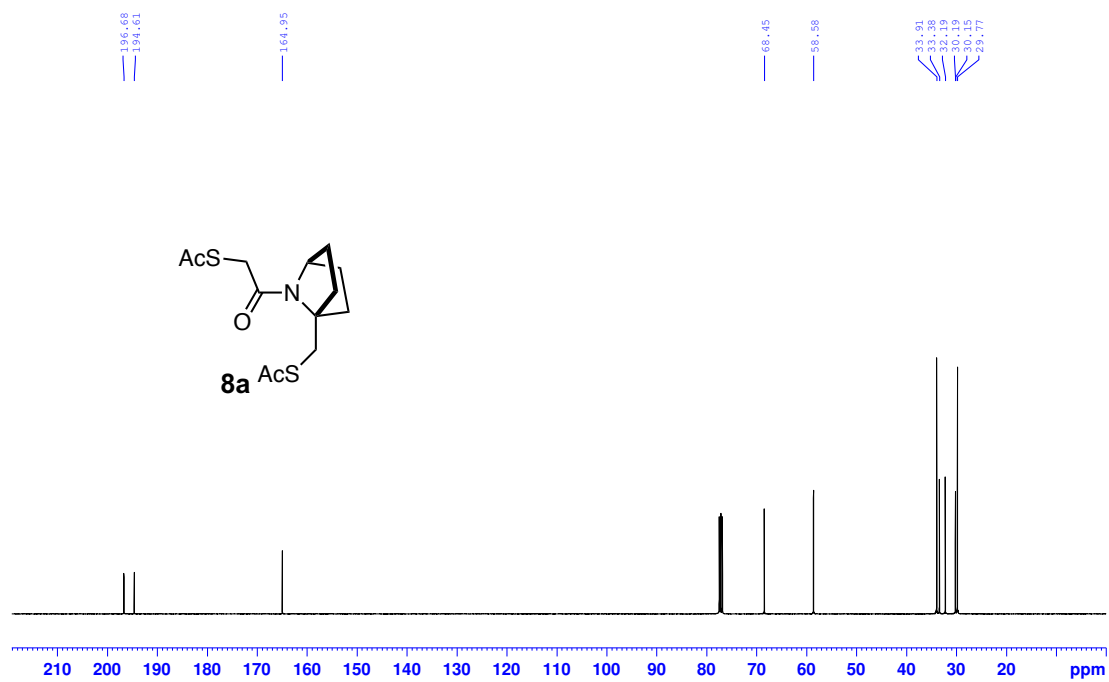

**Figure S50.** <sup>13</sup>C NMR spectrum of **8a** in CDCl<sub>3</sub>.

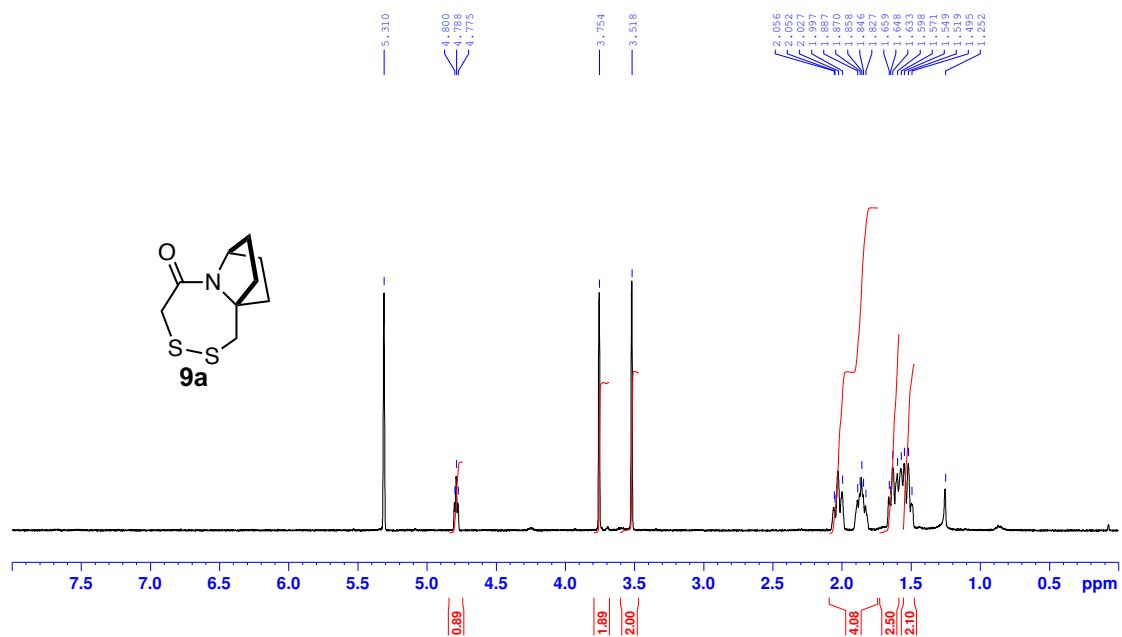

**Figure S51.** <sup>1</sup>H NMR spectrum of **9a** in CD<sub>2</sub>Cl<sub>2</sub>.

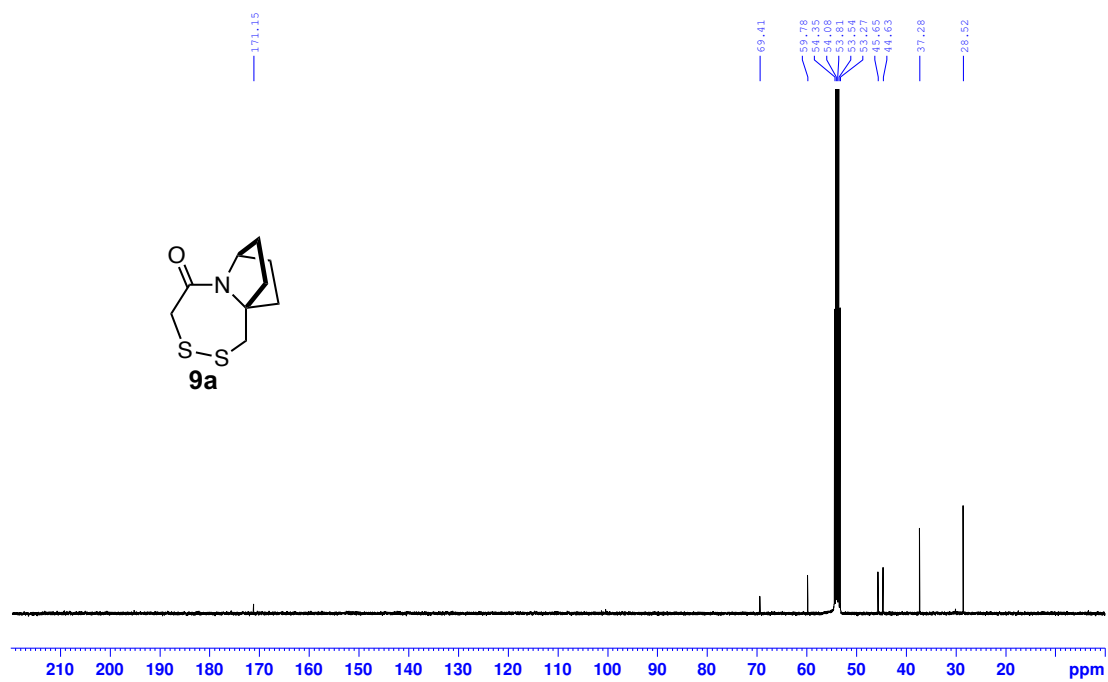

**Figure S52.** <sup>13</sup>C NMR spectrum of **9a** in CD<sub>2</sub>Cl<sub>2</sub>.

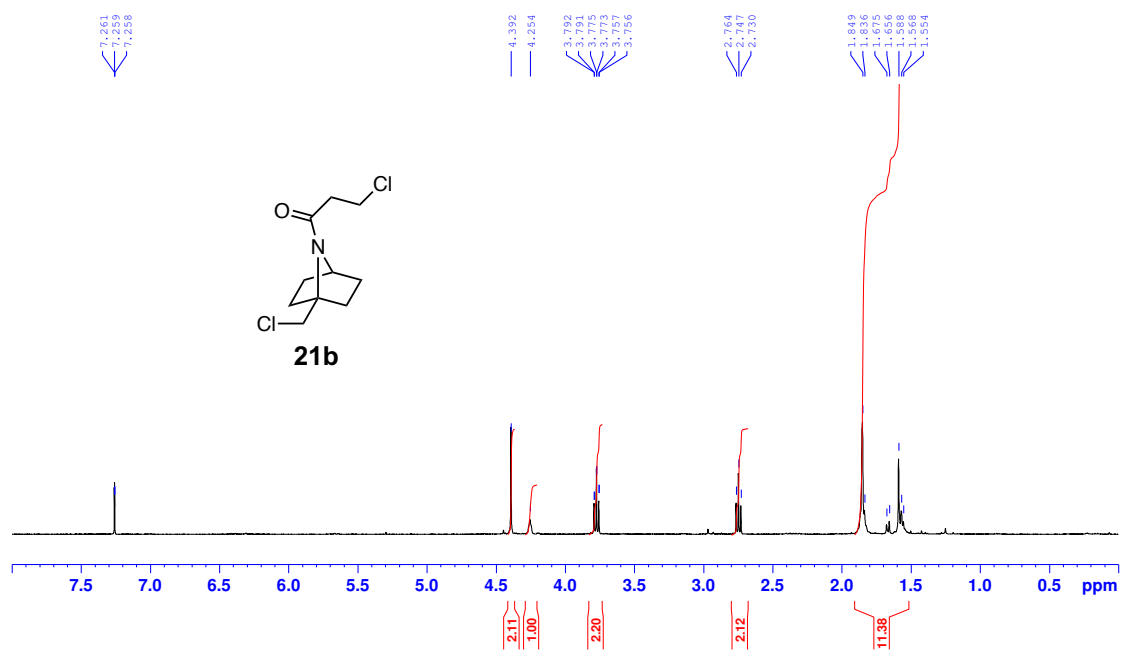

**Figure S53.** <sup>1</sup>H NMR spectrum of **21b** in CDCl<sub>3</sub>.

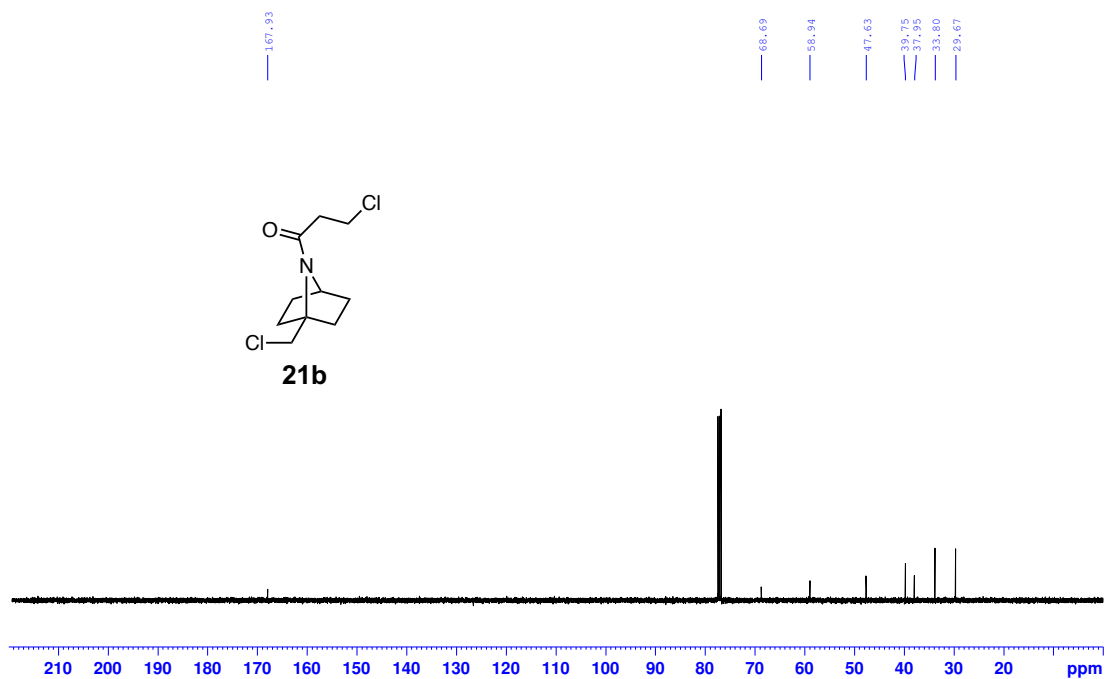

**Figure S54.** <sup>13</sup>C NMR spectrum of **21b** in CDCl<sub>3</sub>.



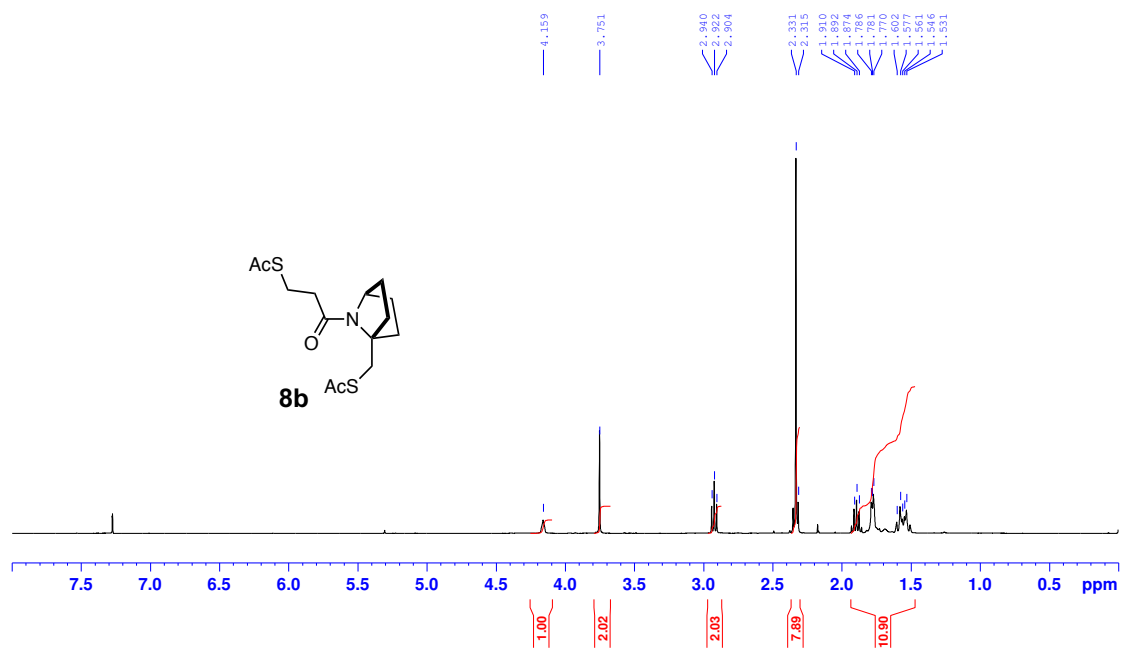

**Figure S55.** <sup>1</sup>H NMR spectrum of **8b** in CDCl<sub>3</sub>.

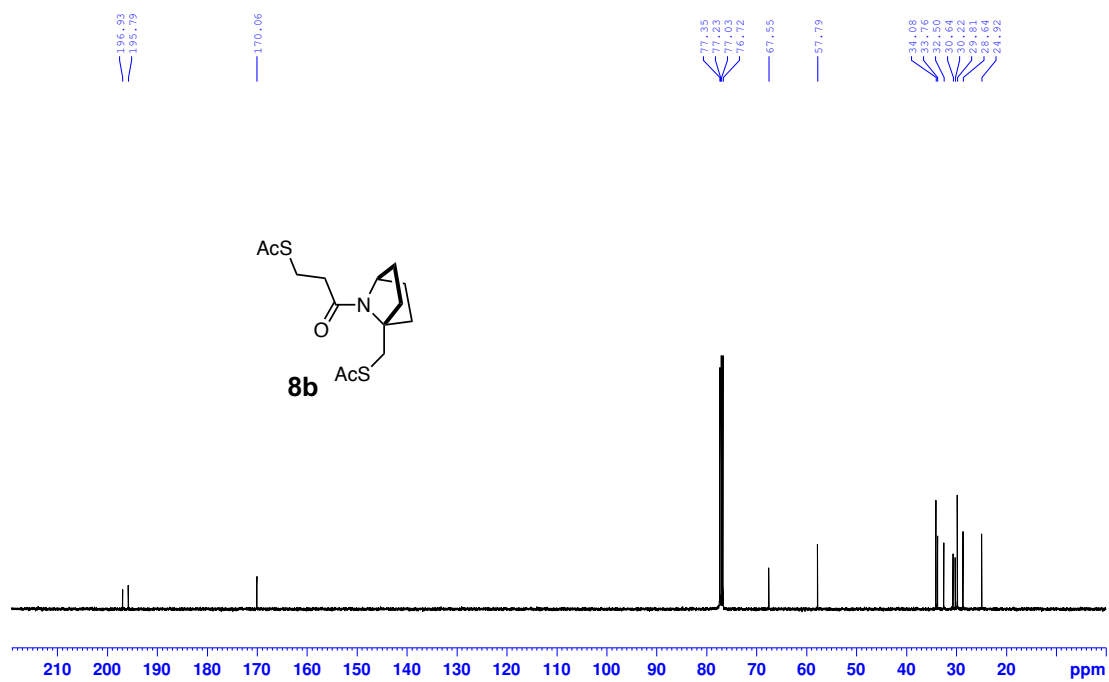

**Figure S56.** <sup>13</sup>C NMR spectrum of **8b** in CDCl<sub>3</sub>.

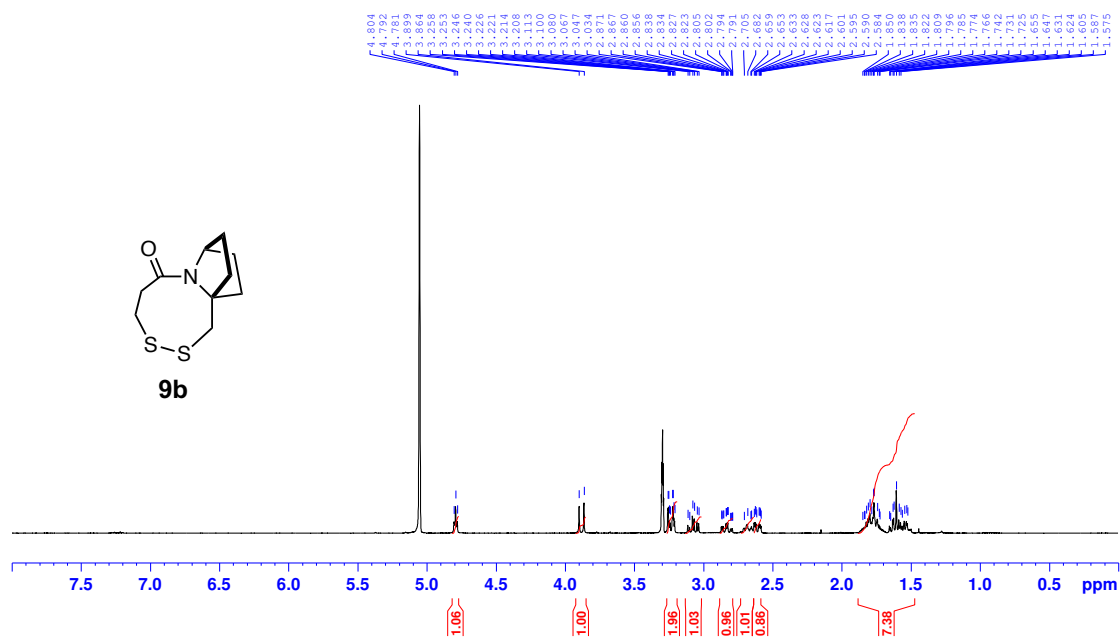

Figure S57. <sup>1</sup>H NMR spectrum of **21b** in MeOD at 274.4 K.

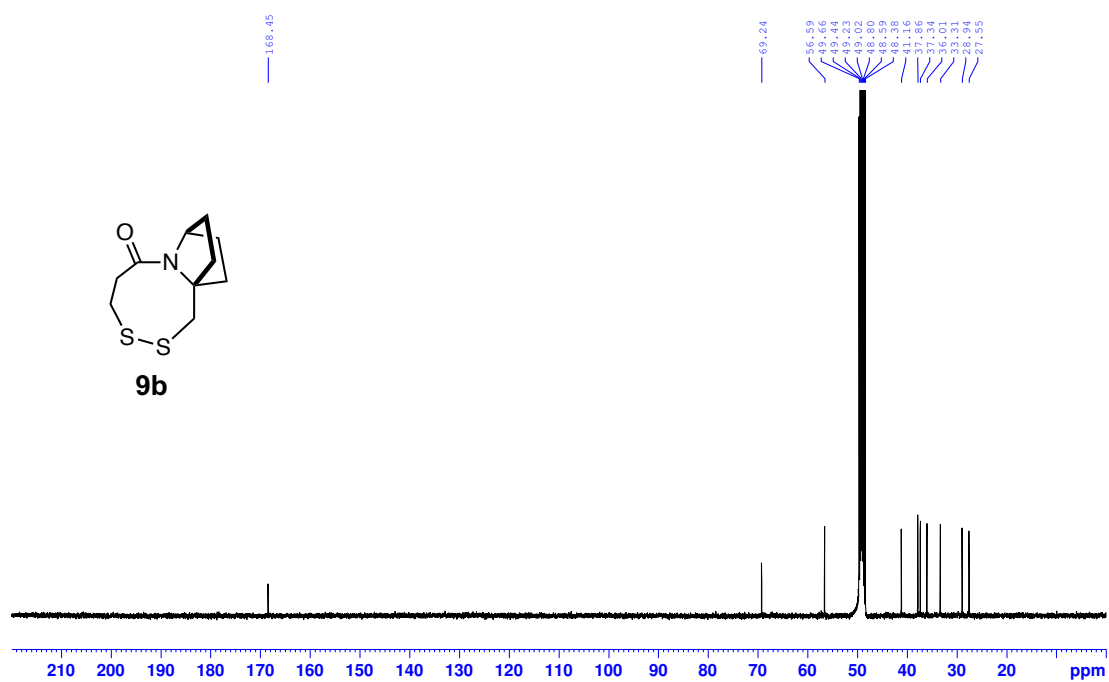

Figure S58. <sup>13</sup>C NMR spectrum of **9b** in MeOD at 274.4 K.

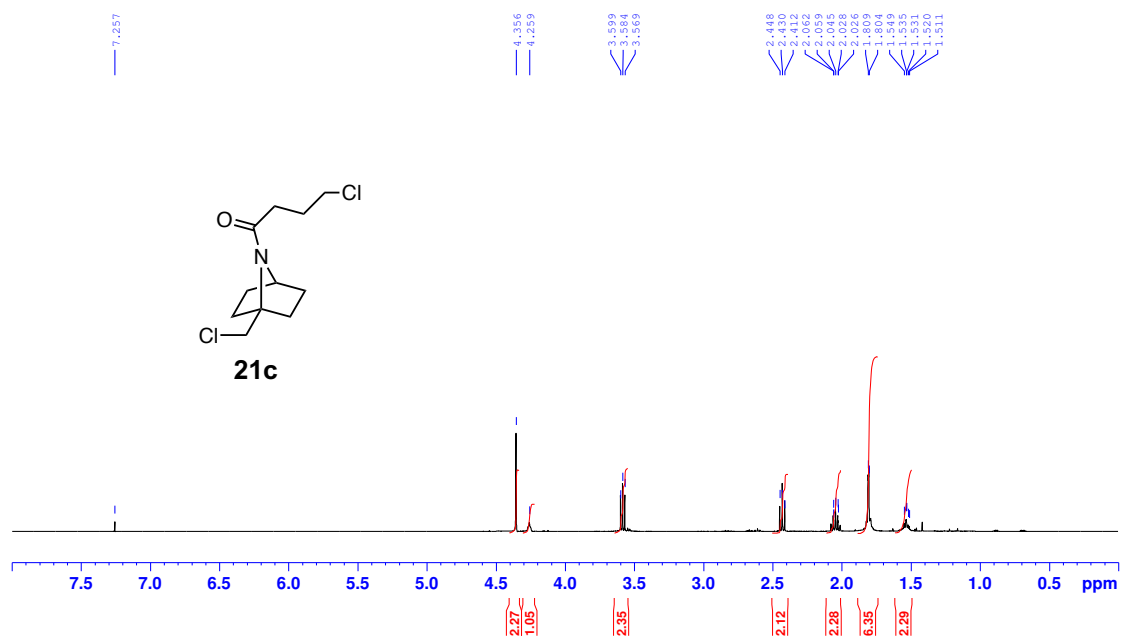

**Figure S59.**  $^1\text{H}$  NMR spectrum of **21c** in  $\text{CDCl}_3$ .

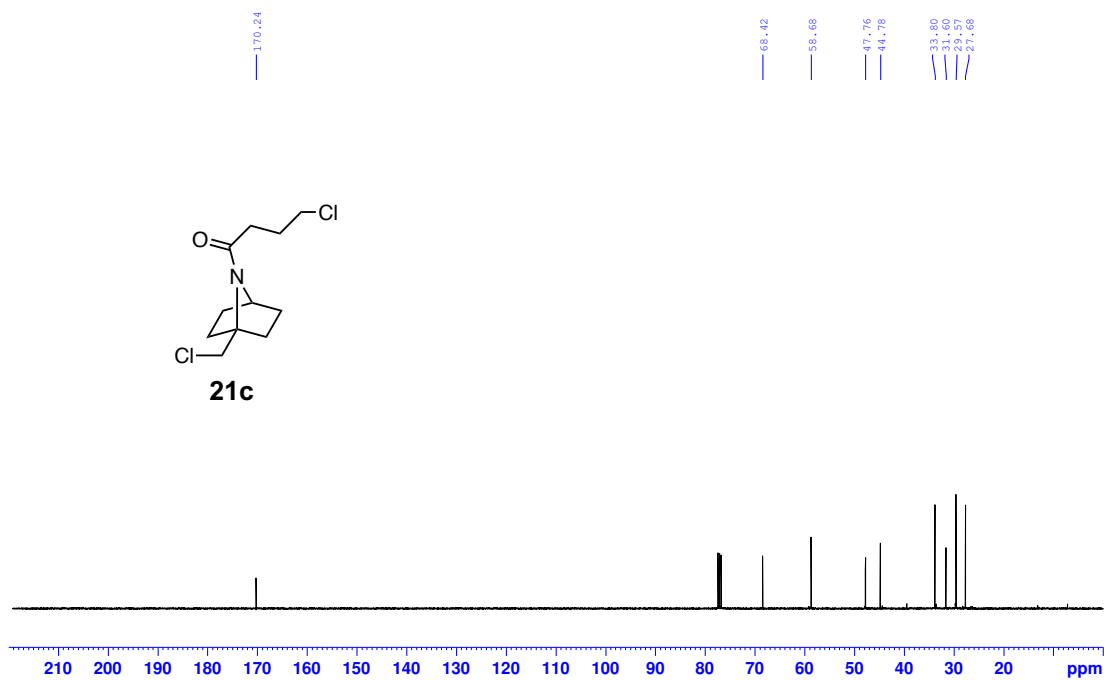

**Figure S60.**  $^{13}\text{C}$  NMR spectrum of **21c** in  $\text{CDCl}_3$ .

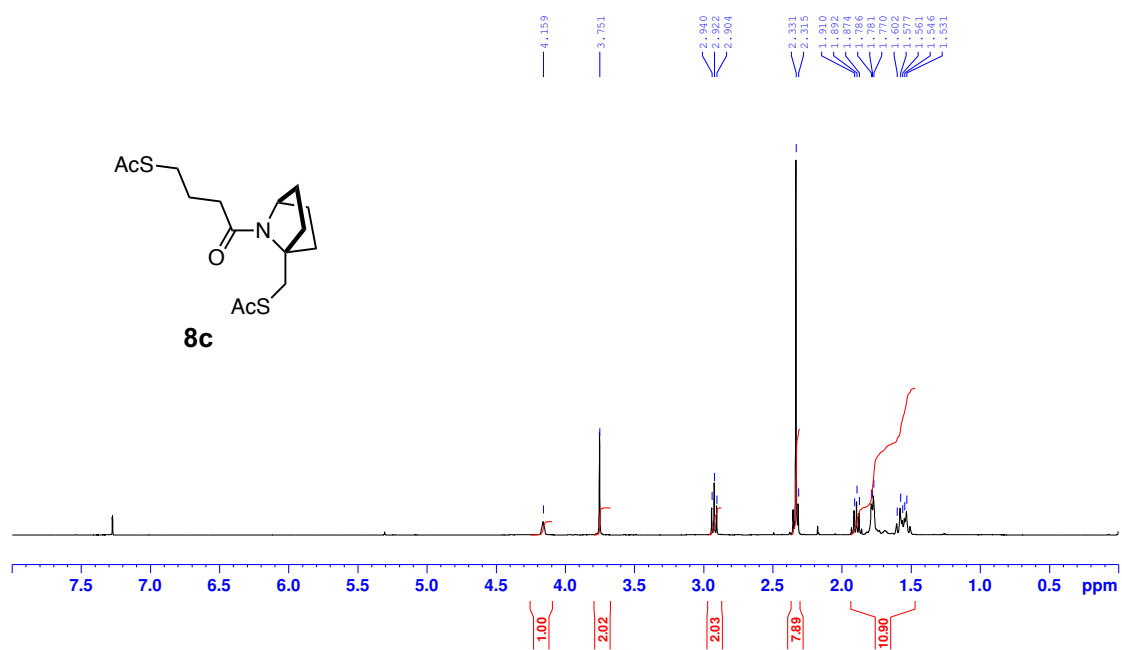

**Figure S61.** <sup>1</sup>H NMR spectrum of **8c** in CDCl<sub>3</sub>.

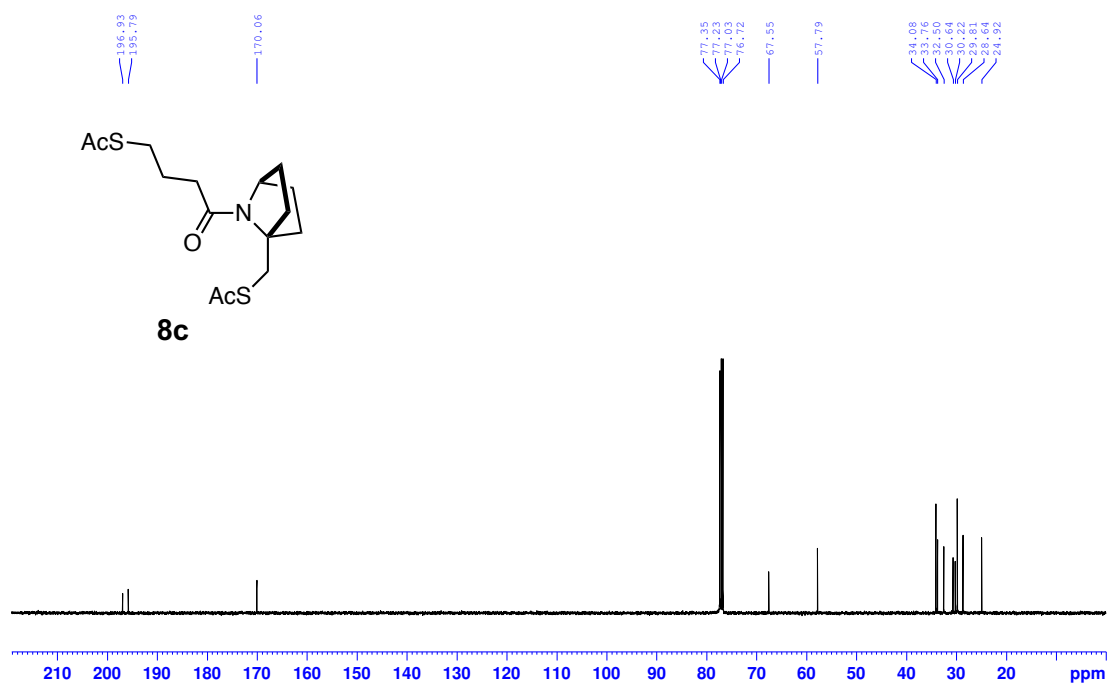

**Figure S62.** <sup>13</sup>C NMR spectrum of **8c** in CDCl<sub>3</sub>.

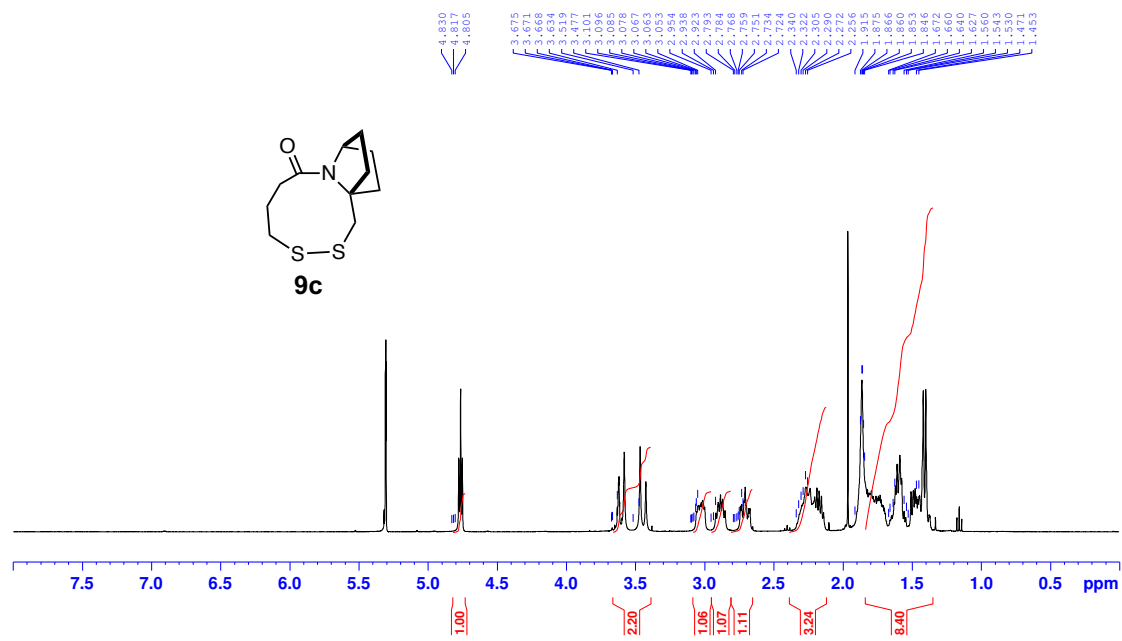

**Figure S63.** <sup>1</sup>H NMR spectrum of **9c** in CD<sub>2</sub>Cl<sub>2</sub> at 274.6 K.

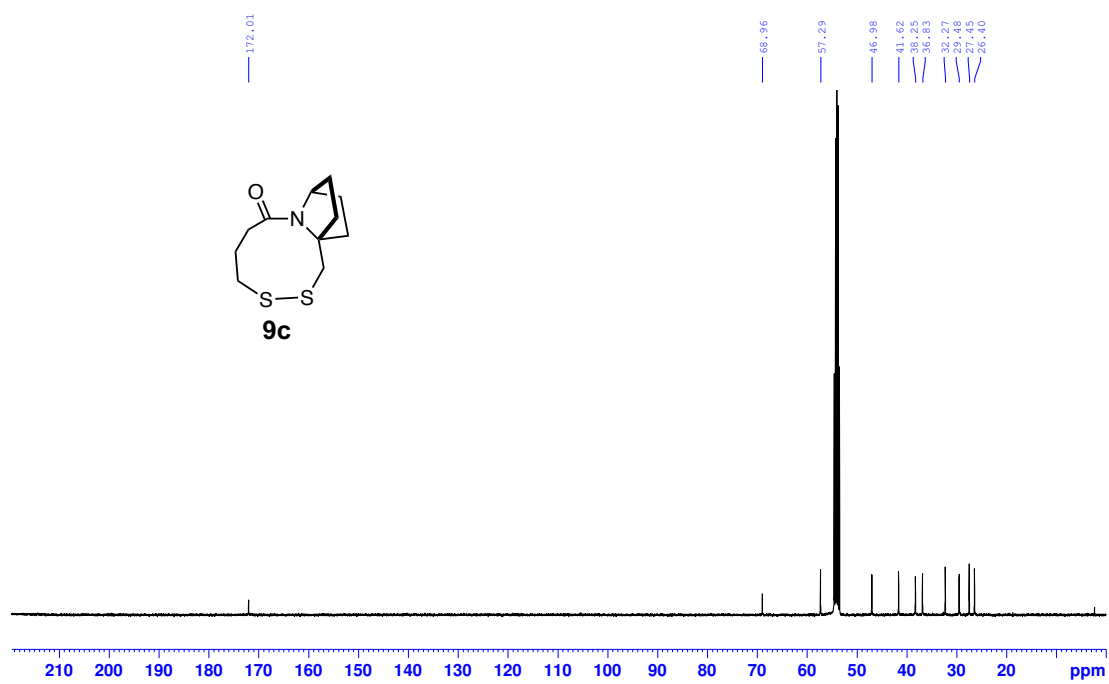

**Figure S64.** <sup>13</sup>C NMR spectrum of **9c** in CD<sub>2</sub>Cl<sub>2</sub> at 274.6 K.

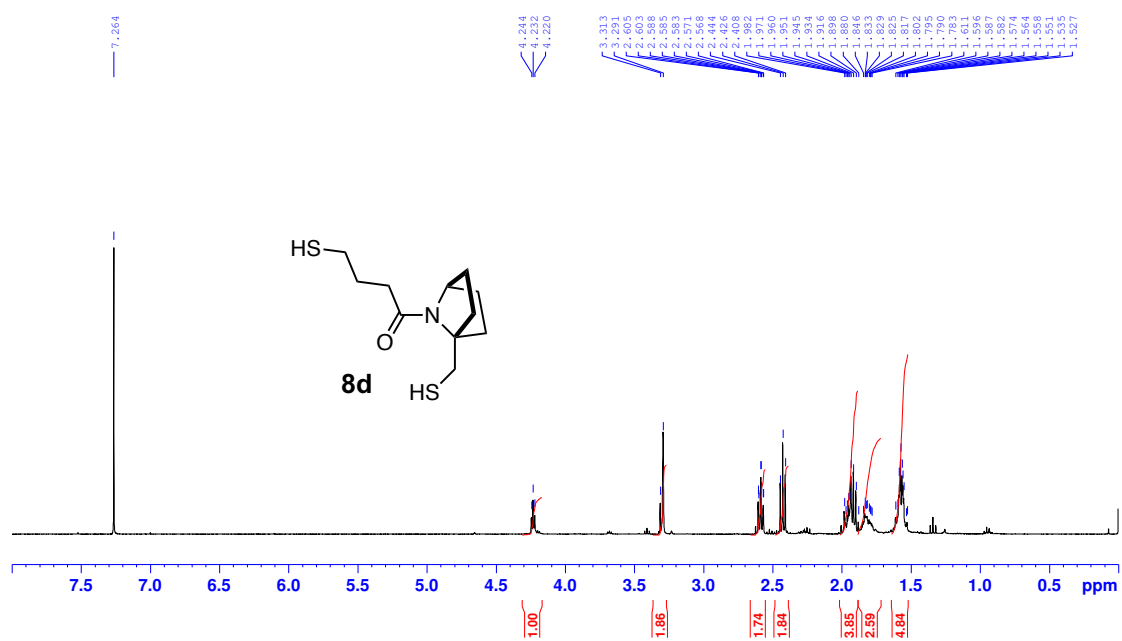

**Figure S65.** <sup>1</sup>H NMR spectrum of **8d** in CDCl<sub>3</sub>.

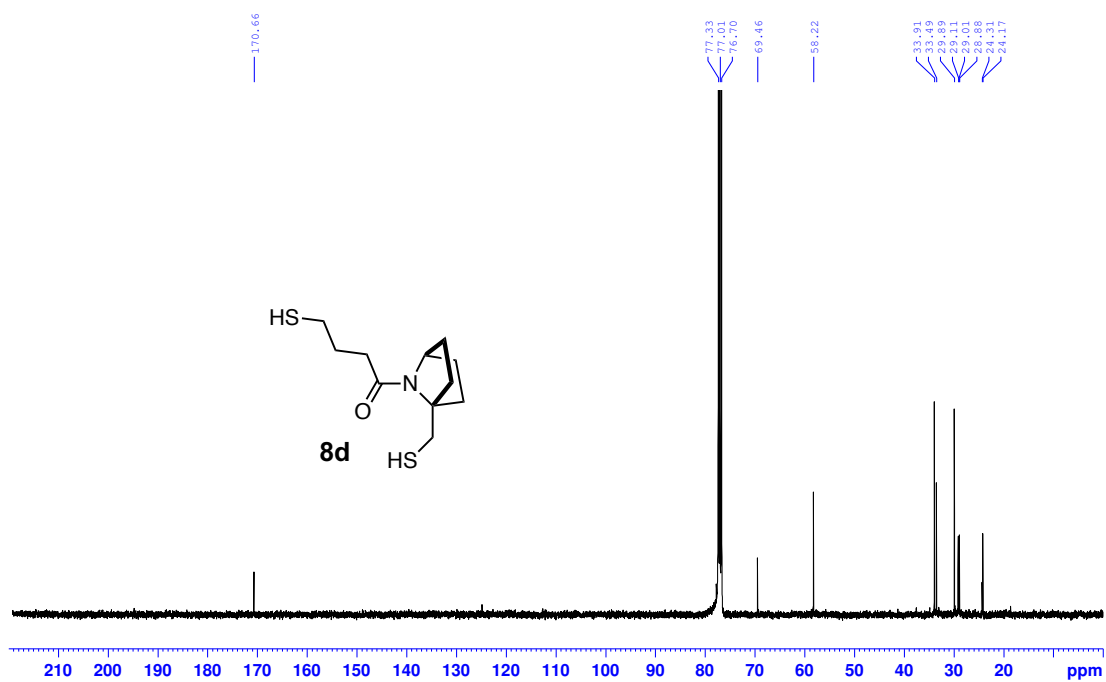

**Figure S66.** <sup>13</sup>C NMR spectrum of **8d** in CDCl<sub>3</sub>.

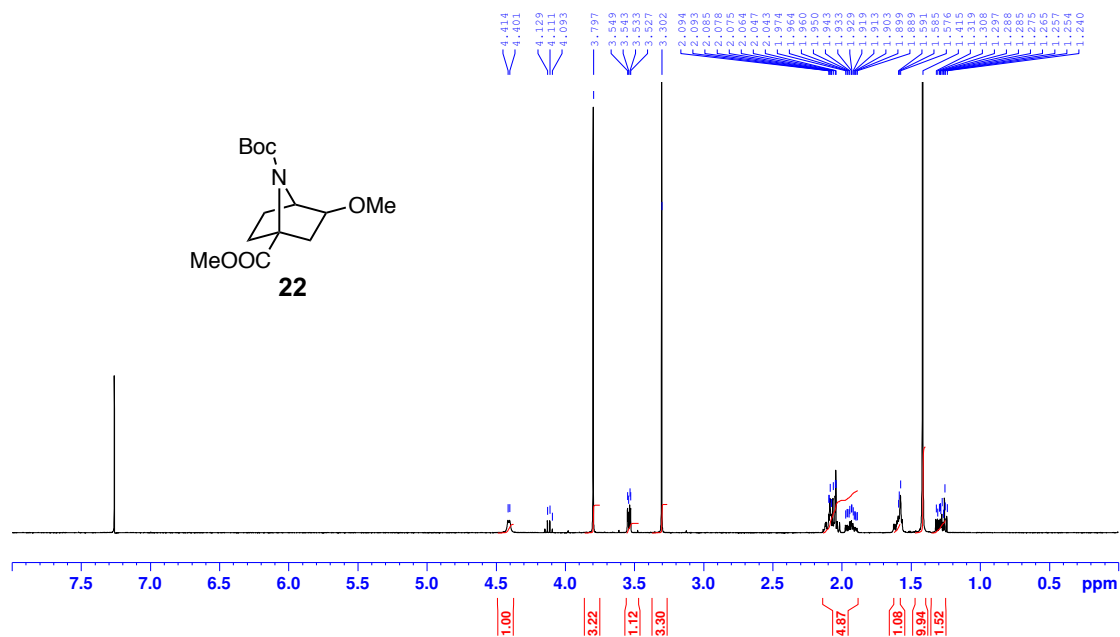

**Figure S67.**  $^1\text{H}$  NMR spectrum of **22** in  $\text{CDCl}_3$ .

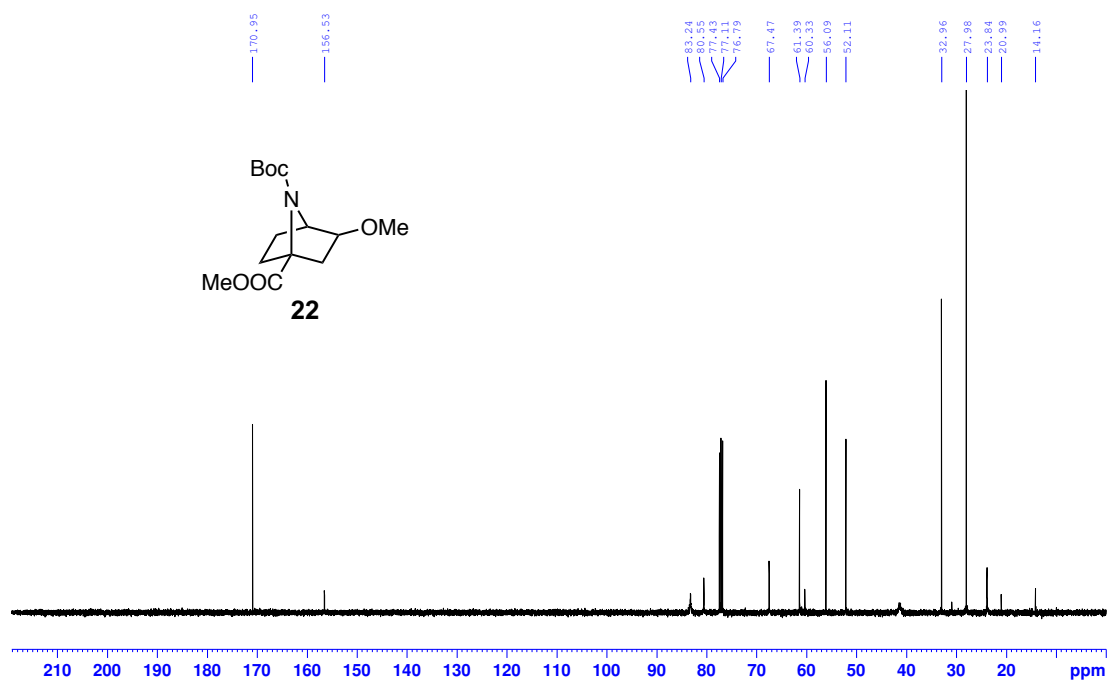

**Figure S68.**  $^{13}\text{C}$  NMR spectrum of **22** in  $\text{CDCl}_3$ .

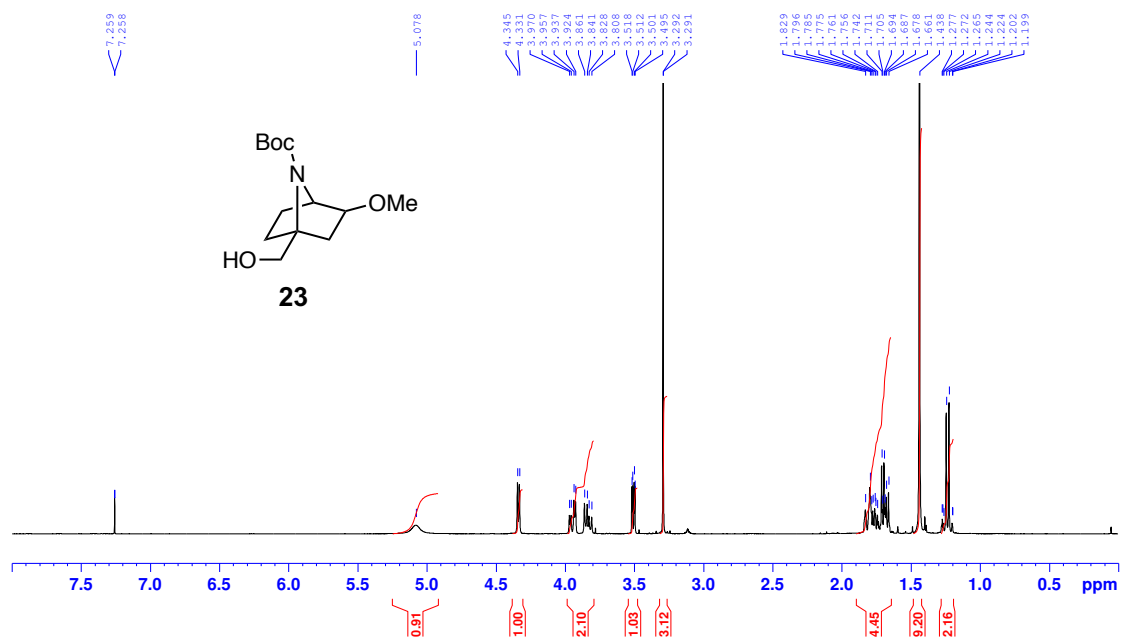

**Figure S69.** <sup>1</sup>H NMR spectrum of **23** in CDCl<sub>3</sub>.

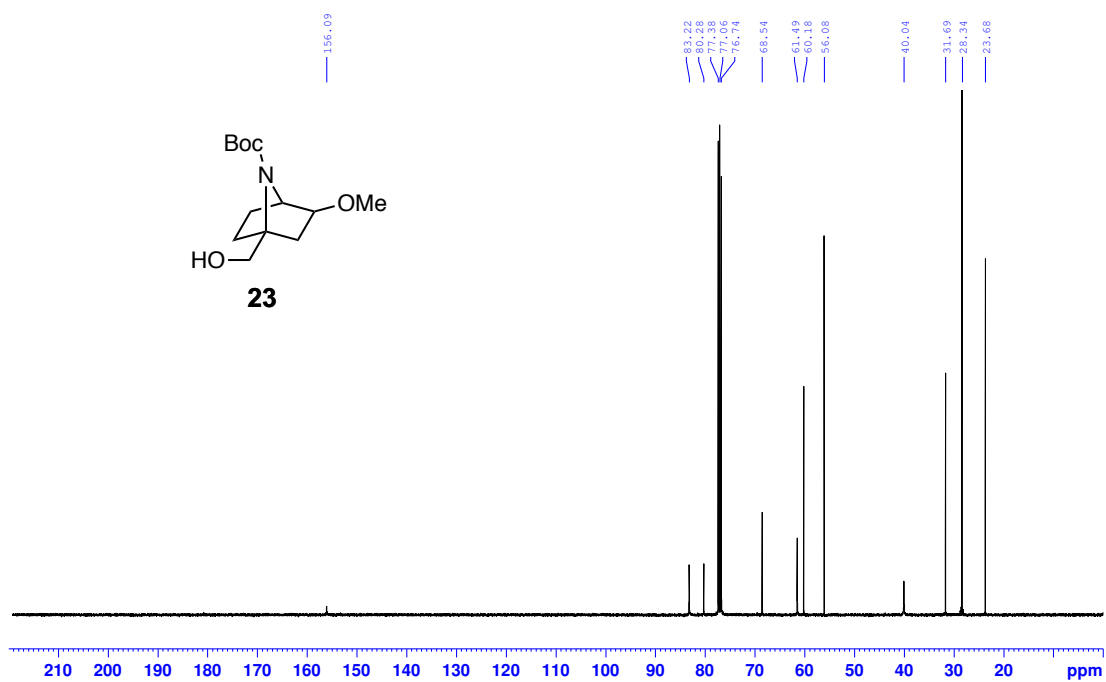

**Figure S70.** <sup>13</sup>C NMR spectrum of **23** in CDCl<sub>3</sub>.



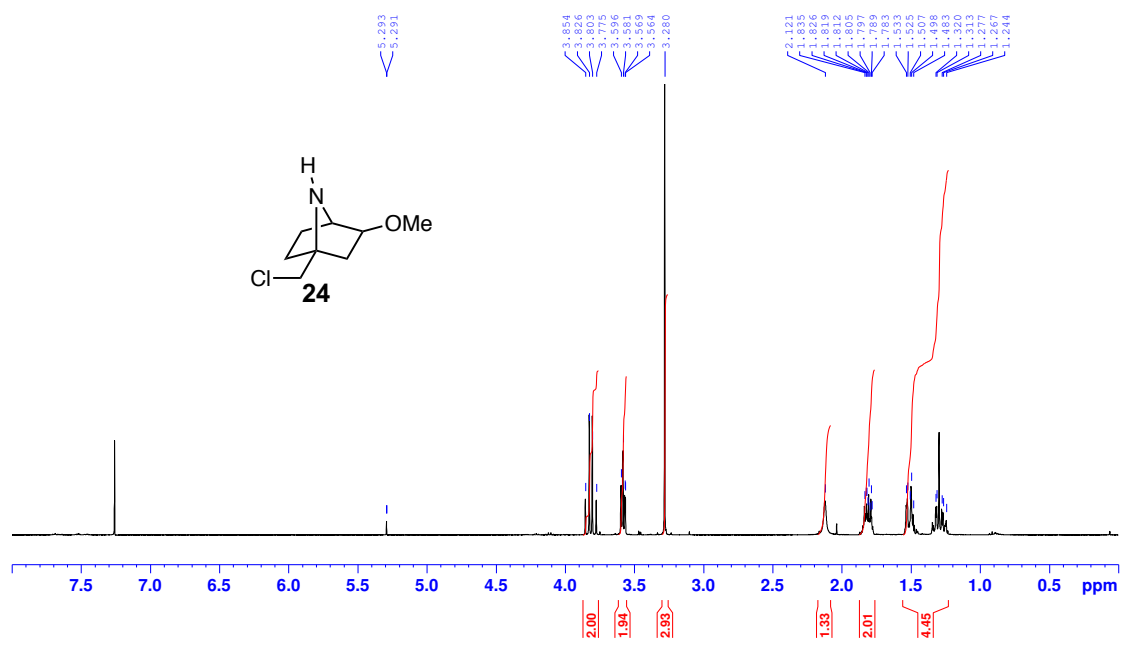

**Figure S71.** <sup>1</sup>H NMR spectrum of **24** in CDCl<sub>3</sub>.

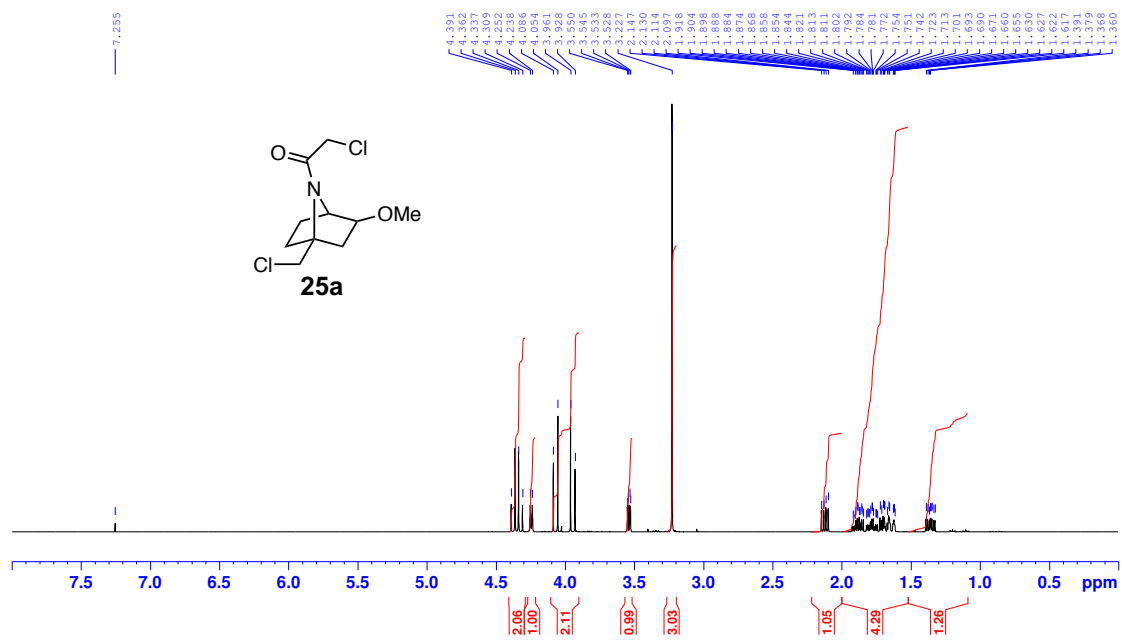

**Figure S72.** <sup>1</sup>H NMR spectrum of **25a** in CDCl<sub>3</sub>.

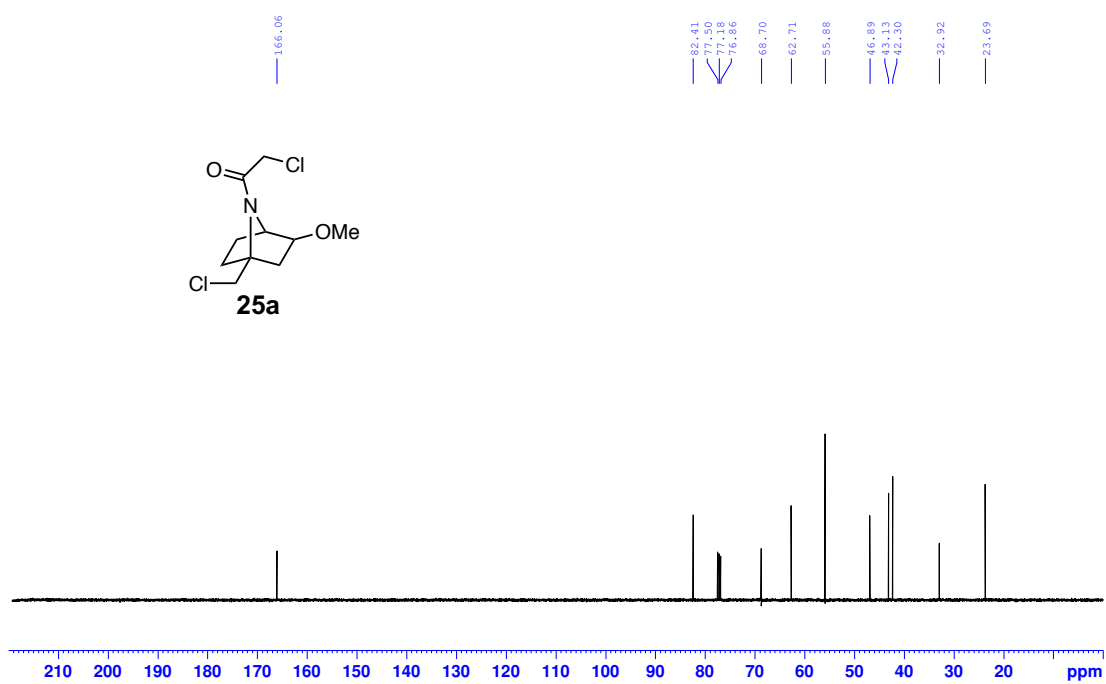

**Figure S73.** <sup>13</sup>C NMR spectrum of **25a** in CDCl<sub>3</sub>.

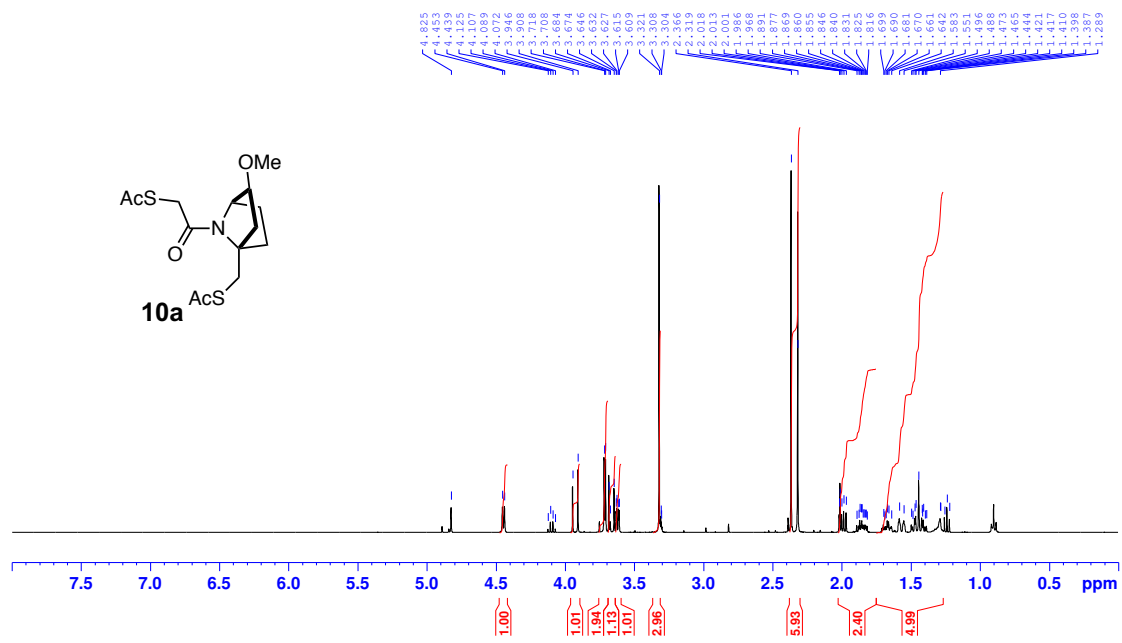

**Figure S74.** <sup>1</sup>H NMR spectrum of **10a** in MeOD.

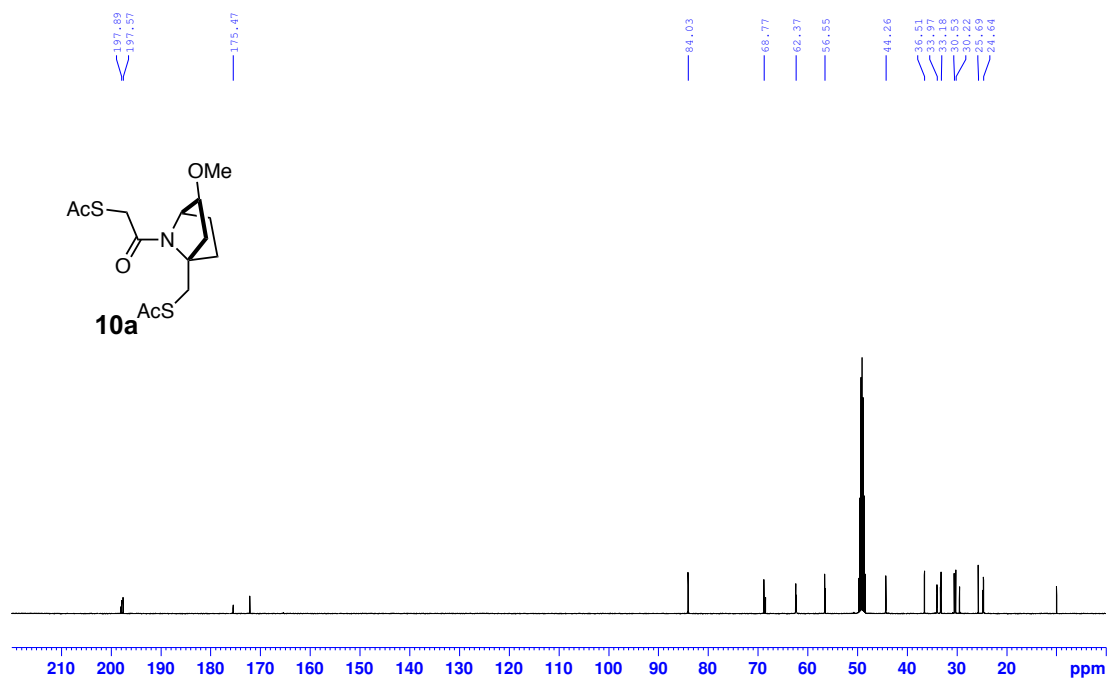

**Figure S75.** <sup>13</sup>C NMR spectrum of **10a** in MeOD.

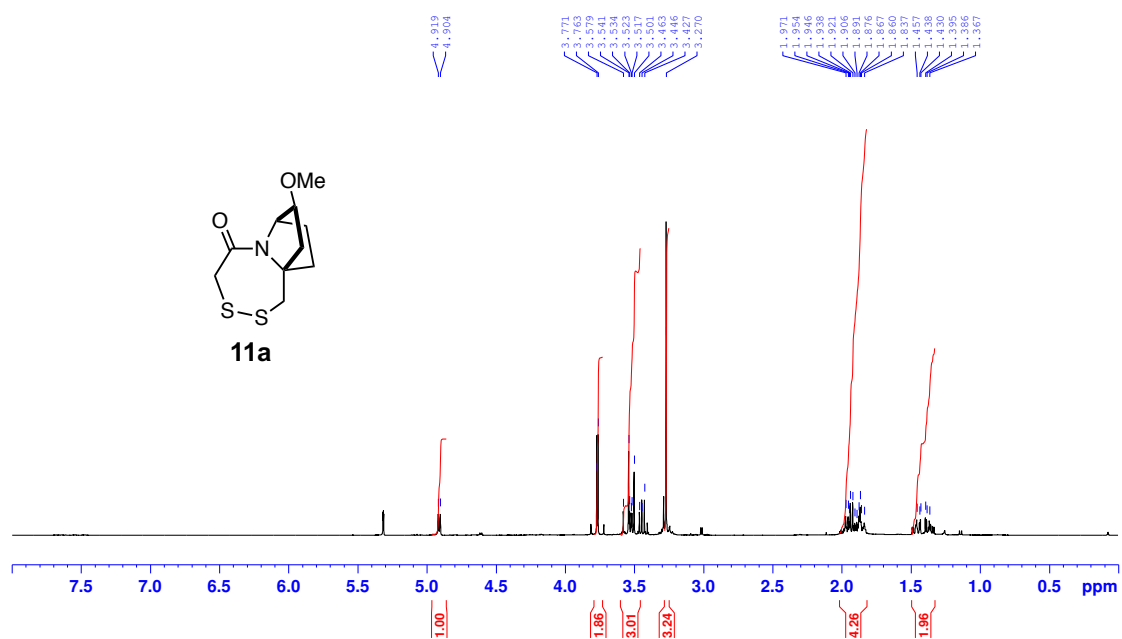

**Figure S76.** <sup>1</sup>H NMR spectrum of **11a** in CD<sub>2</sub>Cl<sub>2</sub>.

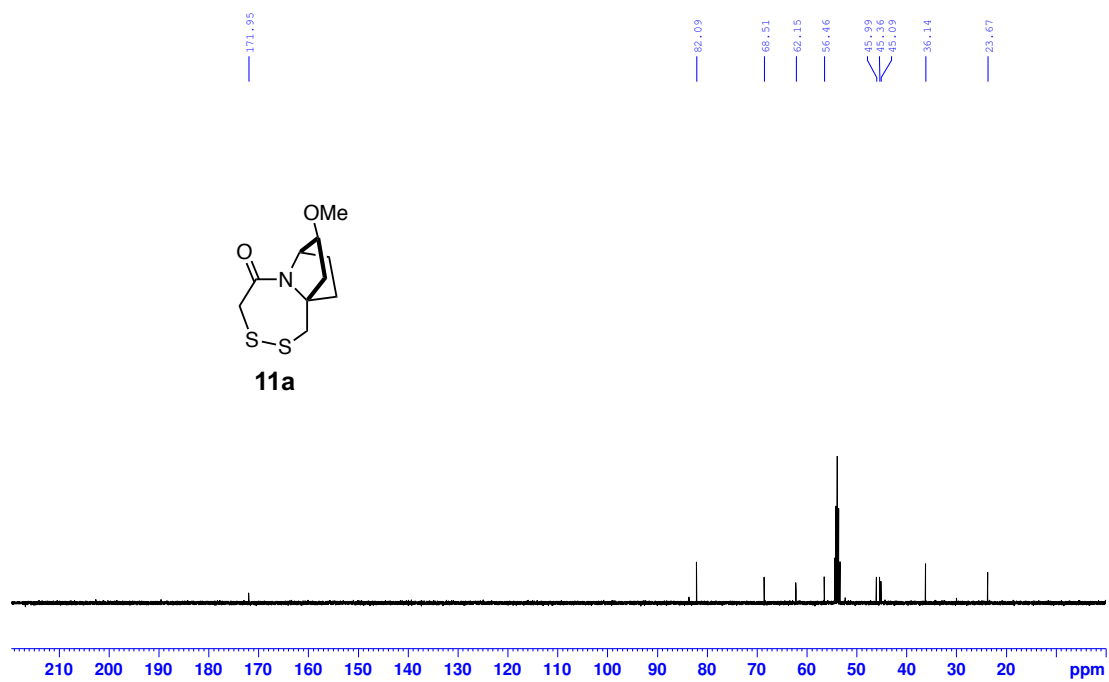

**Figure S77.** <sup>13</sup>C NMR spectrum of **11a** in CD<sub>2</sub>Cl<sub>2</sub>.

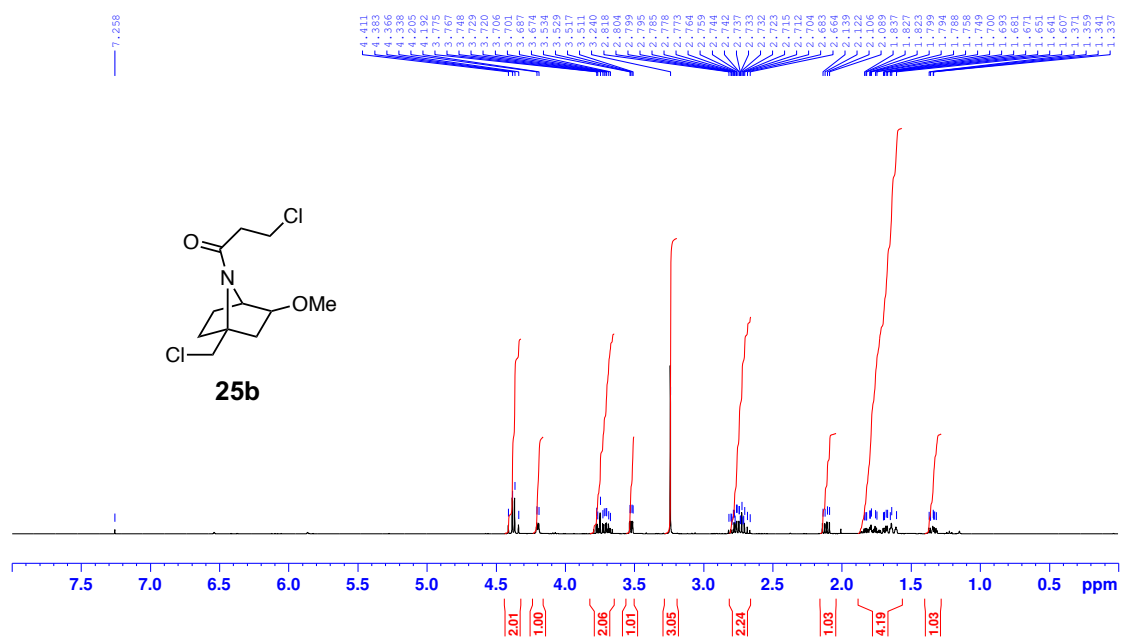

**Figure S78.** <sup>1</sup>H NMR spectrum of **25b** in CDCl<sub>3</sub>.

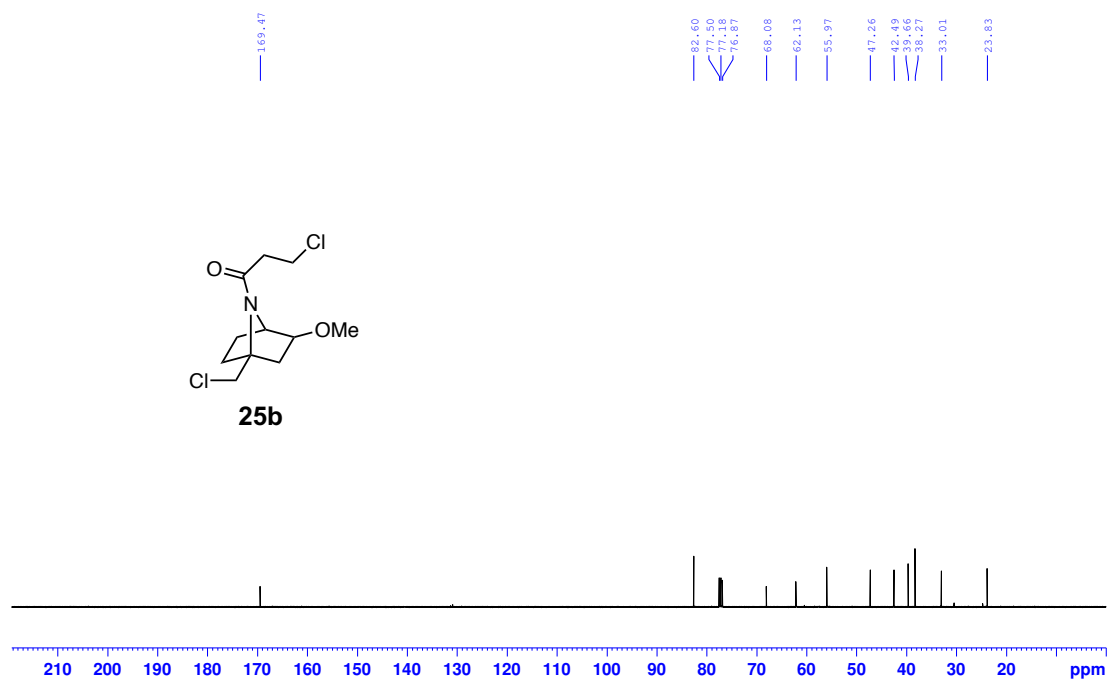

**Figure S79.** <sup>13</sup>C NMR spectrum of **25b** in CDCl<sub>3</sub>.



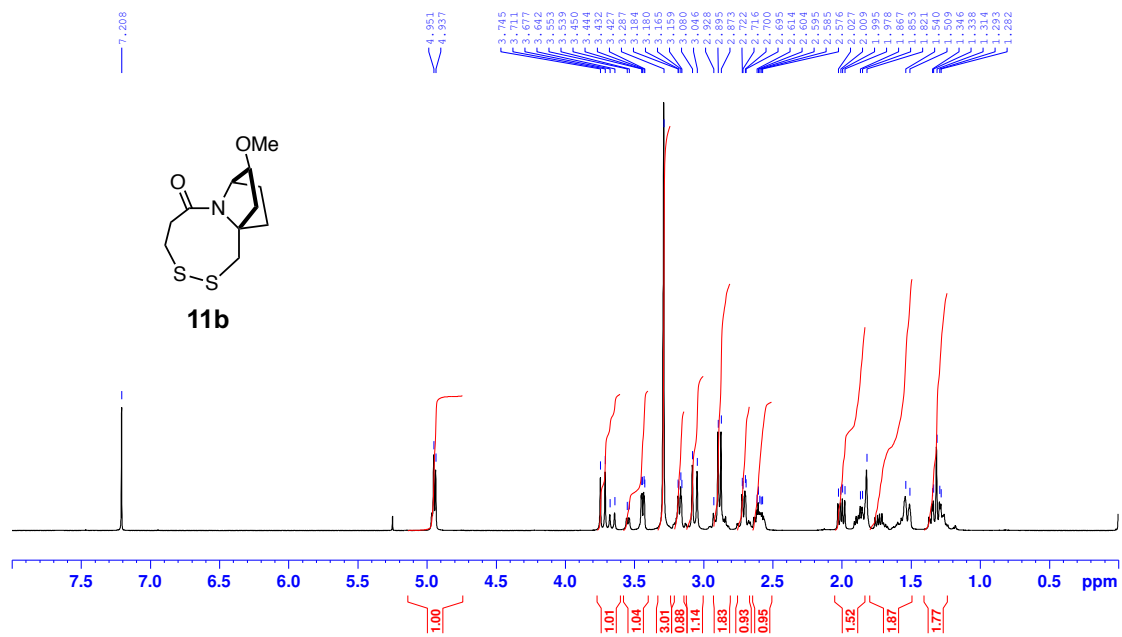

**Figure S82.** <sup>1</sup>H NMR spectrum of **11b** in CDCl<sub>3</sub> at 274.6 K.

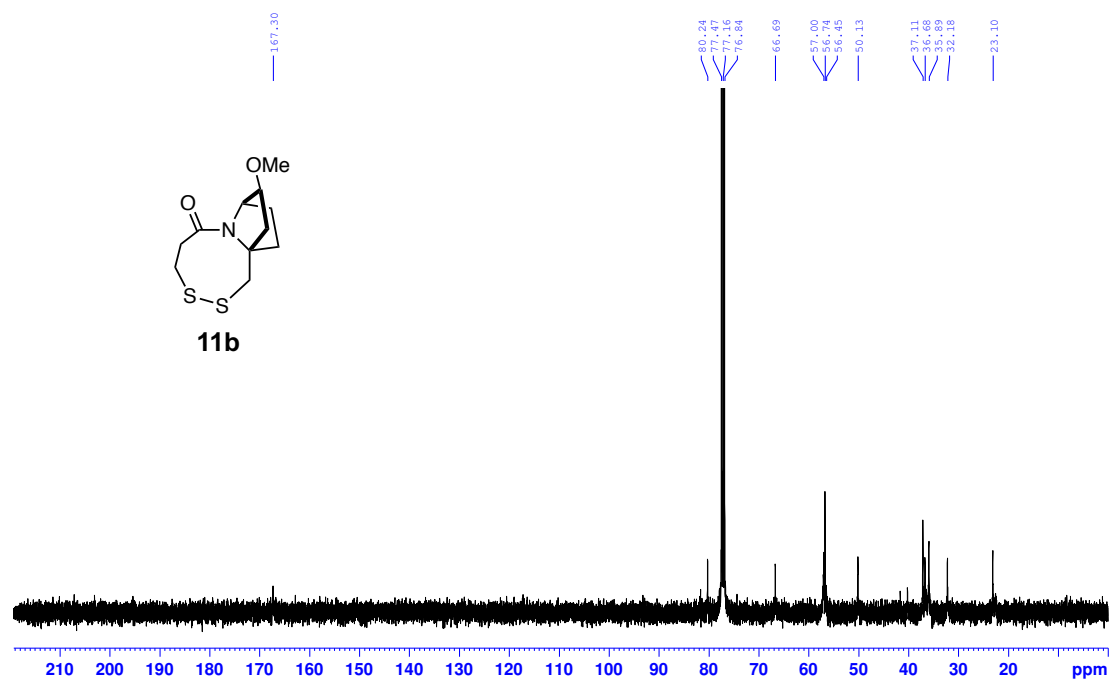

**Figure S83.** <sup>13</sup>C NMR spectrum of **11b** in CDCl<sub>3</sub> at 274.6 K.

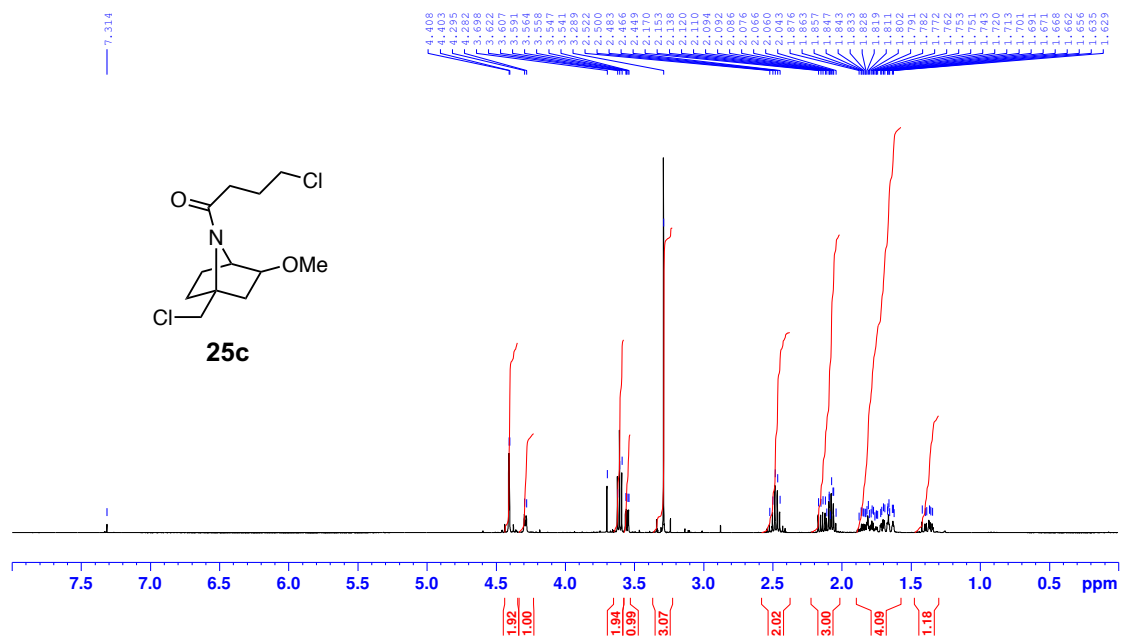

**Figure S84.**  $^1\text{H}$  NMR spectrum of **25c** in  $\text{CDCl}_3$ .



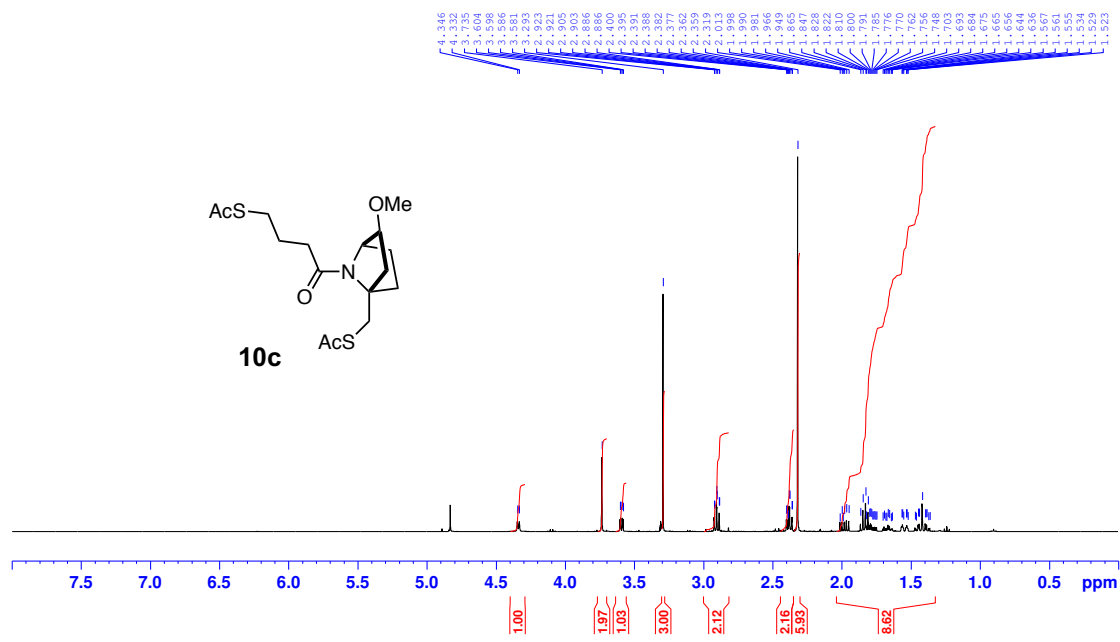

Figure S85. <sup>1</sup>H NMR spectrum of **10c** in MeOD.

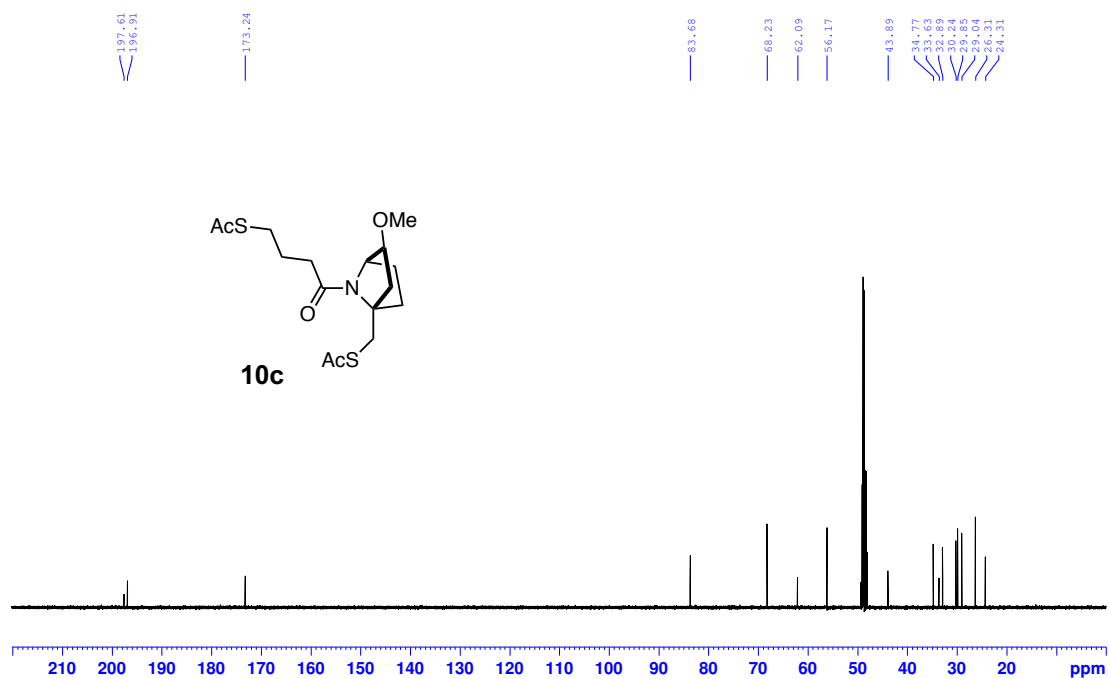

Figure S86. <sup>13</sup>C NMR spectrum of **10c** in MeOD.

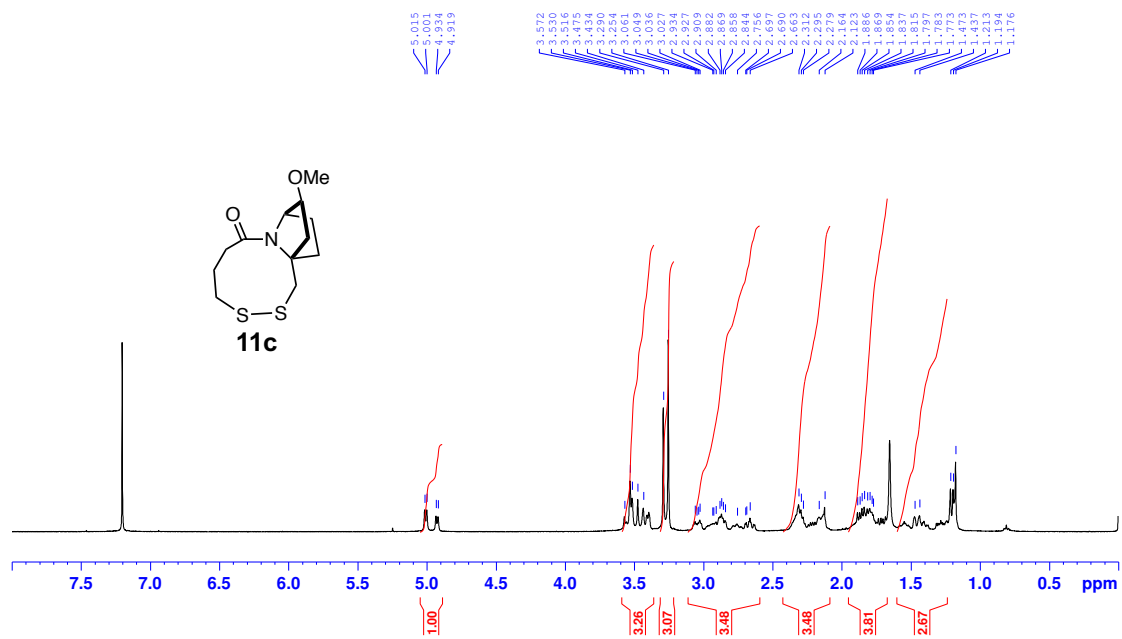

**Figure S87.**  $^1\text{H}$  NMR spectrum of **11c** in  $\text{CDCl}_3$  at 274.6K.

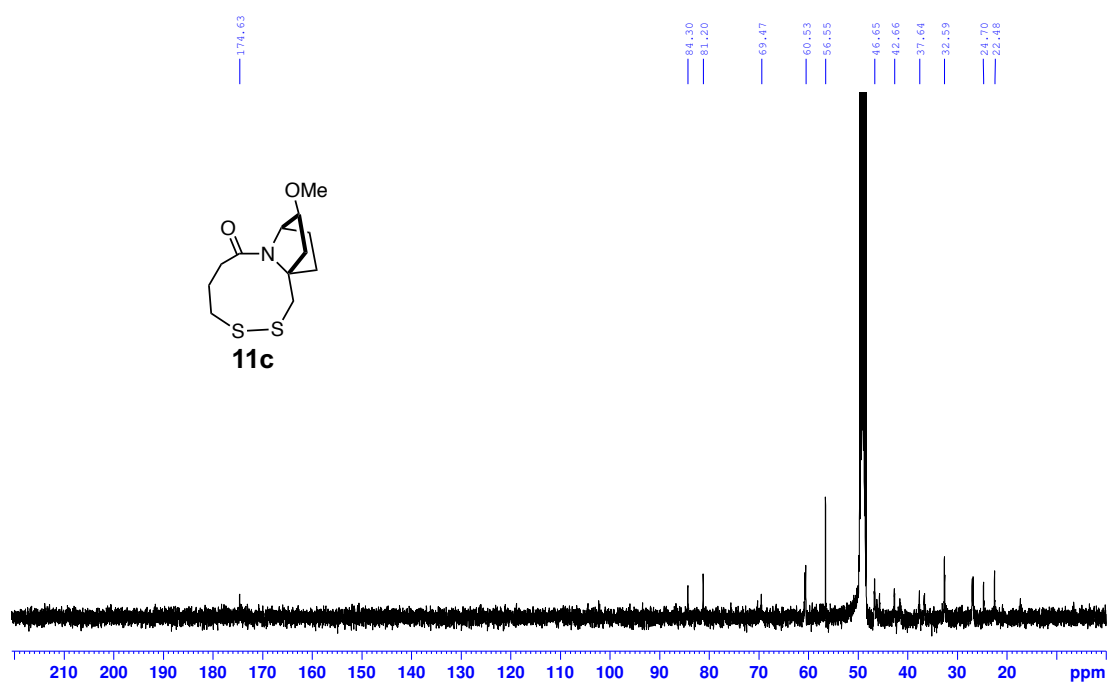

**Figure S88.**  $^{13}\text{C}$  NMR spectrum of **11c** in MeOD.

#### 4. HPLC Charts

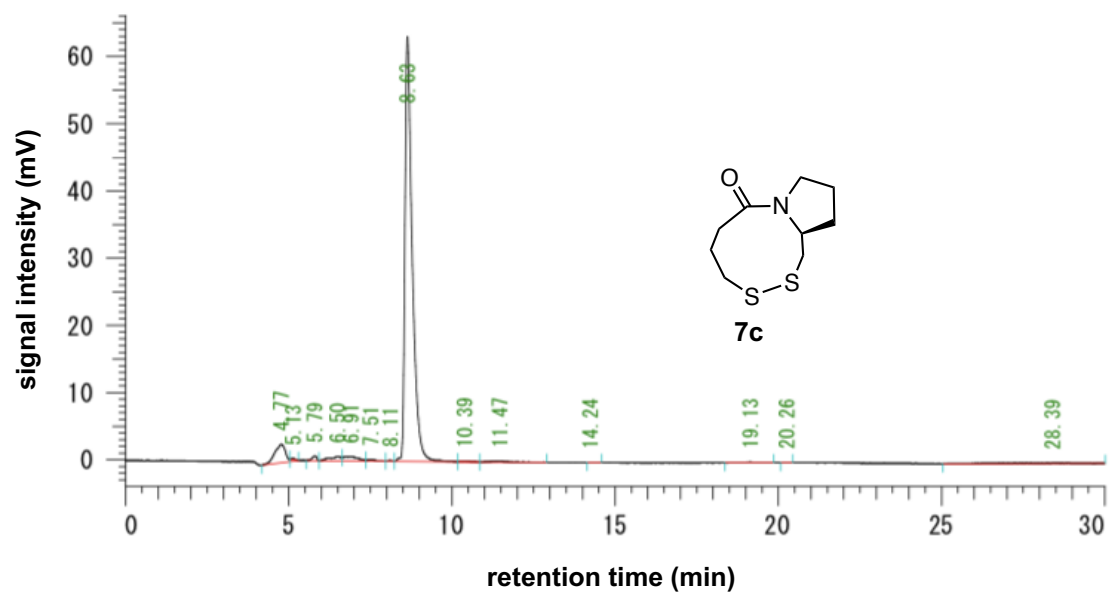

Figure S89. HPLC chart of **7c**.

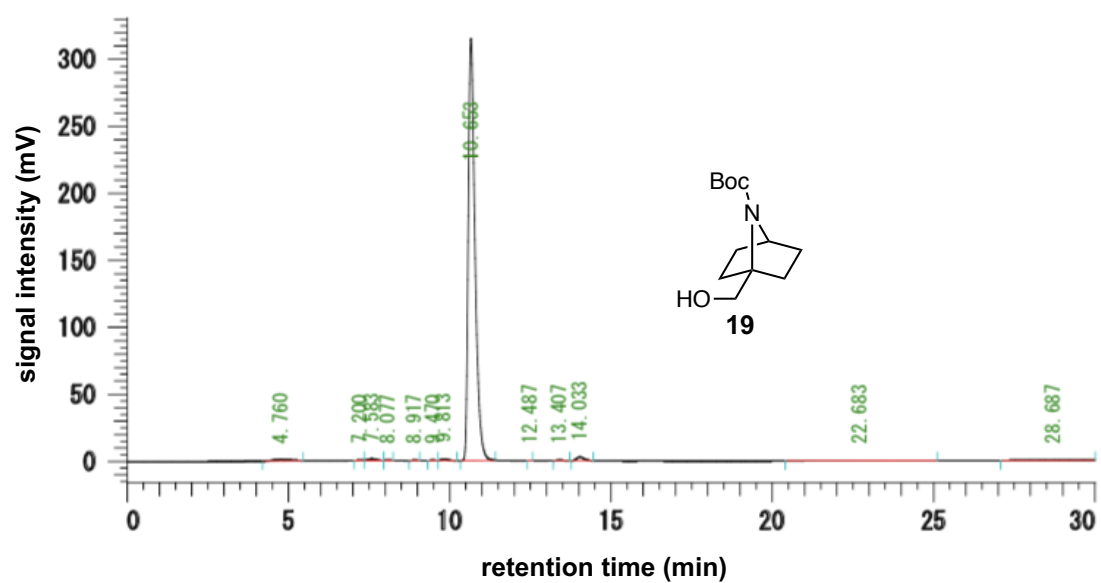

Figure S90. HPLC chart of **19**.

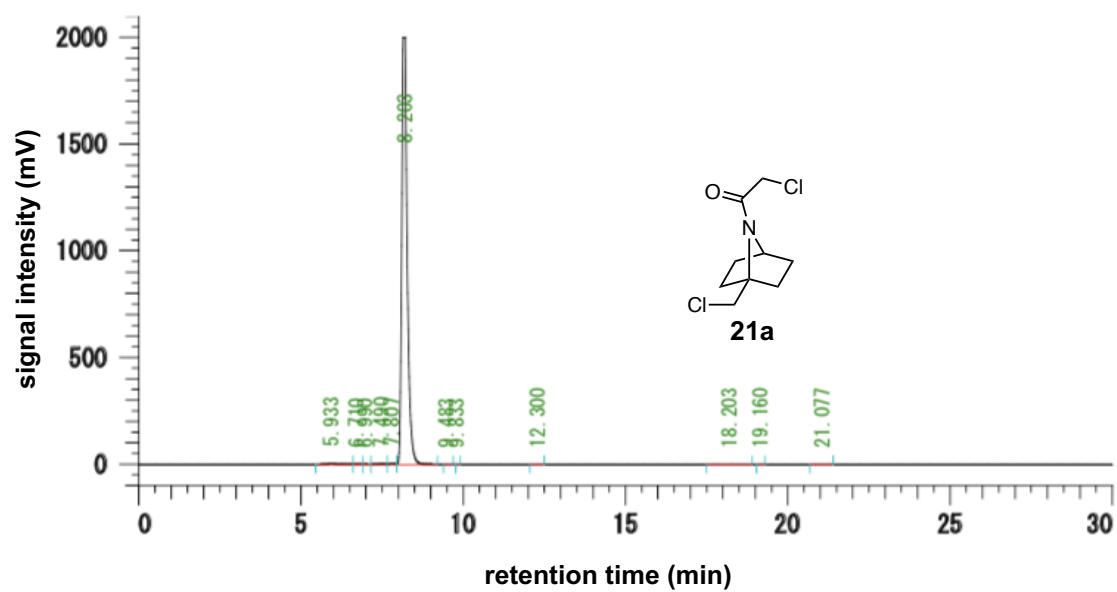

Figure S91. HPLC chart of **21a**.

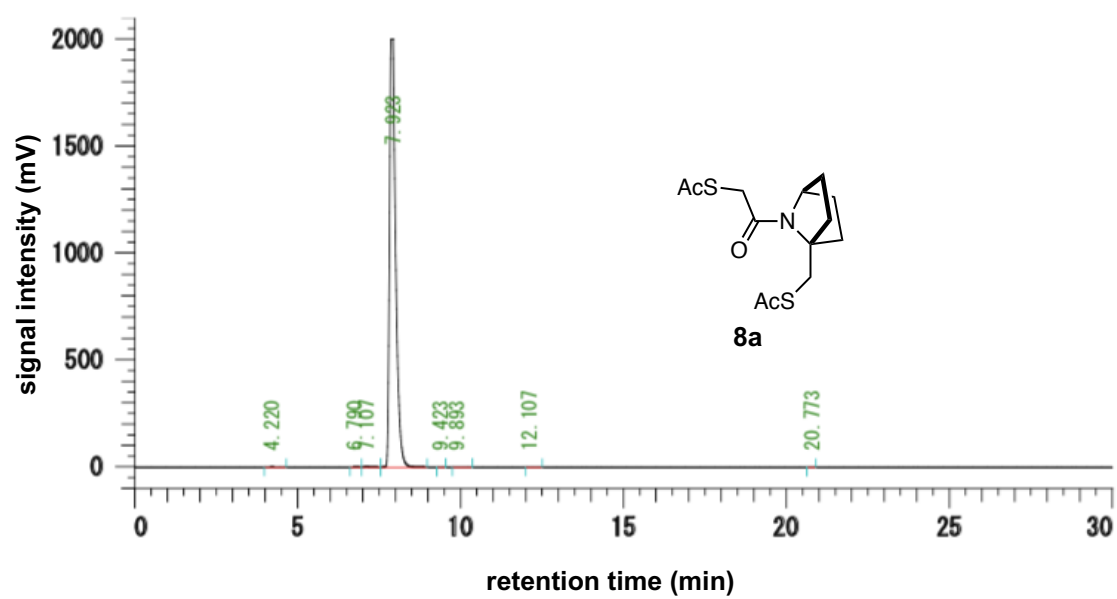

Figure S92. HPLC chart of **8a**.

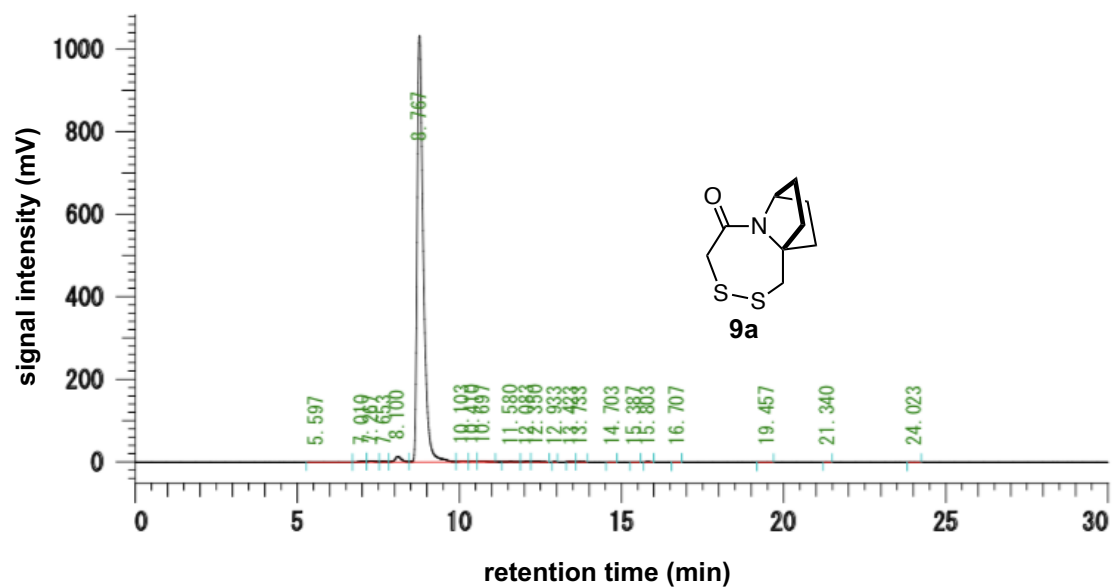

Figure S93. HPLC chart of **9a**.

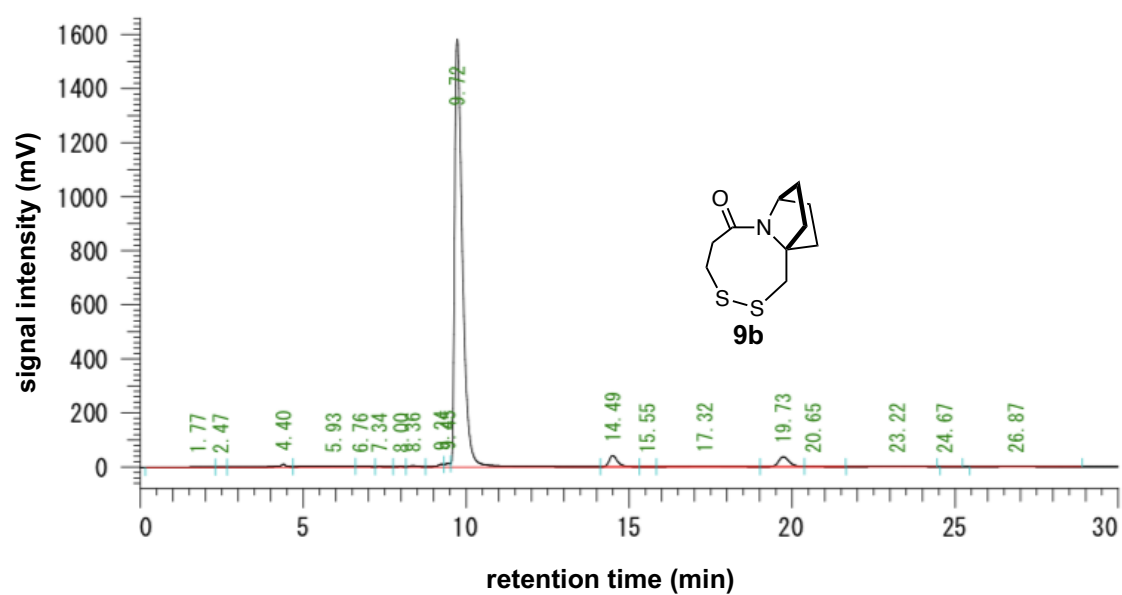

Figure S94. HPLC chart of **9b**.

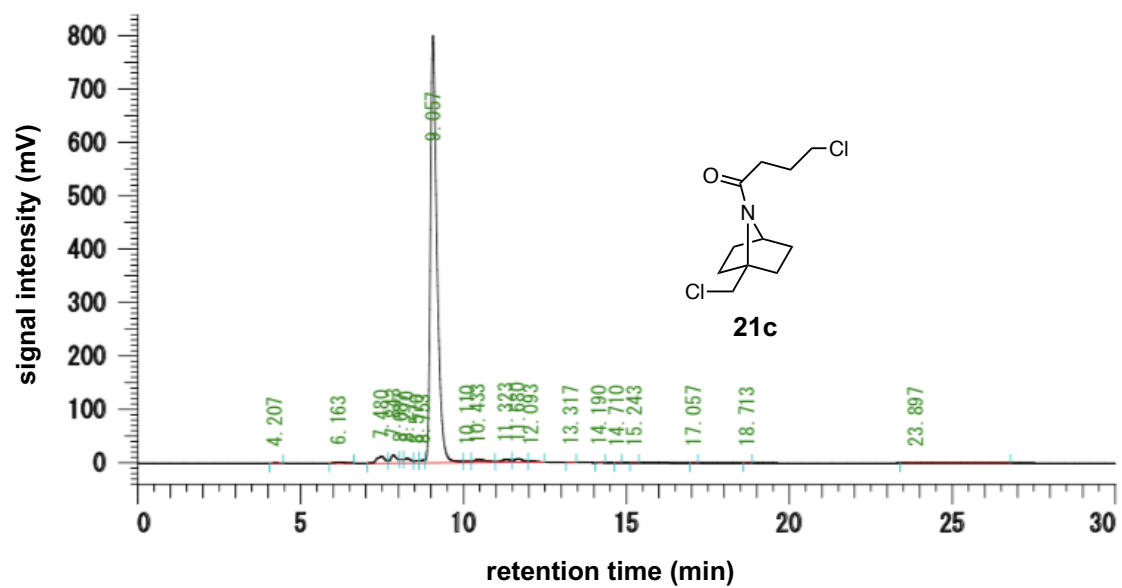

Figure S95. HPLC chart of **21c**.

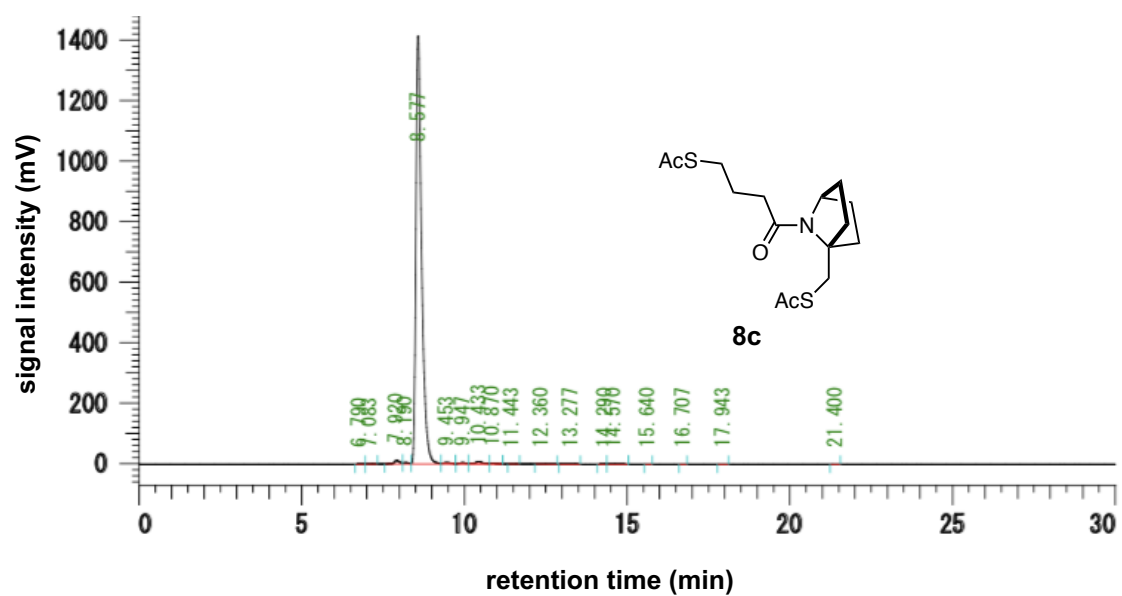

Figure S96. HPLC chart of **8c**.

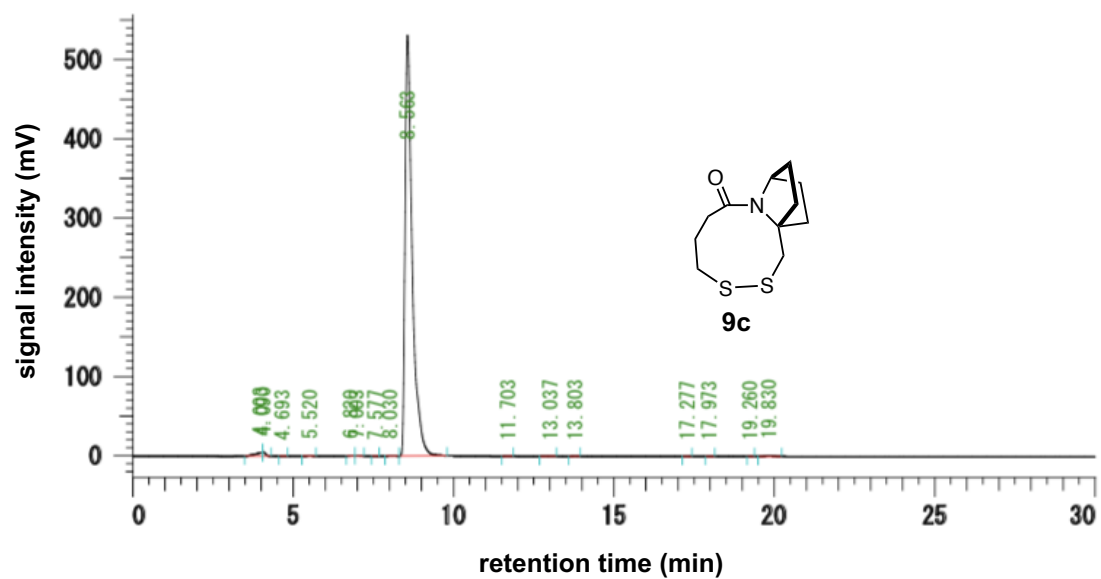

Figure S97. HPLC chart of **9c**.

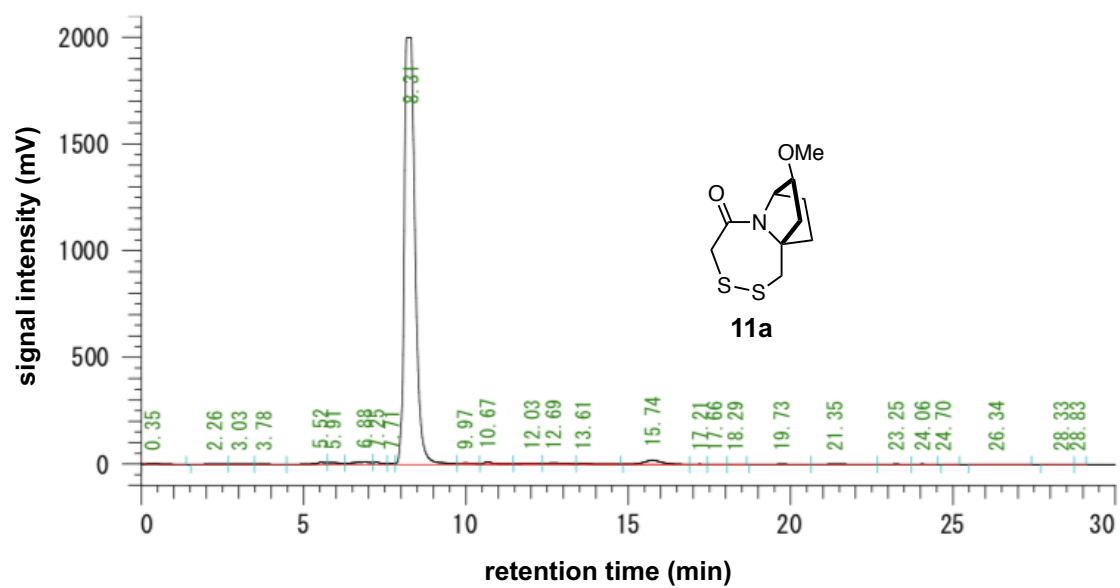

Figure S98. HPLC chart of **11a**.

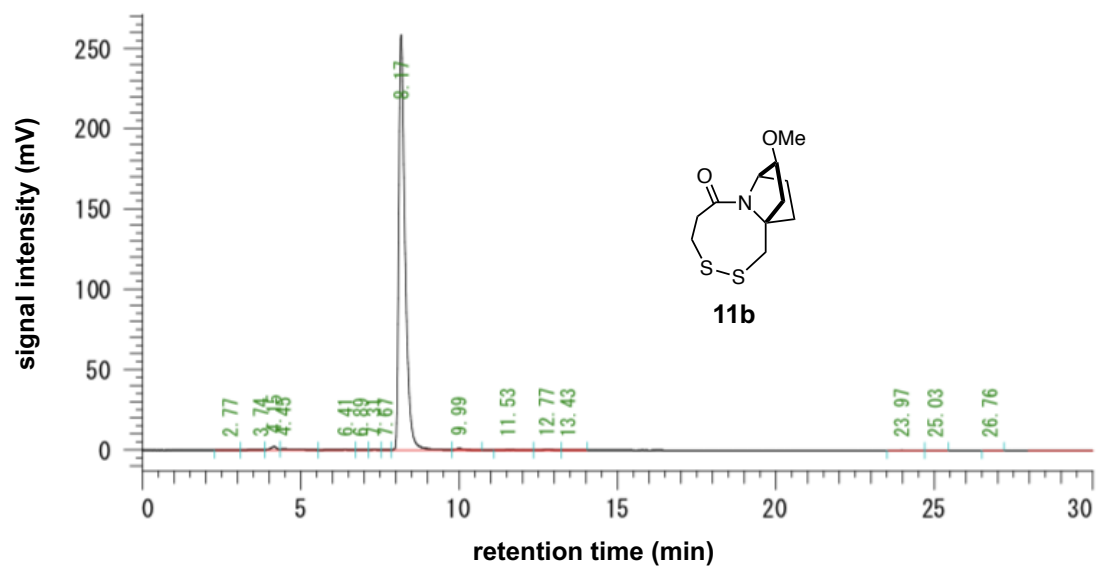

Figure S99. HPLC chart of **11b**.

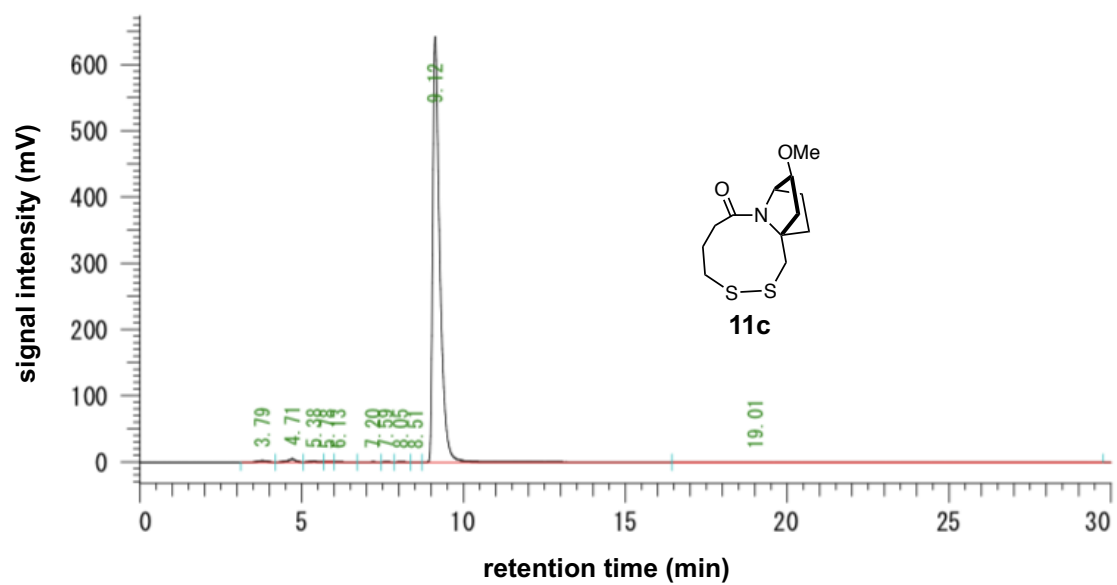

Figure S100. HPLC chart of **11c**.



## 5. Computational Study

### Metadynamics Simulations

Metadynamics calculations were performed with Desmond using the OPAL3e force field (Schrodinger Inc., U.S.A.). The simulation conditions are as follows:

Temperature = 300.0 K, Pressure = 1.01325 bar, Ensemble = NPT, Solvent = CHCl<sub>3</sub>, Simulation time = 20 ns.

### DFT calculation

The energy minimum structures and transition state (TS) structures of isomerization were fully optimized at the APFD/6-311+G(2d,p) level using the Gaussian 16 program.<sup>[S4]</sup> Bulk solvation effects (self-consistent reaction field, SCRf) were simulated in chloroform by the IEFPCM method (SCRf = IEFPCM, solvent = CHCl<sub>3</sub>). Harmonic frequency calculations characterized the optimized structures. Intrinsic reaction coordinate (IRC) calculations of the transition structures verified reactants, intermediates, and products on the potential energy surface.

Optimized structures for conformers **a** – **d** in **9b** and conformers **a'** – **d'** in **11b** were obtained by further DFT optimization of the energy-minimum conformers obtained from metadynamics simulation. Transition state structures were predicted either by using the intermediate structures from the metadynamics simulations as initial structures or from scans of the dihedral angles  $\chi_3$  and  $\chi_{1'}$  of the energy minimum conformers.

### Calculated energies and coordinates

#### Conformer a

APFD/6-311+G(2d,p), SCRf = IEFPCM, solvent = CHCl<sub>3</sub>

Number of Imaginary Frequency = 0

Thermal Correction to Free Energy = 0.204645 Hartree

EE + Thermal Free Energy Correction = -1315.85 Hartree

| Center Number | Atomic Number | Atomic Type | Coordinates (Angstroms) |           |           |
|---------------|---------------|-------------|-------------------------|-----------|-----------|
|               |               |             | X                       | Y         | Z         |
| 1             | 6             | 0           | -2.174453               | 0.717690  | 0.513458  |
| 2             | 6             | 0           | -3.093331               | 0.037660  | -0.511610 |
| 3             | 6             | 0           | -2.163805               | -1.036320 | -1.127110 |
| 4             | 6             | 0           | -0.843973               | -0.847064 | -0.340681 |

|    |    |   |           |           |           |
|----|----|---|-----------|-----------|-----------|
| 5  | 6  | 0 | -1.096495 | -1.340308 | 1.101400  |
| 6  | 6  | 0 | -1.963624 | -0.214844 | 1.710778  |
| 7  | 7  | 0 | -0.877655 | 0.624968  | -0.160195 |
| 8  | 6  | 0 | -0.085142 | 1.688490  | -0.379103 |
| 9  | 8  | 0 | -0.403583 | 2.815776  | 0.000760  |
| 10 | 6  | 0 | 1.237503  | 1.507144  | -1.091135 |
| 11 | 6  | 0 | 2.386311  | 1.364904  | -0.100581 |
| 12 | 16 | 0 | 2.161288  | -0.053496 | 1.019445  |
| 13 | 16 | 0 | 1.961091  | -1.642715 | -0.269765 |
| 14 | 6  | 0 | 0.299842  | -1.517933 | -1.061238 |
| 15 | 1  | 0 | -2.425160 | 1.744740  | 0.759289  |
| 16 | 1  | 0 | -3.424851 | 0.753822  | -1.265891 |
| 17 | 1  | 0 | -3.980339 | -0.387713 | -0.038352 |
| 18 | 1  | 0 | -1.992039 | -0.853004 | -2.190959 |
| 19 | 1  | 0 | -2.542627 | -2.054370 | -1.018140 |
| 20 | 1  | 0 | -0.157799 | -1.459696 | 1.640479  |
| 21 | 1  | 0 | -1.598606 | -2.309964 | 1.084310  |
| 22 | 1  | 0 | -2.909726 | -0.572573 | 2.121427  |
| 23 | 1  | 0 | -1.424859 | 0.307704  | 2.504021  |
| 24 | 1  | 0 | 1.393373  | 2.413027  | -1.682475 |
| 25 | 1  | 0 | 1.239899  | 0.664665  | -1.780116 |
| 26 | 1  | 0 | 2.433366  | 2.227905  | 0.570365  |
| 27 | 1  | 0 | 3.342459  | 1.273311  | -0.618840 |
| 28 | 1  | 0 | 0.427517  | -1.098995 | -2.060565 |
| 29 | 1  | 0 | 0.016585  | -2.566972 | -1.189229 |

-----

**Conformer b**

APFD/6-311+G(2d,p), SCRF = IEFPCM, solvent = CHCl<sub>3</sub>

Number of Imaginary Frequency = 0

Thermal Correction to Free Energy = 0.204662 Hartree

EE + Thermal Free Energy Correction = -1315.85 Hartree

-----

| Center<br>Number | Atomic<br>Number | Atomic<br>Type | Coordinates (Angstroms) |           |           |
|------------------|------------------|----------------|-------------------------|-----------|-----------|
|                  |                  |                | X                       | Y         | Z         |
| 1                | 6                | 0              | 2.173046                | 0.711568  | 0.520690  |
| 2                | 6                | 0              | 1.964079                | -0.230094 | 1.711117  |
| 3                | 6                | 0              | 1.095771                | -1.350839 | 1.094688  |
| 4                | 6                | 0              | 0.841477                | -0.846917 | -0.343364 |
| 5                | 6                | 0              | 2.160260                | -1.030013 | -1.133116 |
| 6                | 6                | 0              | 3.090542                | 0.039553  | -0.510979 |
| 7                | 7                | 0              | 0.874870                | 0.623526  | -0.150957 |
| 8                | 6                | 0              | 0.089453                | 1.690649  | -0.376870 |
| 9                | 8                | 0              | 0.413755                | 2.817817  | -0.001216 |
| 10               | 6                | 0              | -1.235218               | 1.512901  | -1.085959 |
| 11               | 6                | 0              | -2.382276               | 1.368669  | -0.093326 |
| 12               | 16               | 0              | -2.159942               | -0.054694 | 1.021082  |
| 13               | 16               | 0              | -1.964341               | -1.638826 | -0.274862 |
| 14               | 6                | 0              | -0.303318               | -1.513155 | -1.066625 |
| 15               | 1                | 0              | 2.424004                | 1.736798  | 0.773775  |
| 16               | 1                | 0              | 1.426680                | 0.286531  | 2.509173  |

|    |   |   |           |           |           |
|----|---|---|-----------|-----------|-----------|
| 17 | 1 | 0 | 2.910820  | -0.590983 | 2.117521  |
| 18 | 1 | 0 | 0.157556  | -1.473760 | 1.633922  |
| 19 | 1 | 0 | 1.597455  | -2.320575 | 1.069852  |
| 20 | 1 | 0 | 1.986726  | -0.838616 | -2.195274 |
| 21 | 1 | 0 | 2.539517  | -2.048778 | -1.032630 |
| 22 | 1 | 0 | 3.978399  | -0.389143 | -0.042264 |
| 23 | 1 | 0 | 3.420769  | 0.761523  | -1.260287 |
| 24 | 1 | 0 | -1.240321 | 0.672585  | -1.777671 |
| 25 | 1 | 0 | -1.391753 | 2.420821  | -1.673892 |
| 26 | 1 | 0 | -3.339448 | 1.281380  | -0.610486 |
| 27 | 1 | 0 | -2.426530 | 2.229197  | 0.581028  |
| 28 | 1 | 0 | -0.021248 | -2.561950 | -1.199284 |
| 29 | 1 | 0 | -0.431124 | -1.089855 | -2.064117 |

### Conformer c

APFD/6-311+G(2d,p), SCRF = IEFPCM, solvent = CHCl<sub>3</sub>

Number of Imaginary Frequency = 0

Thermal Correction to Free Energy = 0.203727 Hartree

EE + Thermal Free Energy Correction = -1315.8463 Hartree

| Center<br>Number | Atomic<br>Number | Atomic<br>Type | Coordinates (Angstroms) |           |           |
|------------------|------------------|----------------|-------------------------|-----------|-----------|
|                  |                  |                | X                       | Y         | Z         |
| 1                | 6                | 0              | 2.359311                | 0.538506  | -0.552605 |
| 2                | 6                | 0              | 2.951239                | 0.329863  | 0.854960  |
| 3                | 6                | 0              | 1.905300                | -0.595517 | 1.530841  |
| 4                | 6                | 0              | 0.869933                | -0.803378 | 0.406554  |
| 5                | 6                | 0              | 1.525395                | -1.684149 | -0.682509 |
| 6                | 6                | 0              | 2.527539                | -0.736548 | -1.371567 |
| 7                | 7                | 0              | 0.914409                | 0.520688  | -0.263860 |
| 8                | 6                | 0              | 0.256497                | 1.693129  | -0.085852 |
| 9                | 8                | 0              | 0.712253                | 2.742658  | -0.535028 |
| 10               | 6                | 0              | -1.078699               | 1.736691  | 0.624467  |
| 11               | 6                | 0              | -2.275942               | 1.423514  | -0.291694 |
| 12               | 16               | 0              | -3.113751               | -0.149825 | 0.074011  |
| 13               | 16               | 0              | -1.714719               | -1.567483 | -0.431095 |
| 14               | 6                | 0              | -0.437218               | -1.401954 | 0.879718  |
| 15               | 1                | 0              | 2.658523                | 1.458082  | -1.044746 |
| 16               | 1                | 0              | 3.029198                | 1.284555  | 1.379206  |
| 17               | 1                | 0              | 3.948904                | -0.111591 | 0.813059  |
| 18               | 1                | 0              | 1.433887                | -0.107408 | 2.388476  |
| 19               | 1                | 0              | 2.322054                | -1.544356 | 1.874573  |
| 20               | 1                | 0              | 0.769270                | -2.037495 | -1.387058 |
| 21               | 1                | 0              | 1.992973                | -2.559722 | -0.227140 |
| 22               | 1                | 0              | 3.555465                | -1.102628 | -1.346199 |
| 23               | 1                | 0              | 2.256016                | -0.562201 | -2.414614 |
| 24               | 1                | 0              | -1.163018               | 2.765853  | 0.975897  |
| 25               | 1                | 0              | -1.093440               | 1.098030  | 1.507391  |
| 26               | 1                | 0              | -1.999959               | 1.446276  | -1.347216 |
| 27               | 1                | 0              | -3.071279               | 2.159675  | -0.145646 |
| 28               | 1                | 0              | -0.886478               | -0.879226 | 1.723268  |

29            1            0            -0.215622    -2.417926    1.217465

---

**Conformer d**

APFD/6-311+G(2d,p), SCRF = IEFPCM, solvent = CHCl<sub>3</sub>

Number of Imaginary Frequency = 0

Thermal Correction to Free Energy = 0.203723 Hartree

EE + Thermal Free Energy Correction = -1315.8463 Hartree

---

| Center<br>Number | Atomic<br>Number | Atomic<br>Type | Coordinates (Angstroms) |           |           |
|------------------|------------------|----------------|-------------------------|-----------|-----------|
|                  |                  |                | X                       | Y         | Z         |
| 1                | 6                | 0              | -2.359248               | 0.538240  | -0.552833 |
| 2                | 6                | 0              | -2.527637               | -0.737112 | -1.371296 |
| 3                | 6                | 0              | -1.525141               | -1.684400 | -0.682292 |
| 4                | 6                | 0              | -0.869788               | -0.803342 | 0.406646  |
| 5                | 6                | 0              | -1.905297               | -0.595433 | 1.530803  |
| 6                | 6                | 0              | -2.951068               | 0.330104  | 0.854870  |
| 7                | 7                | 0              | -0.914354               | 0.520499  | -0.264247 |
| 8                | 6                | 0              | -0.256711               | 1.693100  | -0.085995 |
| 9                | 8                | 0              | -0.712867               | 2.742570  | -0.534812 |
| 10               | 6                | 0              | 1.078575                | 1.736879  | 0.624232  |
| 11               | 6                | 0              | 2.275846                | 1.423650  | -0.291845 |
| 12               | 16               | 0              | 3.113743                | -0.149671 | 0.073961  |
| 13               | 16               | 0              | 1.714844                | -1.567465 | -0.430961 |
| 14               | 6                | 0              | 0.437400                | -1.401742 | 0.879881  |
| 15               | 1                | 0              | -2.658508               | 1.457664  | -1.045247 |
| 16               | 1                | 0              | -2.256622               | -0.563124 | -2.414532 |
| 17               | 1                | 0              | -3.555550               | -1.103164 | -1.345255 |
| 18               | 1                | 0              | -0.768921               | -2.037396 | -1.386900 |
| 19               | 1                | 0              | -1.992365               | -2.560106 | -0.226837 |
| 20               | 1                | 0              | -1.434003               | -0.107534 | 2.388615  |
| 21               | 1                | 0              | -2.322208               | -1.544293 | 1.874307  |
| 22               | 1                | 0              | -3.948905               | -0.110987 | 0.813318  |
| 23               | 1                | 0              | -3.028526               | 1.285004  | 1.378814  |
| 24               | 1                | 0              | 1.093455                | 1.098435  | 1.507319  |
| 25               | 1                | 0              | 1.162795                | 2.766126  | 0.975412  |
| 26               | 1                | 0              | 3.071213                | 2.159762  | -0.145657 |
| 27               | 1                | 0              | 1.999977                | 1.446449  | -1.347390 |
| 28               | 1                | 0              | 0.215847                | -2.417604 | 1.217998  |
| 29               | 1                | 0              | 0.886771                | -0.878784 | 1.723234  |

---

**TS1**

APFD/6-311+G(2d,p), SCRF = IEFPCM, solvent = CHCl<sub>3</sub>

Number of Imaginary Frequency = 1

Thermal Correction to Free Energy = 0.203664 Hartree

EE + Thermal Free Energy Correction = -1315.8252 Hartree

---

| Center<br>Number | Atomic<br>Number | Atomic<br>Type | Coordinates (Angstroms) |           |           |
|------------------|------------------|----------------|-------------------------|-----------|-----------|
|                  |                  |                | X                       | Y         | Z         |
| 1                | 6                | 0              | 1.987164                | -0.712990 | 1.742960  |
| 2                | 6                | 0              | 2.254289                | 0.404680  | 0.726093  |
| 3                | 6                | 0              | 3.086749                | -0.147853 | -0.437554 |
| 4                | 6                | 0              | 2.059682                | -1.046658 | -1.163653 |
| 5                | 6                | 0              | 0.765326                | -0.861313 | -0.325067 |
| 6                | 6                | 0              | 0.949212                | -1.597610 | 1.008144  |
| 7                | 7                | 0              | 0.925055                | 0.540492  | 0.121699  |
| 8                | 6                | 0              | 0.475117                | 1.721962  | -0.365050 |
| 9                | 8                | 0              | 1.141665                | 2.749159  | -0.288087 |
| 10               | 6                | 0              | -0.977044               | 1.800554  | -0.793544 |
| 11               | 6                | 0              | -1.855290               | 1.629857  | 0.453452  |
| 12               | 16               | 0              | -2.846066               | 0.105093  | 0.660446  |
| 13               | 6                | 0              | -0.433557               | -1.252000 | -1.152642 |
| 14               | 16               | 0              | -2.057913               | -1.557914 | -0.399893 |
| 15               | 1                | 0              | 1.570195                | -0.301630 | 2.664189  |
| 16               | 1                | 0              | 2.902897                | -1.249085 | 1.998628  |
| 17               | 1                | 0              | 2.605718                | 1.344400  | 1.142529  |
| 18               | 1                | 0              | 3.965128                | -0.694700 | -0.089673 |
| 19               | 1                | 0              | 3.426823                | 0.665548  | -1.081363 |
| 20               | 1                | 0              | 2.349525                | -2.098827 | -1.200238 |
| 21               | 1                | 0              | 1.890255                | -0.711729 | -2.190660 |
| 22               | 1                | 0              | -0.000489               | -1.637247 | 1.544464  |
| 23               | 1                | 0              | 1.287079                | -2.623348 | 0.847801  |
| 24               | 1                | 0              | -1.248208               | 1.094138  | -1.574665 |
| 25               | 1                | 0              | -1.116360               | 2.800348  | -1.205056 |
| 26               | 1                | 0              | -2.633997               | 2.395368  | 0.478862  |
| 27               | 1                | 0              | -1.250018               | 1.739243  | 1.353537  |
| 28               | 1                | 0              | -0.237688               | -2.264228 | -1.526289 |
| 29               | 1                | 0              | -0.525776               | -0.621590 | -2.036953 |

## TS2

APFD/6-311+G(2d,p), SCRF = IEFPCM, solvent = CHCl<sub>3</sub>

Number of Imaginary Frequency = 1

Thermal Correction to Free Energy = 0.204929 Hartree

EE + Thermal Free Energy Correction = -1315.8309 Hartree

| Center<br>Number | Atomic<br>Number | Atomic<br>Type | Coordinates (Angstroms) |           |           |
|------------------|------------------|----------------|-------------------------|-----------|-----------|
|                  |                  |                | X                       | Y         | Z         |
| 1                | 6                | 0              | -2.813045               | 0.232459  | -0.964844 |
| 2                | 6                | 0              | -2.299721               | 0.668928  | 0.419731  |
| 3                | 6                | 0              | -2.614539               | -0.406250 | 1.446252  |
| 4                | 6                | 0              | -1.615519               | -1.502984 | 1.046947  |
| 5                | 6                | 0              | -0.839318               | -0.914884 | -0.160240 |
| 6                | 6                | 0              | -1.797093               | -0.862524 | -1.368235 |
| 7                | 7                | 0              | -0.834881               | 0.529677  | 0.243326  |
| 8                | 6                | 0              | -0.175804               | 1.648129  | -0.173218 |
| 9                | 8                | 0              | -0.639888               | 2.764503  | 0.050055  |

|    |    |   |           |           |           |
|----|----|---|-----------|-----------|-----------|
| 10 | 6  | 0 | 1.150723  | 1.556785  | -0.875430 |
| 11 | 6  | 0 | 2.329085  | 1.513935  | 0.083112  |
| 12 | 16 | 0 | 2.502459  | -0.089356 | 0.961668  |
| 13 | 6  | 0 | 0.372827  | -1.849617 | -0.385719 |
| 14 | 16 | 0 | 2.126629  | -1.394351 | -0.573114 |
| 15 | 1  | 0 | -2.786426 | 1.074316  | -1.660048 |
| 16 | 1  | 0 | -3.841318 | -0.131746 | -0.920019 |
| 17 | 1  | 0 | -2.565485 | 1.680962  | 0.704224  |
| 18 | 1  | 0 | -3.656830 | -0.725206 | 1.389572  |
| 19 | 1  | 0 | -2.425569 | -0.046469 | 2.459651  |
| 20 | 1  | 0 | -2.084359 | -2.448885 | 0.765829  |
| 21 | 1  | 0 | -0.911237 | -1.709036 | 1.855710  |
| 22 | 1  | 0 | -1.240834 | -0.587671 | -2.268973 |
| 23 | 1  | 0 | -2.257803 | -1.836903 | -1.548162 |
| 24 | 1  | 0 | 1.229882  | 2.465575  | -1.475809 |
| 25 | 1  | 0 | 1.198985  | 0.701788  | -1.553531 |
| 26 | 1  | 0 | 2.226978  | 2.257569  | 0.877708  |
| 27 | 1  | 0 | 3.259555  | 1.709123  | -0.452599 |
| 28 | 1  | 0 | 0.199180  | -2.400718 | -1.316039 |
| 29 | 1  | 0 | 0.367556  | -2.591015 | 0.411753  |

-----

**Conformer a'**

APFD/6-311+G(2d,p), SCRF = IEFPCM, solvent = CHCl<sub>3</sub>

Number of Imaginary Frequency = 0

Thermal Correction to Free Energy = 0.233756 Hartree

EE + Thermal Free Energy Correction = -1430.2885 Hartree

-----

| Center<br>Number | Atomic<br>Number | Atomic<br>Type | Coordinates (Angstroms) |           |           |
|------------------|------------------|----------------|-------------------------|-----------|-----------|
|                  |                  |                | X                       | Y         | Z         |
| 1                | 6                | 0              | -2.504571               | -1.782282 | 0.186593  |
| 2                | 6                | 0              | -1.961494               | -0.598985 | -0.627520 |
| 3                | 6                | 0              | -2.141836               | 0.683458  | 0.180053  |
| 4                | 6                | 0              | -1.117129               | 0.485747  | 1.324896  |
| 5                | 6                | 0              | -0.414295               | -0.834613 | 0.948223  |
| 6                | 6                | 0              | -1.405278               | -1.982940 | 1.255946  |
| 7                | 7                | 0              | -0.518544               | -0.805882 | -0.529264 |
| 8                | 8                | 0              | -1.838063               | 1.772936  | -0.660590 |
| 9                | 6                | 0              | -2.083092               | 3.020755  | -0.057388 |
| 10               | 6                | 0              | 0.283136                | -0.925773 | -1.603367 |
| 11               | 8                | 0              | -0.162878               | -0.853384 | -2.747373 |
| 12               | 6                | 0              | 1.770842                | -1.120971 | -1.409437 |
| 13               | 6                | 0              | 2.517711                | 0.208355  | -1.413267 |
| 14               | 16               | 0              | 1.969832                | 1.330621  | -0.087047 |
| 15               | 6                | 0              | 0.906554                | -1.079120 | 1.636069  |
| 16               | 16               | 0              | 2.225354                | 0.209684  | 1.616503  |
| 17               | 1                | 0              | -2.606886               | -2.662420 | -0.449644 |
| 18               | 1                | 0              | -3.483698               | -1.565049 | 0.618224  |
| 19               | 1                | 0              | -2.297374               | -0.525474 | -1.656791 |
| 20               | 1                | 0              | -3.170960               | 0.783246  | 0.549706  |
| 21               | 1                | 0              | -1.575690               | 0.419365  | 2.313111  |

-----

|    |   |   |           |           |           |
|----|---|---|-----------|-----------|-----------|
| 22 | 1 | 0 | -0.404773 | 1.309670  | 1.329697  |
| 23 | 1 | 0 | -0.904623 | -2.947169 | 1.138351  |
| 24 | 1 | 0 | -1.776325 | -1.918766 | 2.280586  |
| 25 | 1 | 0 | -1.849971 | 3.787047  | -0.796368 |
| 26 | 1 | 0 | -3.135904 | 3.117011  | 0.240797  |
| 27 | 1 | 0 | -1.454160 | 3.183707  | 0.826800  |
| 28 | 1 | 0 | 2.113420  | -1.716302 | -2.259252 |
| 29 | 1 | 0 | 2.015463  | -1.675062 | -0.504912 |
| 30 | 1 | 0 | 2.314824  | 0.767647  | -2.331526 |
| 31 | 1 | 0 | 3.594522  | 0.048440  | -1.334235 |
| 32 | 1 | 0 | 1.344844  | -2.021815 | 1.305207  |
| 33 | 1 | 0 | 0.688354  | -1.185981 | 2.702703  |

-----

**Conformer b'**

APFD/6-311+G(2d,p), SCRF = IEFPCM, solvent = CHCl<sub>3</sub>

Number of Imaginary Frequency = 0

Thermal Correction to Free Energy = 0.233148 Hartree

EE + Thermal Free Energy Correction = -1430.2889 Hartree

-----

| Center<br>Number | Atomic<br>Number | Atomic<br>Type | Coordinates (Angstroms) |           |           |
|------------------|------------------|----------------|-------------------------|-----------|-----------|
|                  |                  |                | X                       | Y         | Z         |
| 1                | 6                | 0              | 1.008206                | -0.588802 | 2.185049  |
| 2                | 6                | 0              | 1.549947                | 0.396614  | 1.142915  |
| 3                | 6                | 0              | 2.605303                | -0.307430 | 0.290456  |
| 4                | 6                | 0              | 1.737029                | -1.260685 | -0.571246 |
| 5                | 6                | 0              | 0.297093                | -0.957691 | -0.093426 |
| 6                | 6                | 0              | 0.157651                | -1.550859 | 1.325129  |
| 7                | 7                | 0              | 0.437042                | 0.487740  | 0.201023  |
| 8                | 8                | 0              | 3.287791                | 0.662863  | -0.472442 |
| 9                | 6                | 0              | 4.390665                | 0.131956  | -1.170046 |
| 10               | 6                | 0              | -0.208771               | 1.639349  | -0.061777 |
| 11               | 8                | 0              | 0.088022                | 2.686079  | 0.510975  |
| 12               | 6                | 0              | -1.328285               | 1.655668  | -1.079456 |
| 13               | 6                | 0              | -2.690554               | 1.577721  | -0.403504 |
| 14               | 16               | 0              | -2.864802               | 0.077128  | 0.613385  |
| 15               | 6                | 0              | -0.705909               | -1.451732 | -1.107643 |
| 16               | 16               | 0              | -2.509645               | -1.444136 | -0.723646 |
| 17               | 1                | 0              | 0.387948                | -0.056079 | 2.907594  |
| 18               | 1                | 0              | 1.808822                | -1.090351 | 2.732192  |
| 19               | 1                | 0              | 1.856249                | 1.369117  | 1.514152  |
| 20               | 1                | 0              | 3.325069                | -0.850129 | 0.916783  |
| 21               | 1                | 0              | 1.988743                | -2.315849 | -0.453668 |
| 22               | 1                | 0              | 1.843556                | -0.992537 | -1.625692 |
| 23               | 1                | 0              | -0.883985               | -1.555012 | 1.641737  |
| 24               | 1                | 0              | 0.518818                | -2.581278 | 1.342314  |
| 25               | 1                | 0              | 4.855514                | 0.954515  | -1.713039 |
| 26               | 1                | 0              | 5.124364                | -0.302386 | -0.478105 |
| 27               | 1                | 0              | 4.090829                | -0.640608 | -1.889598 |
| 28               | 1                | 0              | -1.239936               | 0.867364  | -1.824529 |
| 29               | 1                | 0              | -1.248449               | 2.610882  | -1.604820 |

-----

|    |   |   |           |           |           |
|----|---|---|-----------|-----------|-----------|
| 30 | 1 | 0 | -3.498292 | 1.620248  | -1.136175 |
| 31 | 1 | 0 | -2.820352 | 2.396937  | 0.309945  |
| 32 | 1 | 0 | -0.500323 | -2.515450 | -1.260035 |
| 33 | 1 | 0 | -0.557481 | -0.957628 | -2.069017 |

-----

**Conformer c'**

APFD/6-311+G(2d,p), SCRF = IEFPCM, solvent = CHCl<sub>3</sub>

Number of Imaginary Frequency = 0

Thermal Correction to Free Energy = 0.231945 Hartree

EE + Thermal Free Energy Correction = -1430.2864 Hartree

-----

| Center<br>Number | Atomic<br>Number | Atomic<br>Type | Coordinates (Angstroms) |           |           |
|------------------|------------------|----------------|-------------------------|-----------|-----------|
|                  |                  |                | X                       | Y         | Z         |
| 1                | 6                | 0              | -2.192654               | 0.424945  | -1.921313 |
| 2                | 6                | 0              | -2.003280               | 0.594458  | -0.400968 |
| 3                | 6                | 0              | -2.396126               | -0.714512 | 0.286984  |
| 4                | 6                | 0              | -1.248696               | -1.635246 | -0.145649 |
| 5                | 6                | 0              | -0.306935               | -0.722217 | -0.960518 |
| 6                | 6                | 0              | -0.978851               | -0.451274 | -2.321783 |
| 7                | 7                | 0              | -0.541990               | 0.569791  | -0.270864 |
| 8                | 8                | 0              | -2.397318               | -0.639781 | 1.695785  |
| 9                | 6                | 0              | -3.514939               | 0.042716  | 2.218572  |
| 10               | 6                | 0              | 0.139499                | 1.737193  | -0.169592 |
| 11               | 8                | 0              | -0.433877               | 2.769647  | 0.170166  |
| 12               | 6                | 0              | 1.629017                | 1.786717  | -0.424406 |
| 13               | 6                | 0              | 2.477012                | 1.368861  | 0.791550  |
| 14               | 16               | 0              | 3.399611                | -0.182994 | 0.566349  |
| 15               | 6                | 0              | 1.077911                | -1.322297 | -1.075353 |
| 16               | 16               | 0              | 1.924147                | -1.612397 | 0.528413  |
| 17               | 1                | 0              | -2.161570               | 1.397233  | -2.415507 |
| 18               | 1                | 0              | -3.151248               | -0.040207 | -2.161741 |
| 19               | 1                | 0              | -2.433615               | 1.496038  | 0.020881  |
| 20               | 1                | 0              | -3.378602               | -1.059676 | -0.060845 |
| 21               | 1                | 0              | -1.575215               | -2.492547 | -0.736294 |
| 22               | 1                | 0              | -0.746205               | -2.001208 | 0.752272  |
| 23               | 1                | 0              | -0.290761               | 0.091282  | -2.975732 |
| 24               | 1                | 0              | -1.259041               | -1.378655 | -2.825089 |
| 25               | 1                | 0              | -4.452999               | -0.421855 | 1.887008  |
| 26               | 1                | 0              | -3.449779               | -0.022895 | 3.304451  |
| 27               | 1                | 0              | -3.525904               | 1.100735  | 1.932233  |
| 28               | 1                | 0              | 1.831315                | 2.833198  | -0.655480 |
| 29               | 1                | 0              | 1.908460                | 1.207960  | -1.304740 |
| 30               | 1                | 0              | 1.880500                | 1.298356  | 1.702441  |
| 31               | 1                | 0              | 3.269207                | 2.099982  | 0.974172  |
| 32               | 1                | 0              | 1.752144                | -0.757281 | -1.718035 |
| 33               | 1                | 0              | 0.954949                | -2.307746 | -1.532891 |

-----

**Conformer d'**



APFD/6-311+G(2d,p), SCRF = IEFPCM, solvent = CHCl<sub>3</sub>

Number of Imaginary Frequency = 0

Thermal Correction to Free Energy = 0.232114 Hartree

EE + Thermal Free Energy Correction = -1430.2854 Hartree

---

| Center<br>Number | Atomic<br>Number | Atomic<br>Type | Coordinates (Angstroms) |           |           |
|------------------|------------------|----------------|-------------------------|-----------|-----------|
|                  |                  |                | X                       | Y         | Z         |
| 1                | 6                | 0              | 1.613499                | -1.694000 | 1.646608  |
| 2                | 6                | 0              | 1.804225                | -0.256824 | 1.167906  |
| 3                | 6                | 0              | 2.625855                | -0.268902 | -0.129637 |
| 4                | 6                | 0              | 1.610065                | -0.837798 | -1.160588 |
| 5                | 6                | 0              | 0.339585                | -1.028060 | -0.309918 |
| 6                | 6                | 0              | 0.584341                | -2.230836 | 0.631508  |
| 7                | 7                | 0              | 0.473258                | 0.083415  | 0.655675  |
| 8                | 8                | 0              | 3.013425                | 1.055875  | -0.419423 |
| 9                | 6                | 0              | 3.907872                | 1.140168  | -1.504875 |
| 10               | 6                | 0              | -0.023052               | 1.336620  | 0.779077  |
| 11               | 8                | 0              | 0.356516                | 2.073252  | 1.684828  |
| 12               | 6                | 0              | -1.058932               | 1.865119  | -0.190038 |
| 13               | 6                | 0              | -2.504647               | 1.710967  | 0.305900  |
| 14               | 16               | 0              | -3.459943               | 0.417155  | -0.547896 |
| 15               | 6                | 0              | -0.926727               | -1.208518 | -1.117915 |
| 16               | 16               | 0              | -2.454541               | -1.316679 | -0.098631 |
| 17               | 1                | 0              | 1.215351                | -1.704488 | 2.662121  |
| 18               | 1                | 0              | 2.551021                | -2.253366 | 1.646664  |
| 19               | 1                | 0              | 2.159208                | 0.458692  | 1.902642  |
| 20               | 1                | 0              | 3.520124                | -0.898043 | -0.030189 |
| 21               | 1                | 0              | 1.936136                | -1.765128 | -1.634340 |
| 22               | 1                | 0              | 1.431188                | -0.094441 | -1.942170 |
| 23               | 1                | 0              | -0.347007               | -2.511601 | 1.128205  |
| 24               | 1                | 0              | 0.935979                | -3.094454 | 0.063320  |
| 25               | 1                | 0              | 4.154625                | 2.193149  | -1.638232 |
| 26               | 1                | 0              | 4.828576                | 0.577427  | -1.302271 |
| 27               | 1                | 0              | 3.465620                | 0.760896  | -2.434858 |
| 28               | 1                | 0              | -0.945324               | 1.449927  | -1.190855 |
| 29               | 1                | 0              | -0.827161               | 2.929633  | -0.259936 |
| 30               | 1                | 0              | -3.084564               | 2.612221  | 0.086768  |
| 31               | 1                | 0              | -2.546337               | 1.549089  | 1.384341  |
| 32               | 1                | 0              | -0.837608               | -2.162306 | -1.644735 |
| 33               | 1                | 0              | -1.082917               | -0.439363 | -1.873166 |

---

## 6. References

- [S1] C. Sabrina Cumberbatch, Michael North, Guiseppa Zagotto. *Tetrahedron*, Volume 1993, 49, 9049-9066.
- [S2] Q. Zhu, C. Costentin, J. Stubbe, D. G. Nocera, *Chem. Sci.*, 2023, 14, 6876.
- [S3] Marco Borsari, Maria Cannio, Giovanna Gavioli, *Electroanalysis* 2003, 15, No. 14, 1192-1197.
- [S4] Gaussian 16, Revision C.01, M. J. Frisch, G. W. Trucks, H. B. Schlegel, G. E. Scuseria, M. A. Robb, J. R. Cheeseman, G. Scalmani, V. Barone, G. A. Petersson, H. Nakatsuji, X. Li, M. Caricato, A. V. Marenich, J. Bloino, B. G. Janesko, R. Gomperts, B. Mennucci, H. P. Hratchian, J. V. Ortiz, A. F. Izmaylov, J. L. Sonnenberg, D. Williams-Young, F. Ding, F. Lipparini, F. Egidi, J. Goings, B. Peng, A. Petrone, T. Henderson, D. Ranasinghe, V. G. Zakrzewski, J. Gao, N. Rega, G. Zheng, W. Liang, M. Hada, M. Ehara, K. Toyota, R. Fukuda, J. Hasegawa, M. Ishida, T. Nakajima, Y. Honda, O. Kitao, H. Nakai, T. Vreven, K. Throssell, J. A. Montgomery, Jr., J. E. Peralta, F. Ogliaro, M. J. Bearpark, J. J. Heyd, E. N. Brothers, K. N. Kudin, V. N. Staroverov, T. A. Keith, R. Kobayashi, J. Normand, K. Raghavachari, A. P. Rendell, J. C. Burant, S. S. Iyengar, J. Tomasi, M. Cossi, J. M. Millam, M. Klene, C. Adamo, R. Cammi, J. W. Ochterski, R. L. Martin, K. Morokuma, O. Farkas, J. B. Foresman, and D. J. Fox, Gaussian, Inc., Wallingford CT, 2016.
